# Supplementary material
Source: PubMed Central journal article supplement (PMC2669227)

## Supporting Information

for

### **Does Neighboring Group Participation by Non-Vicinal Esters Play a Role in Glycosylation Reactions? Effective Probes for the Detection of Bridging Intermediates**

*David Crich, \* Tianshun Hu and Feng Cai*

Chemistry Department, Wayne State University, 5101 Cass Avenue, Detroit, MI, 48202, and Department of Chemistry, University of Illinois at Chicago, 845 West Taylor Street, Chicago, IL, 60607

| Entry                                                                                                                                         | <sup>1</sup> H NMR | <sup>13</sup> C NMR |
|-----------------------------------------------------------------------------------------------------------------------------------------------|--------------------|---------------------|
| General Experimental                                                                                                                          | S-3                |                     |
| Ethyl 3,4,6-tri- <i>O</i> -benzyl-2- <i>O</i> - <i>tert</i> -butyloxycarbonyl-1-thio- $\beta$ -D-glucopyranoside <b>9</b>                     | S-4                | S-5                 |
| 3,4,6-Tri- <i>O</i> -benzyl-1,2- <i>O</i> -carbonyl- $\alpha$ -D-glucopyranoside <b>10</b>                                                    | S-6                | S-7                 |
| Phenyl 2- <i>O</i> - <i>tert</i> -butoxycarbonyl-3,4,6-tri- <i>O</i> -benzyl-1-thio- $\alpha$ -D-mannopyranoside <b>11</b>                    | S-8                | S-9                 |
| 3,4,6-Tri- <i>O</i> -benzyl-1,2- <i>O</i> -carbonyl- $\alpha$ -D-mannopyranoside <b>12</b>                                                    | S-10               | S-11                |
| Phenyl 2,4,6-tri- <i>O</i> -benzyl-1-thio- $\beta$ -D-allopyranoside <b>14</b>                                                                | S-12               | S-13                |
| Phenyl 3- <i>O</i> - <i>tert</i> -butoxycarbonyl-2,4,6-tri- <i>O</i> -benzyl-1-thio- $\beta$ -D-allopyranoside <b>15</b>                      | S-14               | S-15                |
| 2,4,6-Tri- <i>O</i> -benzyl-1,3- <i>O</i> -carbonyl- $\alpha$ -D-allose <b>16</b>                                                             | S-16               | S-17                |
| Cyclohexyl 3- <i>O</i> - <i>tert</i> -butoxycarbonyl-2,4,6- <i>O</i> -benzyl- $\alpha$ -D-allopyranoside <b>17<math>\alpha</math></b> and     | S-18               | S-19                |
| Cyclohexyl 3- <i>O</i> - <i>tert</i> -butoxycarbonyl-2,4,6- <i>O</i> -benzyl- $\beta$ -D-allopyranoside <b>17<math>\beta</math></b>           | S-20               | S-21                |
| 3- <i>O</i> - <i>tert</i> -Butoxycarbonyl-2,4,6-tri- <i>O</i> -benzyl-D-allose <b>18</b>                                                      | S-22               | S-23                |
| Phenyl 3- <i>O</i> - <i>tert</i> -butoxycarbonyl-2- <i>O</i> -benzyl-4,6- <i>O</i> -benzylidene-1-thio- $\alpha$ -D-mannopyranoside <b>21</b> | S-24               | S-25                |

|                                                                                                                                                                                                                                                                                              |              |              |
|----------------------------------------------------------------------------------------------------------------------------------------------------------------------------------------------------------------------------------------------------------------------------------------------|--------------|--------------|
| Phenyl 3- <i>O</i> - <i>tert</i> -butoxycarbonyl-2- <i>O</i> -benzyl-4,6- <i>O</i> -benzylidene-1-thio- $\alpha$ -D-mannopyranoside <b>S-Oxide 22</b>                                                                                                                                        | S-26         | S-27         |
| Cyclohexyl 3- <i>O</i> - <i>tert</i> -butoxycarbonyl-2- <i>O</i> -benzyl-4,6- <i>O</i> -benzylidene- $\alpha$ -D-mannopyranoside <b>23</b>                                                                                                                                                   | S-28         | S-29         |
| Ethyl 4- <i>O</i> - <i>tert</i> -butoxycarbonyl-2,3,6-tri- <i>O</i> -benzyl-1-thio- $\beta$ -D-galactopyranoside <b>24</b>                                                                                                                                                                   | S-30         | S-31         |
| 4- <i>O</i> - <i>tert</i> -Butoxycarbonyl-2,3,6- <i>O</i> -tribenzyl- $\alpha$ -D-galactopyranosyl acetate <b>25<math>\alpha</math></b> and<br>4- <i>O</i> - <i>tert</i> -Butoxycarbonyl-2,3,6- <i>O</i> -benzyl- $\beta$ -D-galactopyranosyl acetate <b>25<math>\beta</math></b>            | S-32<br>S-34 | S-33<br>S-35 |
| Cyclohexyl 4- <i>O</i> - <i>tert</i> -butoxycarbonyl-2,3,6- <i>O</i> -benzyl--D-galactopyranoside <b>26<math>\alpha</math></b> and<br>Cyclohexyl 4- <i>O</i> - <i>tert</i> -butoxycarbonyl-2,3,6- <i>O</i> -benzyl- $\beta$ -D-galactopyranoside <b>26<math>\beta</math></b>                 | S-36<br>S-38 | S-37<br>S-39 |
| Phenyl 2,3,6-tri- <i>O</i> -benzyl-4- <i>O</i> - <i>tert</i> -butyloxycarbonyl-1-thio- $\alpha$ -D-mannopyranoside <b>27</b>                                                                                                                                                                 | S-40         | S-41         |
| Isopropyl 2,3,6-tri- <i>O</i> -benzyl-4- <i>O</i> - <i>tert</i> -butyloxycarbonyl- $\alpha$ -D-mannopyranoside <b>28<math>\alpha</math></b> and<br>isopropyl 2,3,6-tri- <i>O</i> -benzyl-4- <i>O</i> - <i>tert</i> -butyloxycarbonyl- $\beta$ -D-mannopyranoside <b>28<math>\beta</math></b> | S-42<br>S-44 | S-43<br>S-45 |
| <i>N</i> -(2',3',6'-Tri- <i>O</i> -benzyl-4'- <i>O</i> - <i>tert</i> -butyloxycarbonyl- $\alpha$ -D-mannopyranosyl)-succinimide <b>29</b>                                                                                                                                                    | S-46         | S-47         |
| <i>p</i> -Tolyl 4- <i>O</i> - <i>tert</i> -butoxycarbonyl-3-azido-2,3,6-trideoxy-1-thio- $\alpha$ -L- <i>lyxo</i> -hexopyranoside <b>30</b>                                                                                                                                                  | S-48         | S-49         |
| 4- <i>O</i> - <i>tert</i> -butoxycarbonyl- 3-azido-2,3,6-trideoxy-1- $\alpha$ -L- <i>lyxo</i> pyranose                                                                                                                                                                                       | S-50         | S-51         |
| 4- <i>O</i> - <i>tert</i> -Butoxycarbonyl-3-azido-2,3,6-trideoxy-1-L- <i>lyxo</i> -hexopyranosyl acetate <b>31</b>                                                                                                                                                                           | S-52         | S-53         |
| Cyclohexyl 4- <i>O</i> - <i>tert</i> -butoxycarbonyl-3-azido-2,3,6-trideoxy-1-L- <i>lyxo</i> -hexopyranoside <b>32</b>                                                                                                                                                                       | S-54         | S-55         |
| Phenyl 2,3,4-tri- <i>O</i> -benzyl-6- <i>O</i> - <i>tert</i> -butyloxycarbonyl-1-thio- $\beta$ -D-glucopyranoside <b>33</b>                                                                                                                                                                  | S-56         | S-57         |
| Isopropyl 2,3,4-tri- <i>O</i> -benzyl-6- <i>O</i> - <i>tert</i> -butyloxycarbonyl- $\alpha$ -D-glucopyranoside <b>34<math>\alpha</math></b> and<br>isopropyl 2,3,4-tri- <i>O</i> -benzyl-6- <i>O</i> - <i>tert</i> -butyloxycarbonyl- $\beta$ -D-glucopyranoside <b>34<math>\beta</math></b> | S-58         | S-59         |
| Di-(2,3,4-tri- <i>O</i> -benzyl-D-glucopyranoside)-(1,6), (6,1)-dicarbonate <b>35</b>                                                                                                                                                                                                        | S-60         | S-61         |
| Ethyl 3,4,6-tri- <i>O</i> -benzyl-2- <i>O</i> -(2-carboxybenzoyl)-1-thio- $\beta$ -D-glucopyranoside <b>36</b>                                                                                                                                                                               | S-62         | S-63         |
| 3,4,6-Tri- <i>O</i> -benzyl-1,2- <i>O</i> -phthalidylidene- $\alpha$ -D-glucopyranose <b>37</b>                                                                                                                                                                                              | S-64         | S-65         |
| Phenyl 2,3,6-tri- <i>O</i> -benzyl-4- <i>O</i> -(2-carboxybenzoyl)-1-thio- $\beta$ -D-galactopyranoside <b>38</b>                                                                                                                                                                            | S-66         | S-67         |
| 3,4,6-Tri- <i>O</i> -benzyl-1,2- <i>O</i> -phthalate- $\beta$ -D-galactopyranoside <b>40</b>                                                                                                                                                                                                 | S-68         | S-69         |
| Phenyl 2,3,6-tri- <i>O</i> -benzyl-4- <i>O</i> -(4-methoxybenzoyl)-1-thio- $\beta$ -D-galactopyranoside <b>41</b>                                                                                                                                                                            | S-70         | S-71         |
| 2,3,6-Tri- <i>O</i> -benzyl-4- <i>O</i> -(4-methoxybenzoyl)- $\alpha$ -D-[1- <sup>16/18</sup> O]-galactopyranoside <b>43</b>                                                                                                                                                                 | S-72         | S-73 S-74    |

|                                                                                                                                                                               |      |                        |
|-------------------------------------------------------------------------------------------------------------------------------------------------------------------------------|------|------------------------|
|                                                                                                                                                                               |      | S-75                   |
| 2,3,6-Tri- <i>O</i> -benzyl-4- <i>O</i> -(4-methoxybenzoyl)-D-[1- <sup>16/18</sup> O]-galactopyranosyl acetate <b>47</b>                                                      | S-76 | S-77 S-78<br>S-79 S-80 |
| Phenyl 2,3,6-tri- <i>O</i> -benzyl-4- <i>O</i> -(4-methoxybenzoyl)-1-thio- $\alpha\beta$ -D-galactopyranoside <b>41<math>\alpha</math></b><br>and <b>41<math>\beta</math></b> | S-81 | S-82                   |

**General Experimental.** Unless otherwise stated <sup>1</sup>H and <sup>13</sup>C NMR spectra were recorded in CDCl<sub>3</sub> solution at 500 and 125 MHz, respectively. Specific rotations were recorded in CHCl<sub>3</sub> solution, unless otherwise stated. All solvents were dried and distilled by standard protocols. All reactions were conducted under a blanket of dry nitrogen. All organic extracts were dried over sodium sulfate and concentrated under aspirator vacuum. Chromatographic purifications were carried out over silica gel.

Ethyl 3,4,6-tri-*O*-benzyl-2-*O*-*tert*-butyloxycarbonyl-1-thio- $\beta$ -D-glucopyranoside (**9**)

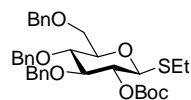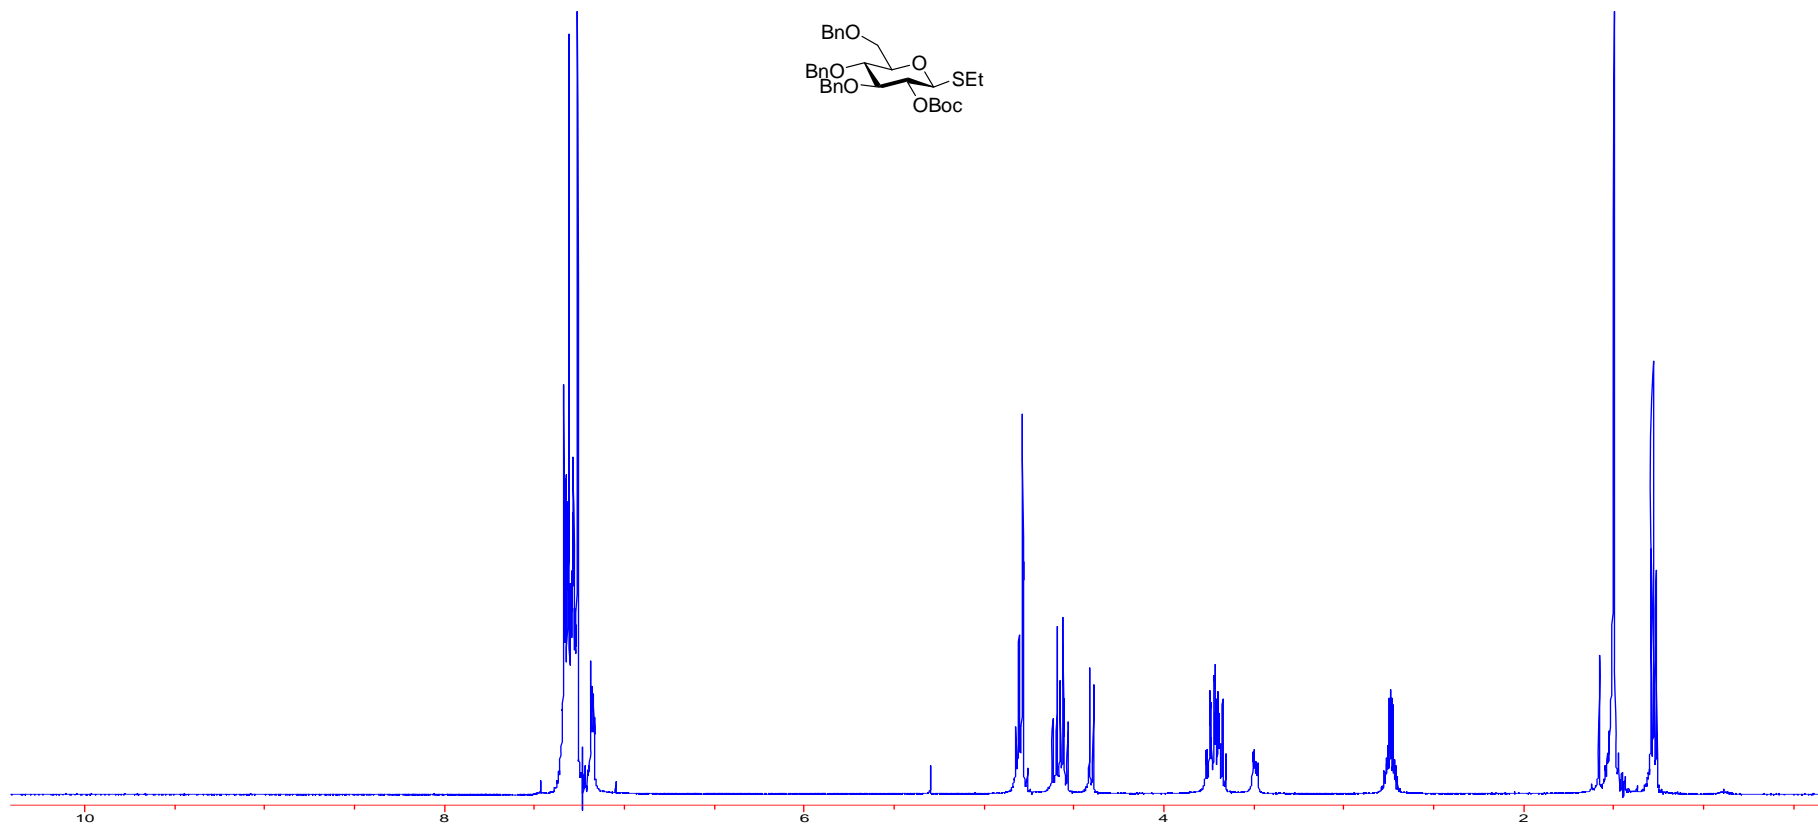

Ethyl 3,4,6-tri-*O*-benzyl-2-*O*-*tert*-butyloxycarbonyl-1-thio- $\beta$ -D-glucopyranoside (**9**)

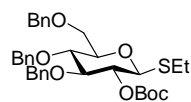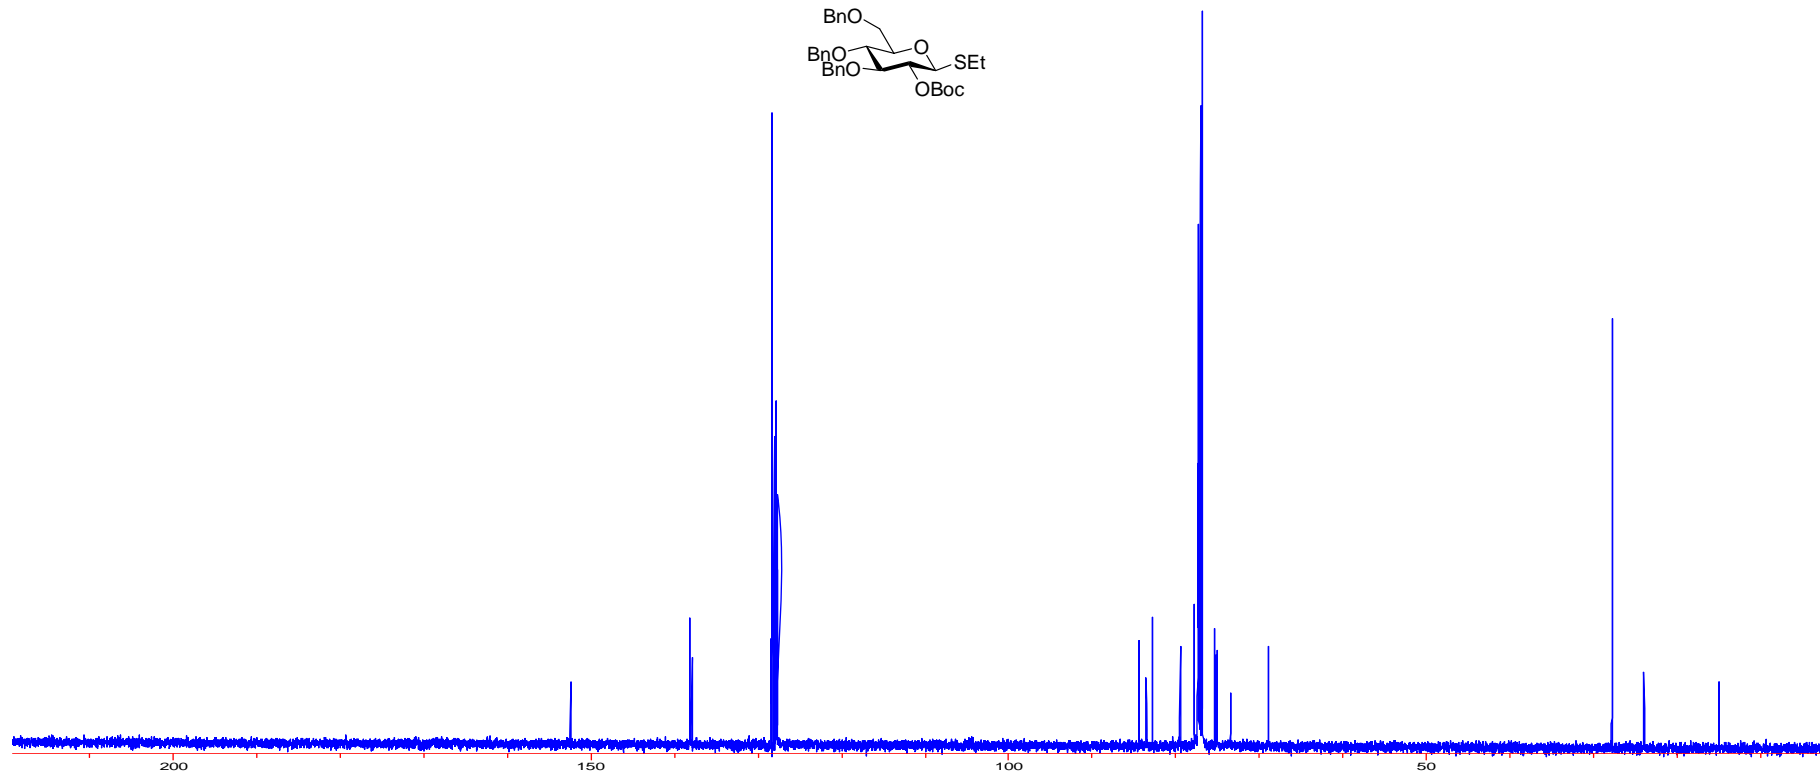

3,4,6-Tri-*O*-benzyl-1,2-*O*-carbonyl- $\alpha$ -D-glucopyranoside (**10**)

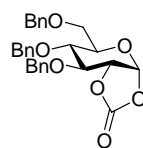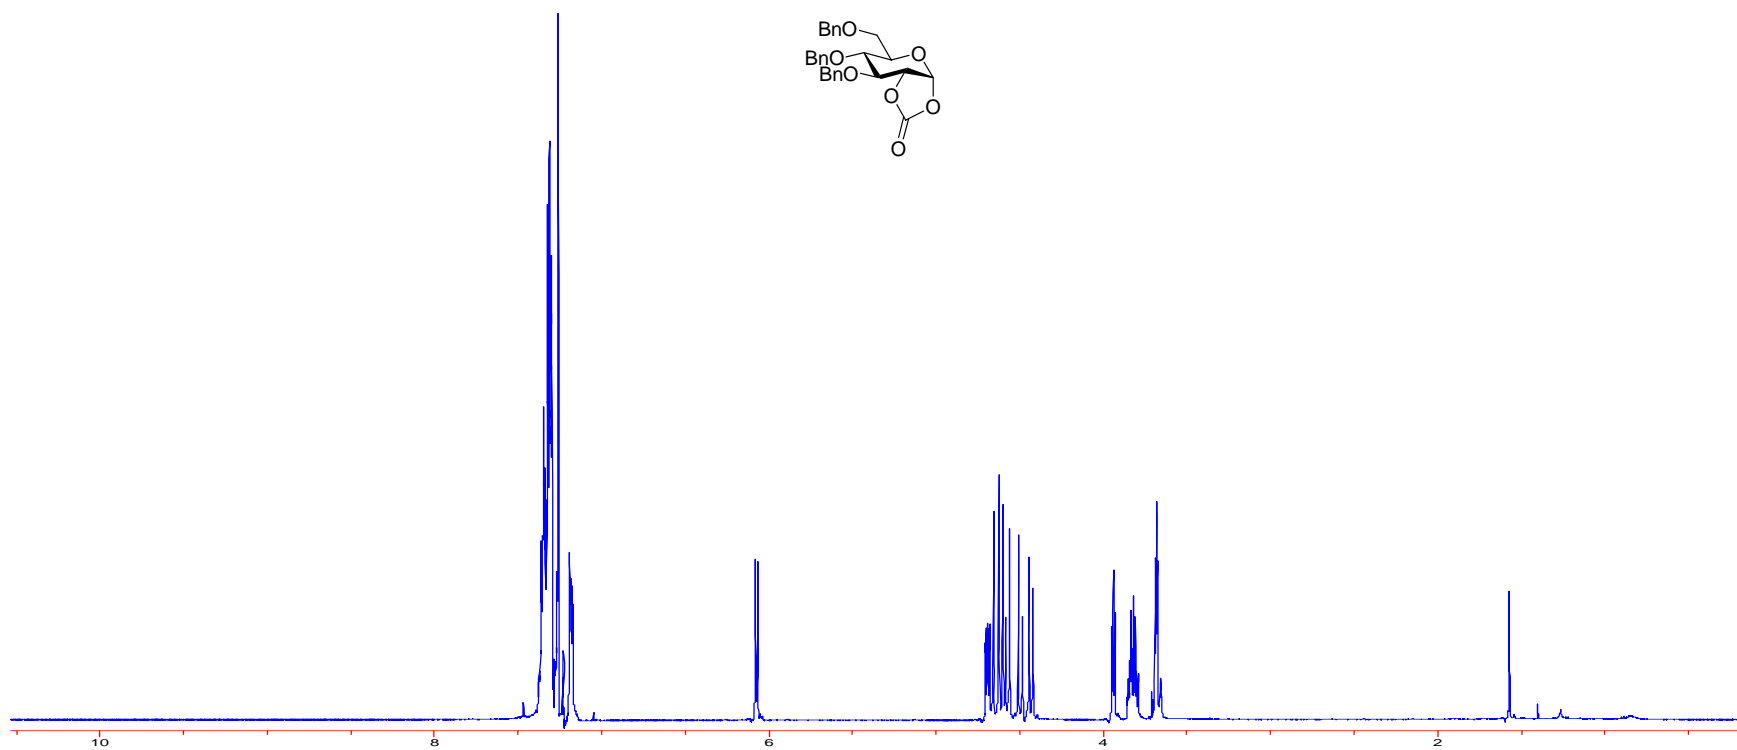

3,4,6-Tri-*O*-benzyl-1,2-*O*-carbonyl- $\alpha$ -D-glucopyranoside (**10**)

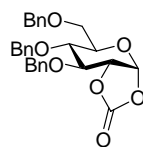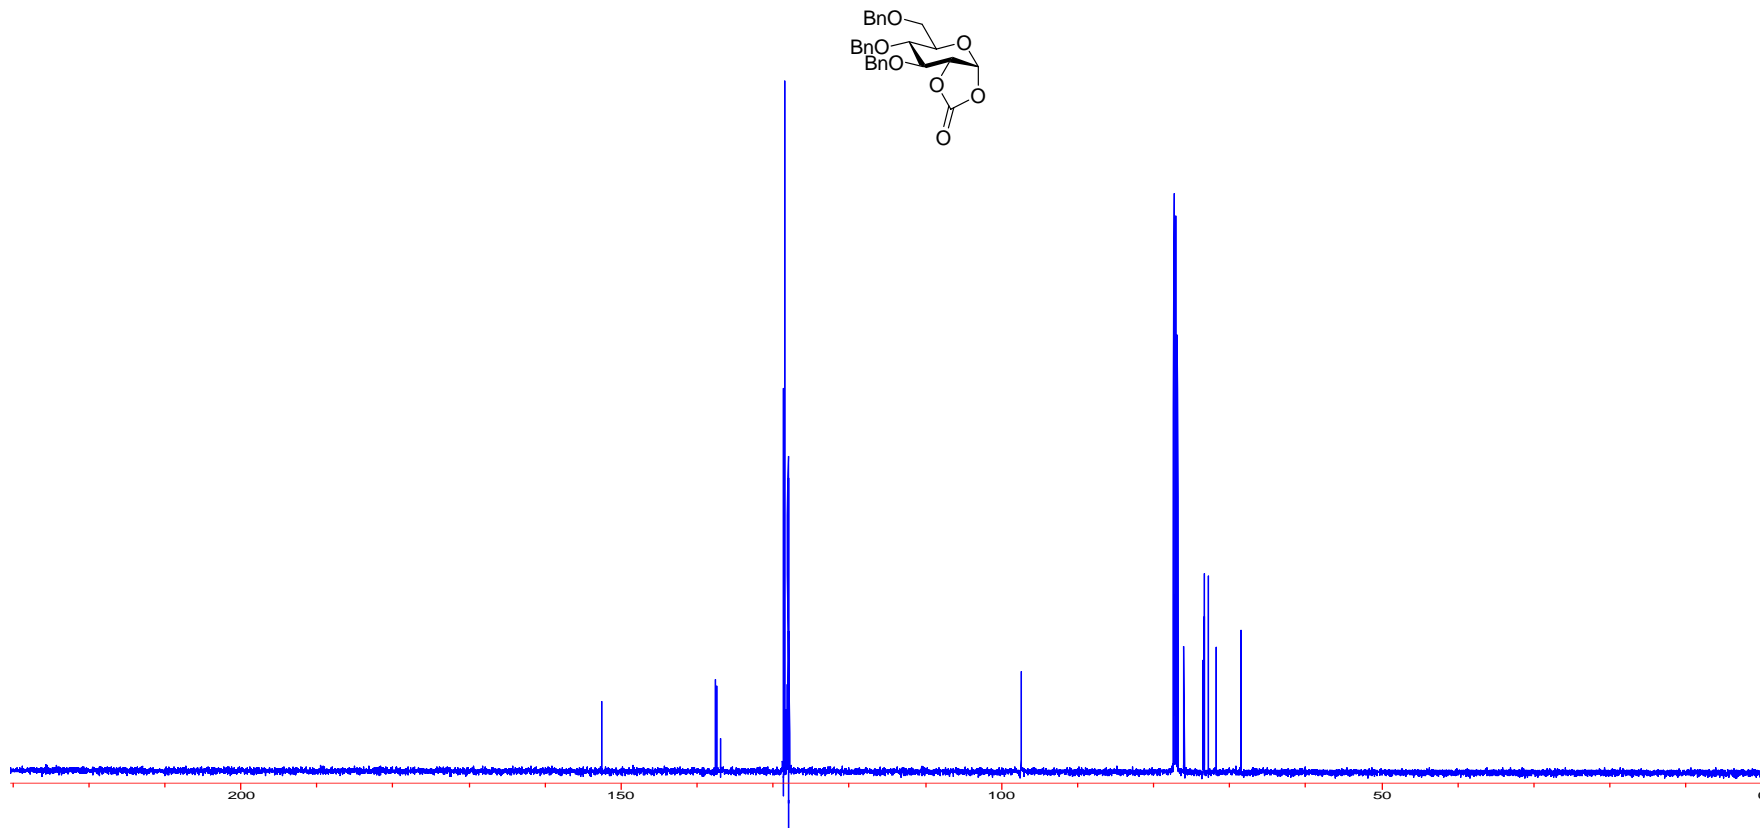

Phenyl 2-*O*-*tert*-butoxycarbonyl-3,4,6-tri-*O*-benzyl-1-thio- $\alpha$ -D-mannopyranoside (**11**).

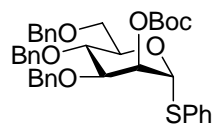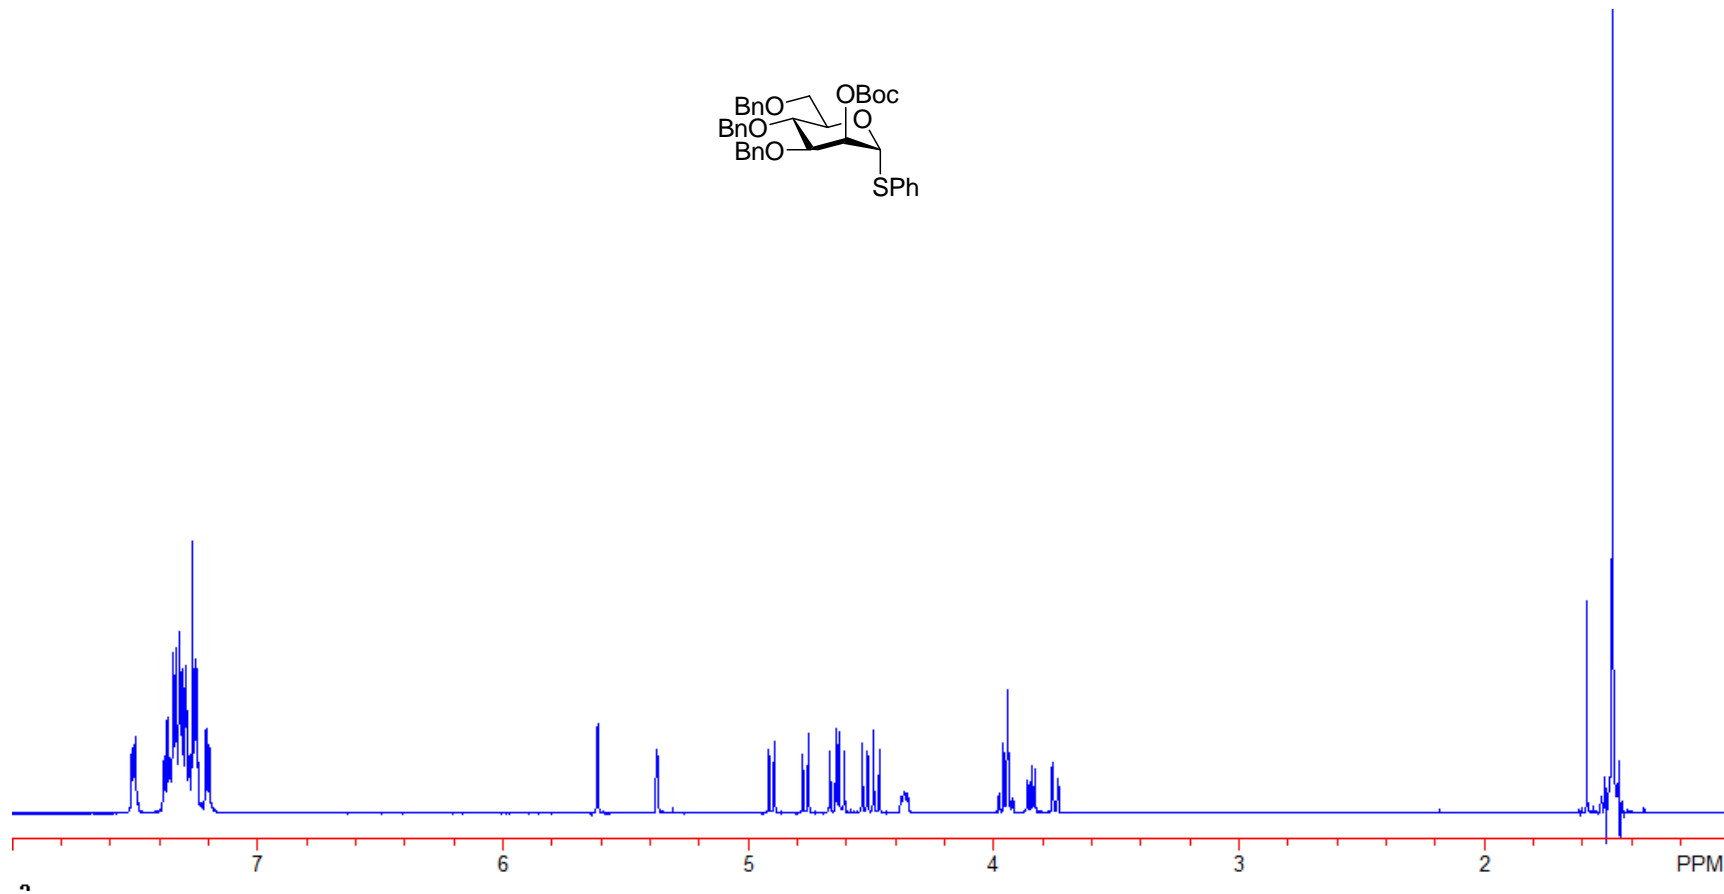



Phenyl 2-*O*-*tert*-butoxycarbonyl-3,4,6-tri-*O*-benzyl-1-thio- $\alpha$ -D-mannopyranoside (**11**).

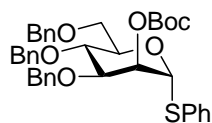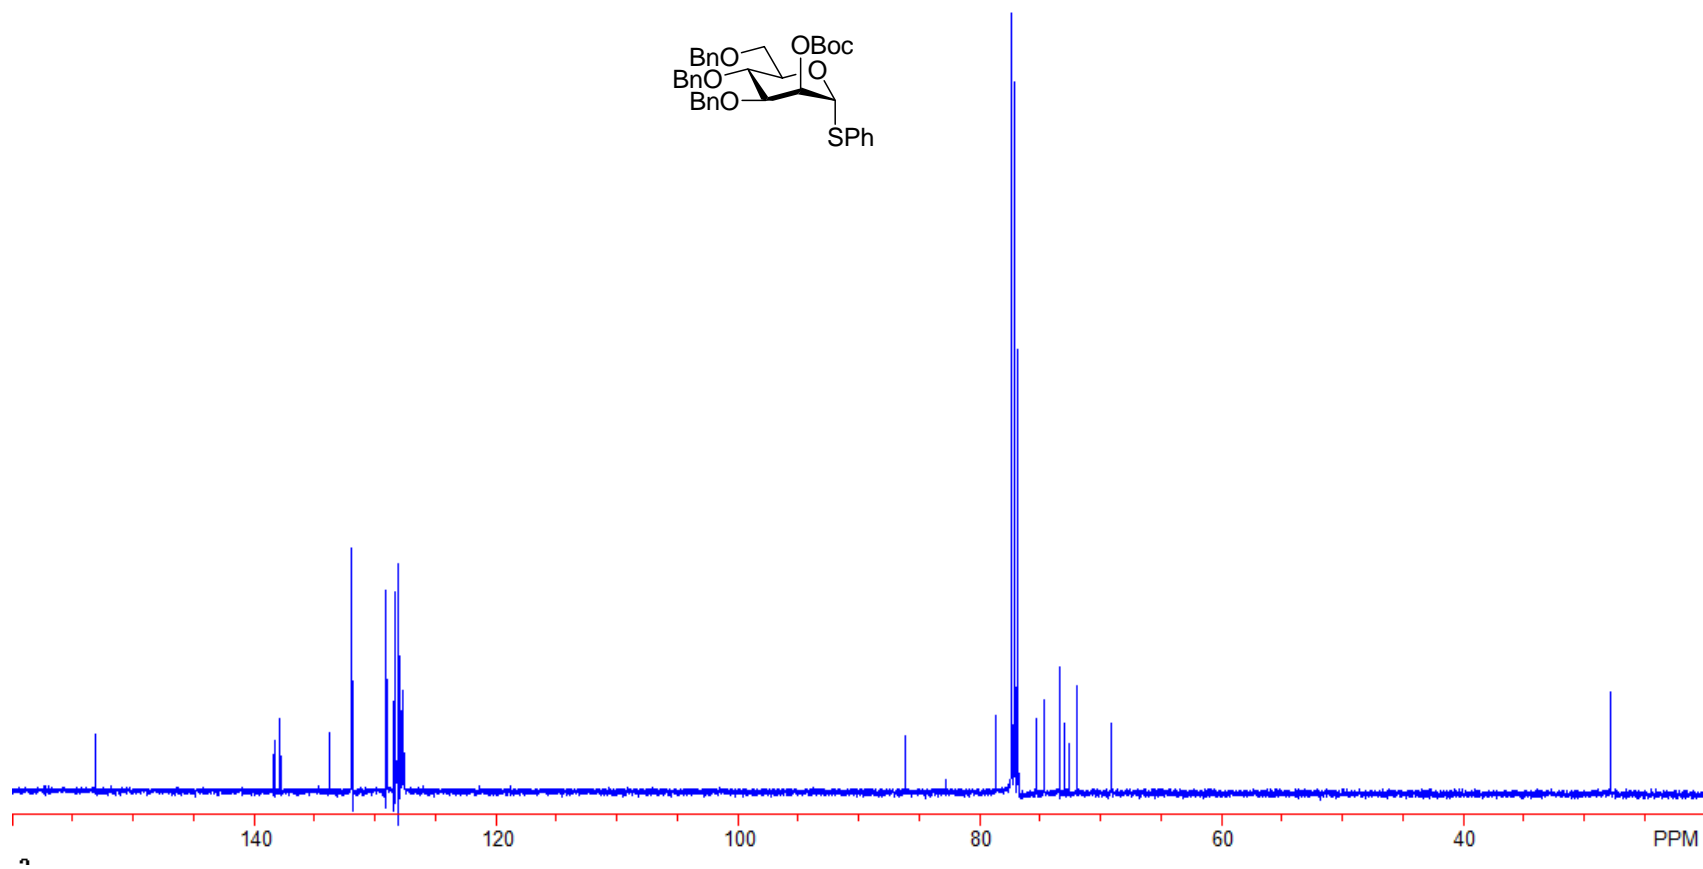

3,4,6-Tri-*O*-benzyl-1,2-*O*-carbonyl- $\alpha$ -D-mannopyranoside (**12**).

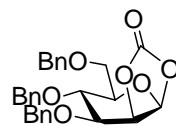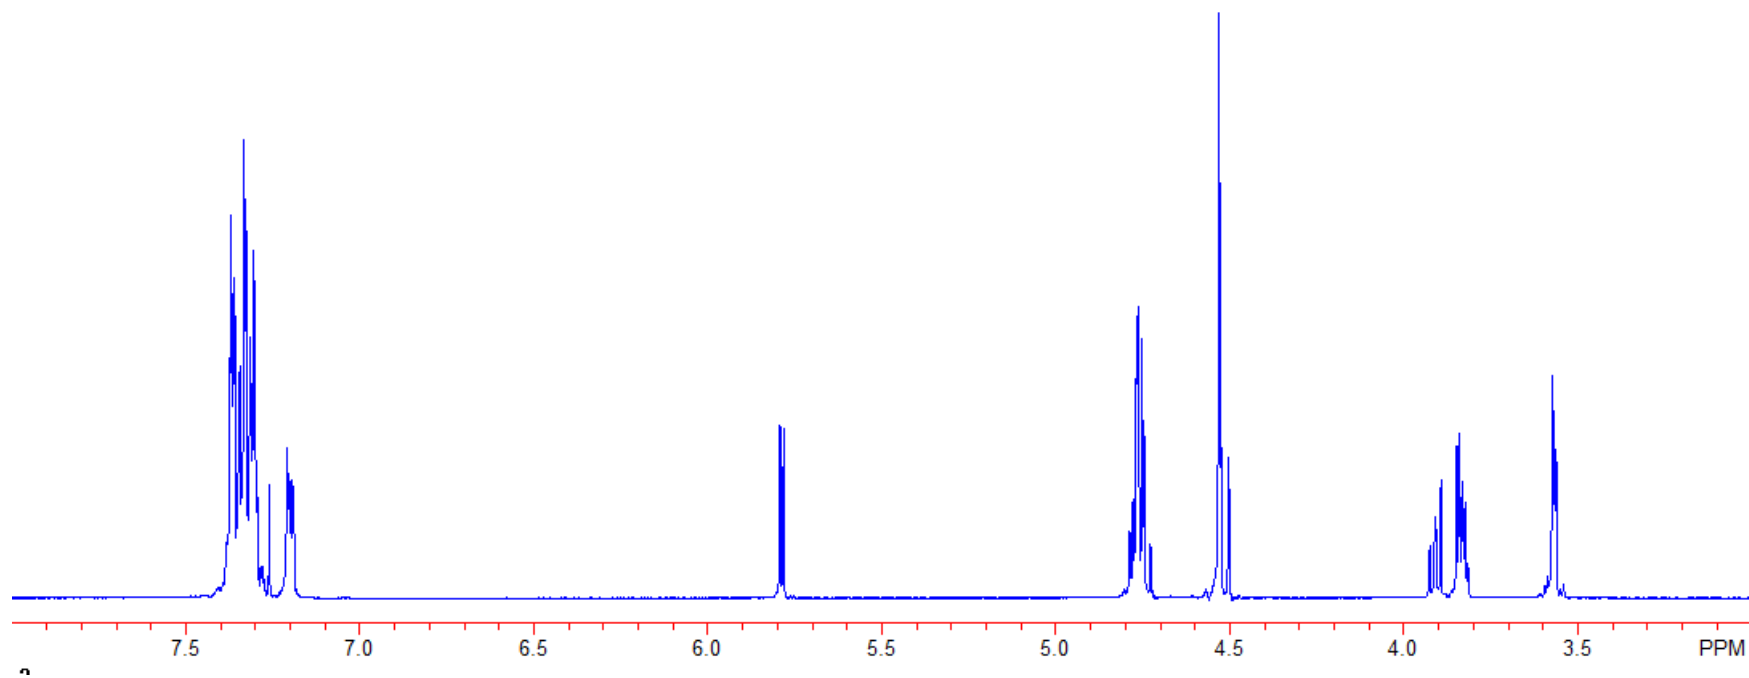

3,4,6-Tri-*O*-benzyl-1,2-*O*-carbonyl- $\alpha$ -D-mannopyranoside (**12**).

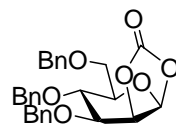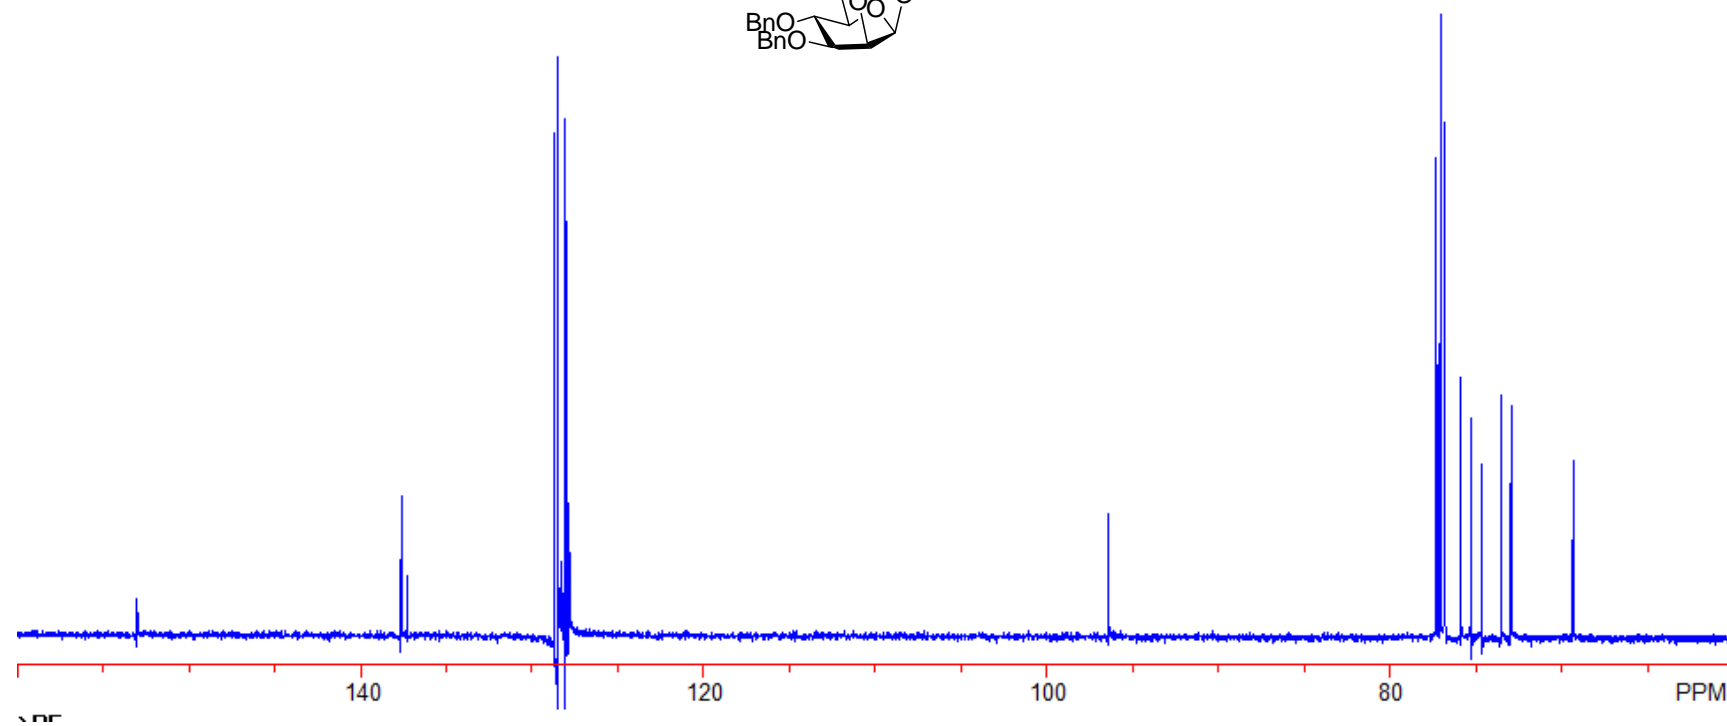

Phenyl 2,4,6-Tri-*O*-benzyl-1-thio- $\beta$ -D-allopyranoside (**14**).

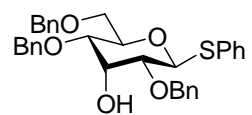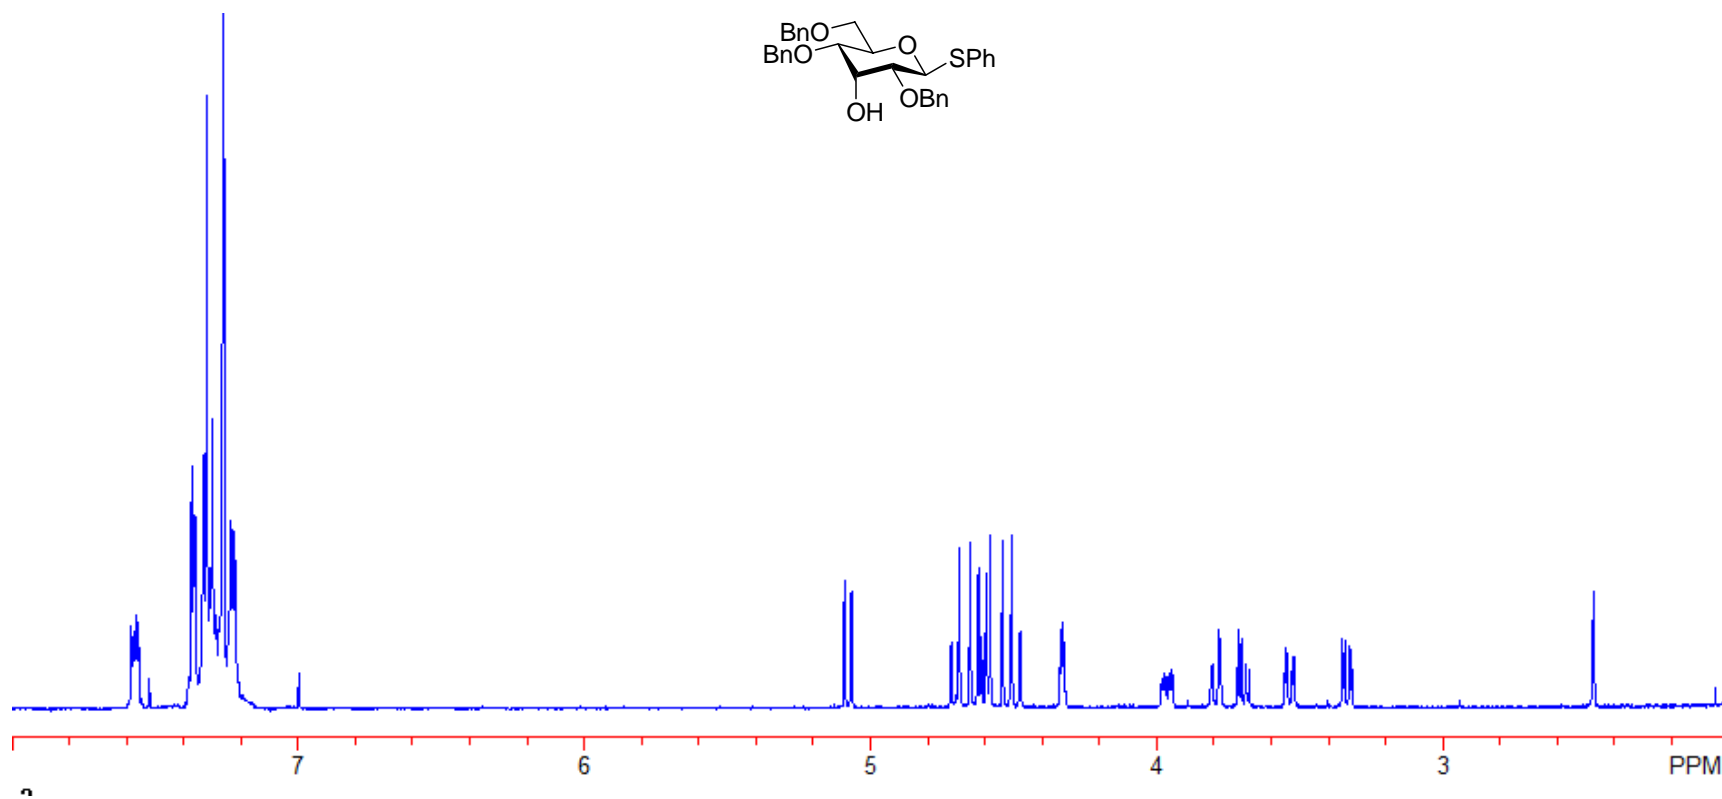

Phenyl 2,4,6-Tri-*O*-benzyl-1-thio- $\beta$ -D-allopyranoside (**14**).

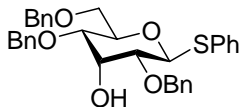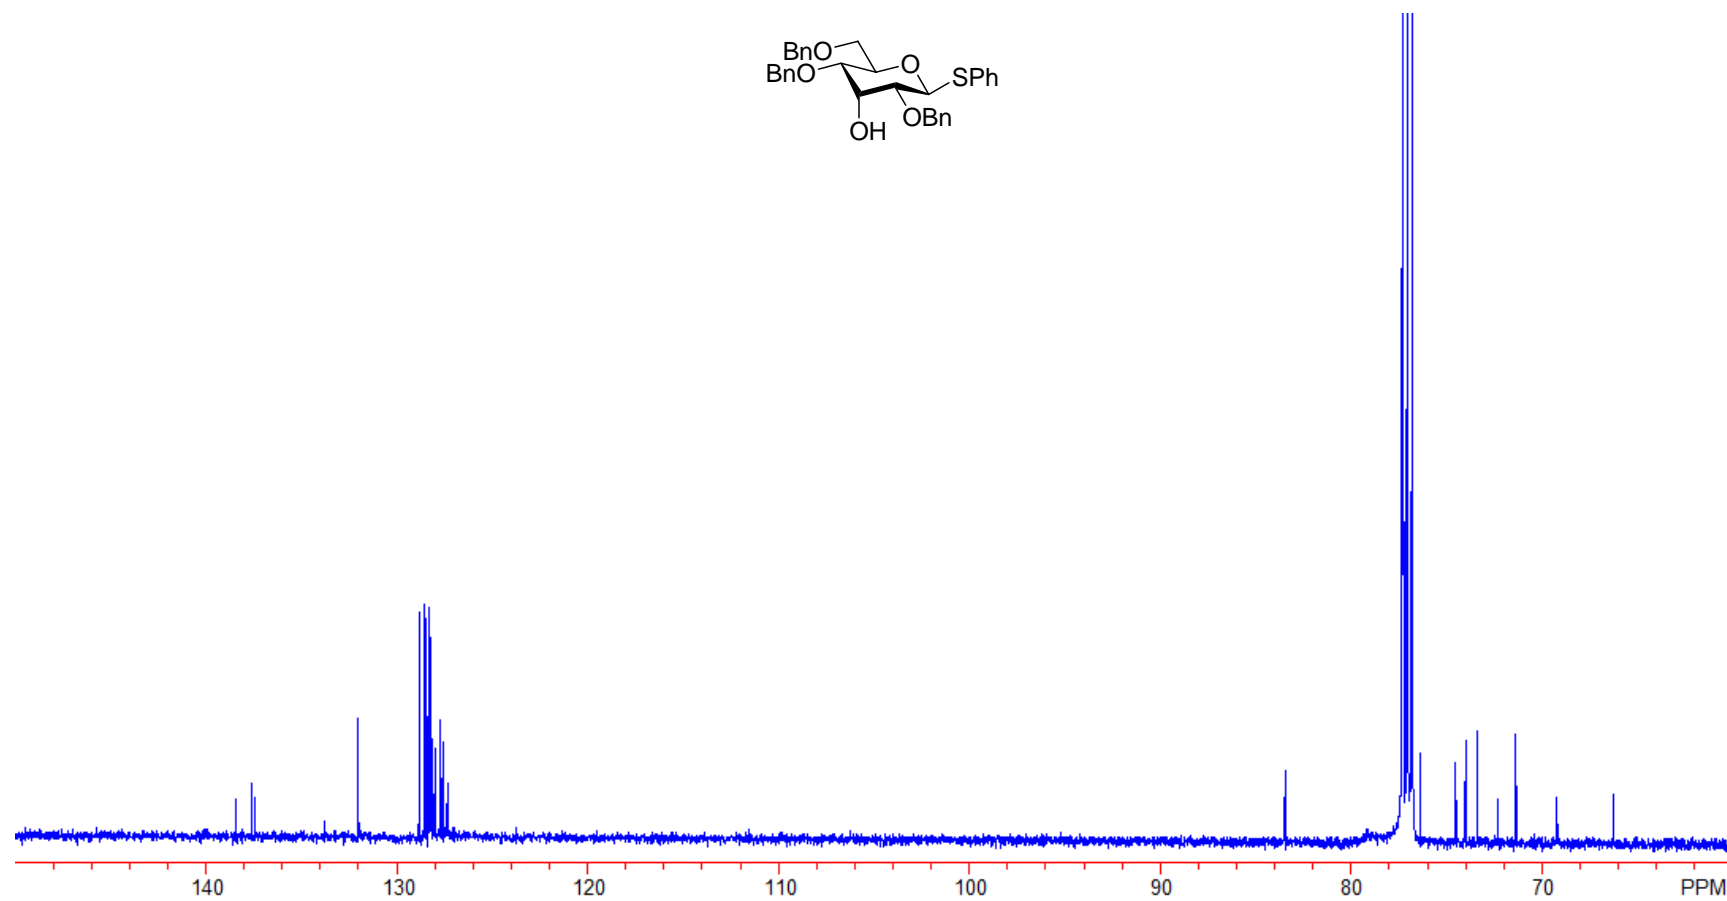

Phenyl 3-*O*-*tert*-butoxycarbonyl-2,4,6-tri-*O*-benzyl-1-thio- $\beta$ -D-allopyranoside (**15**).

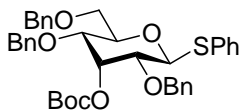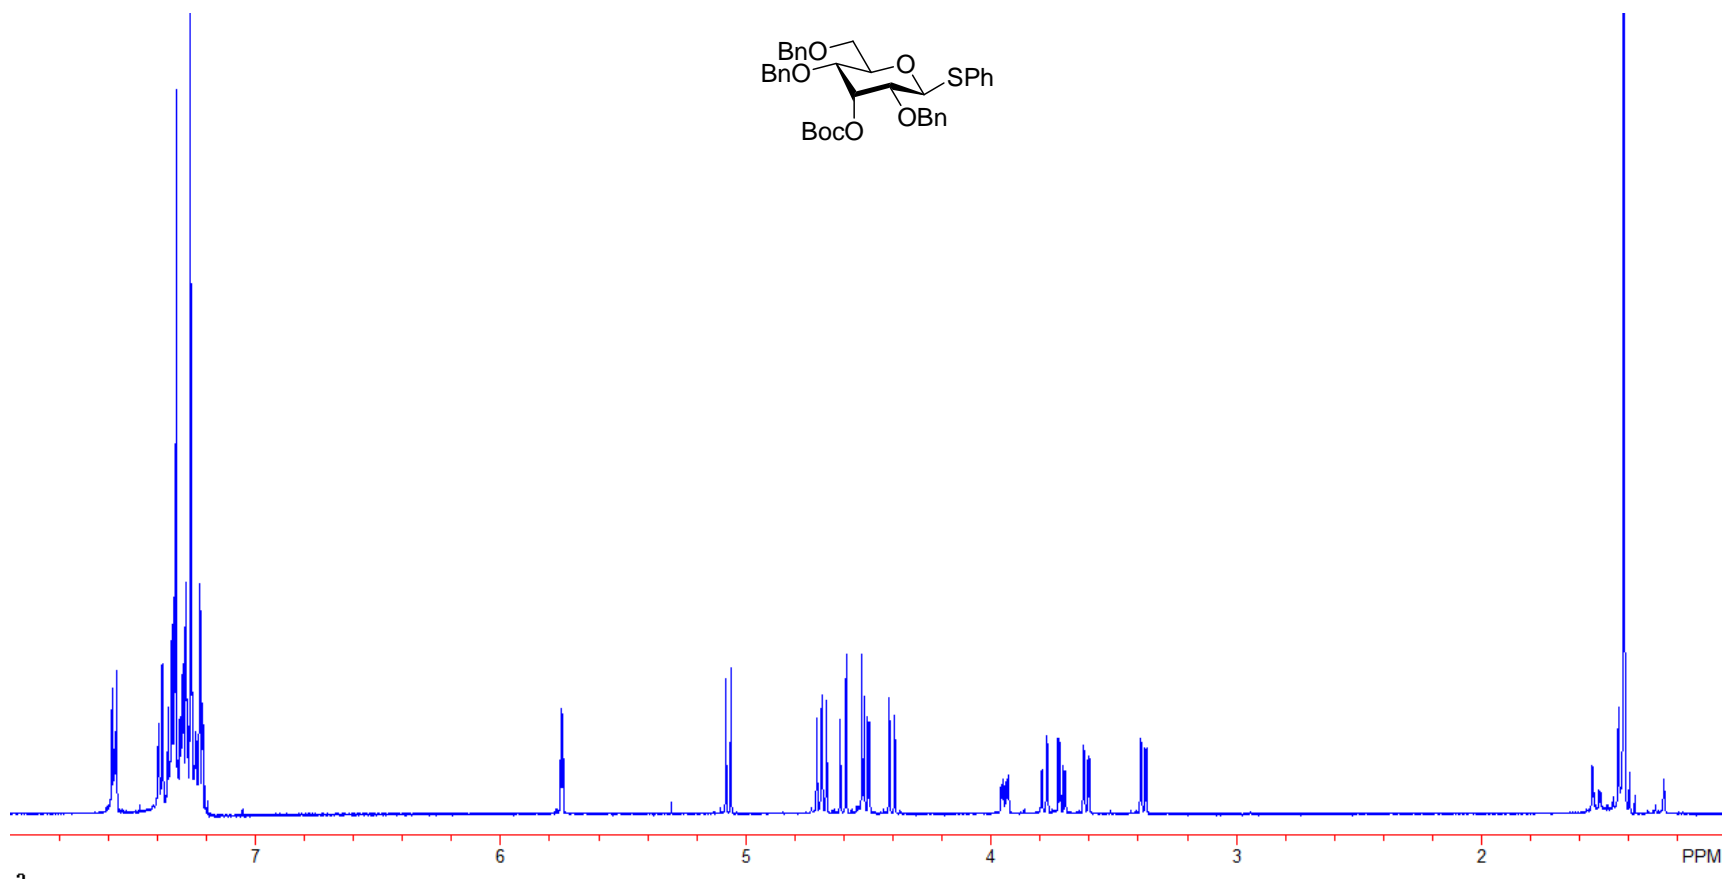

Phenyl 3-*O*-*tert*-butoxycarbonyl-2,4,6-tri-*O*-benzyl-1-thio- $\beta$ -D-allopyranoside (**15**).

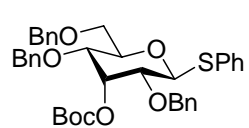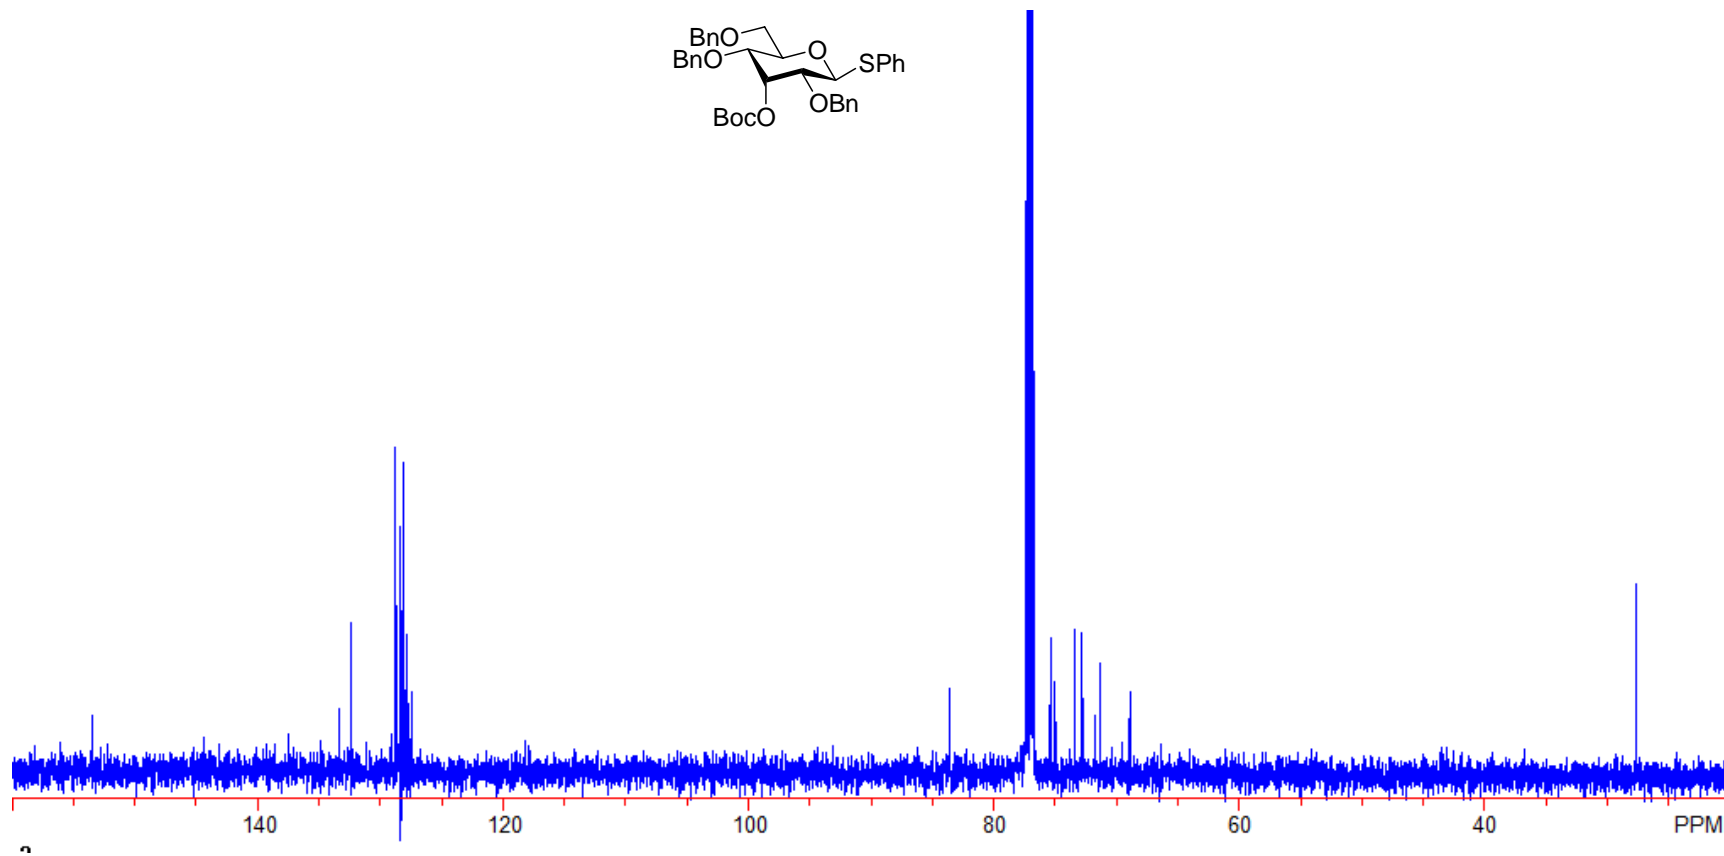

2,4,6-Tri-*O*-benzyl-1,3-*O*-carbonyl- $\alpha$ -D-allose (**16**).

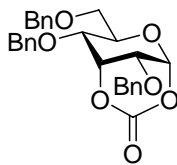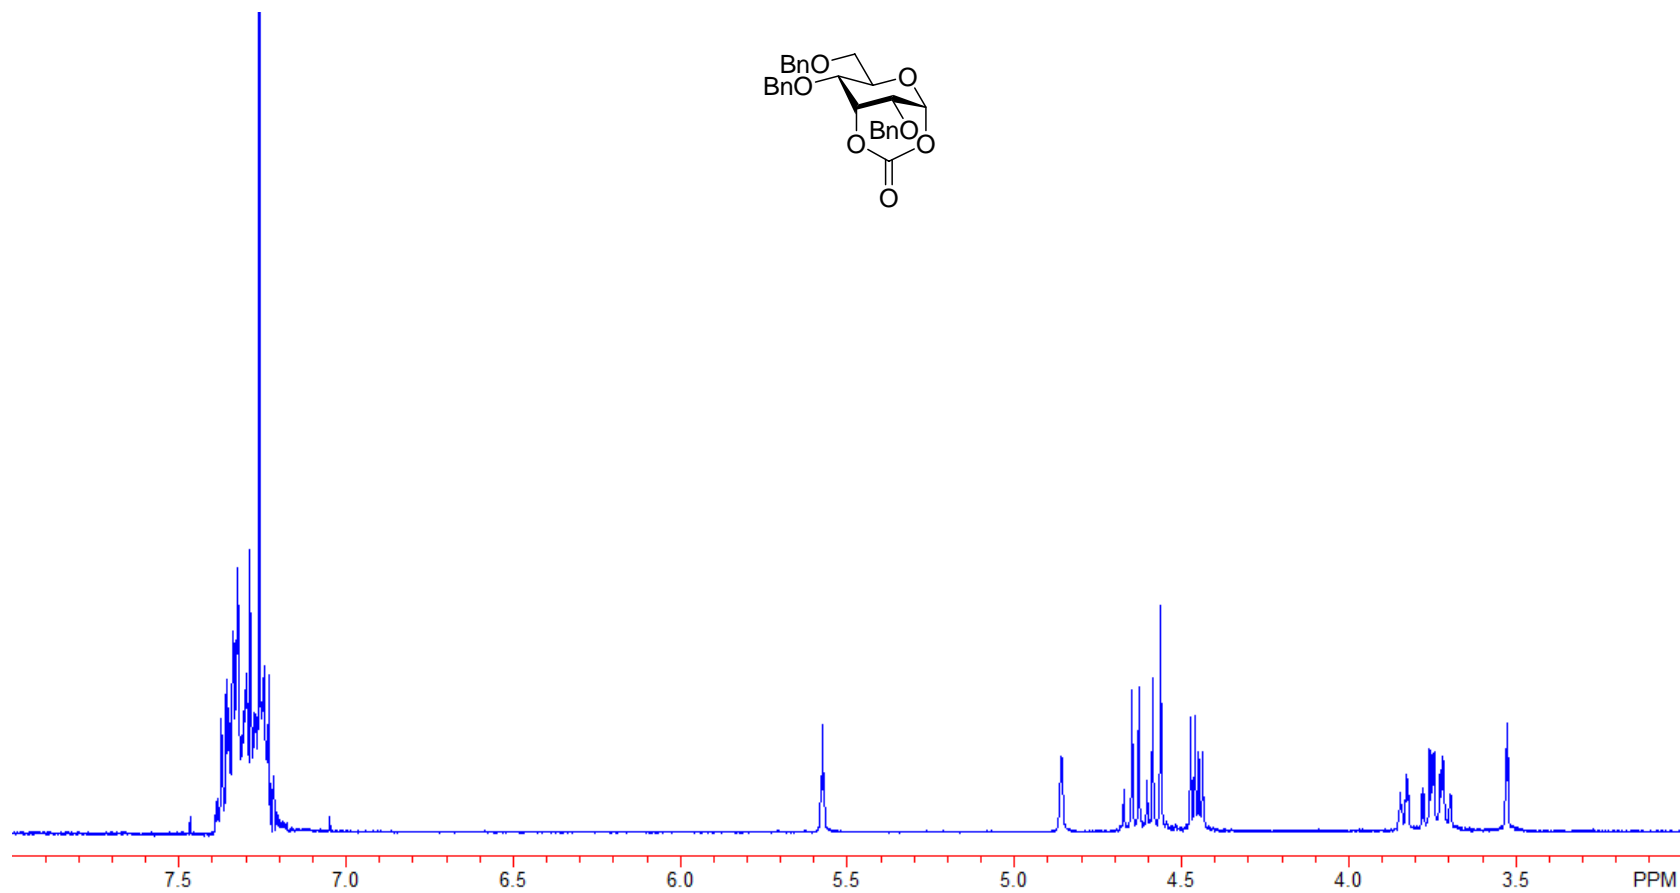



2,4,6-Tri-*O*-benzyl-1,3-*O*-carbonyl- $\alpha$ -D-allose (**16**).

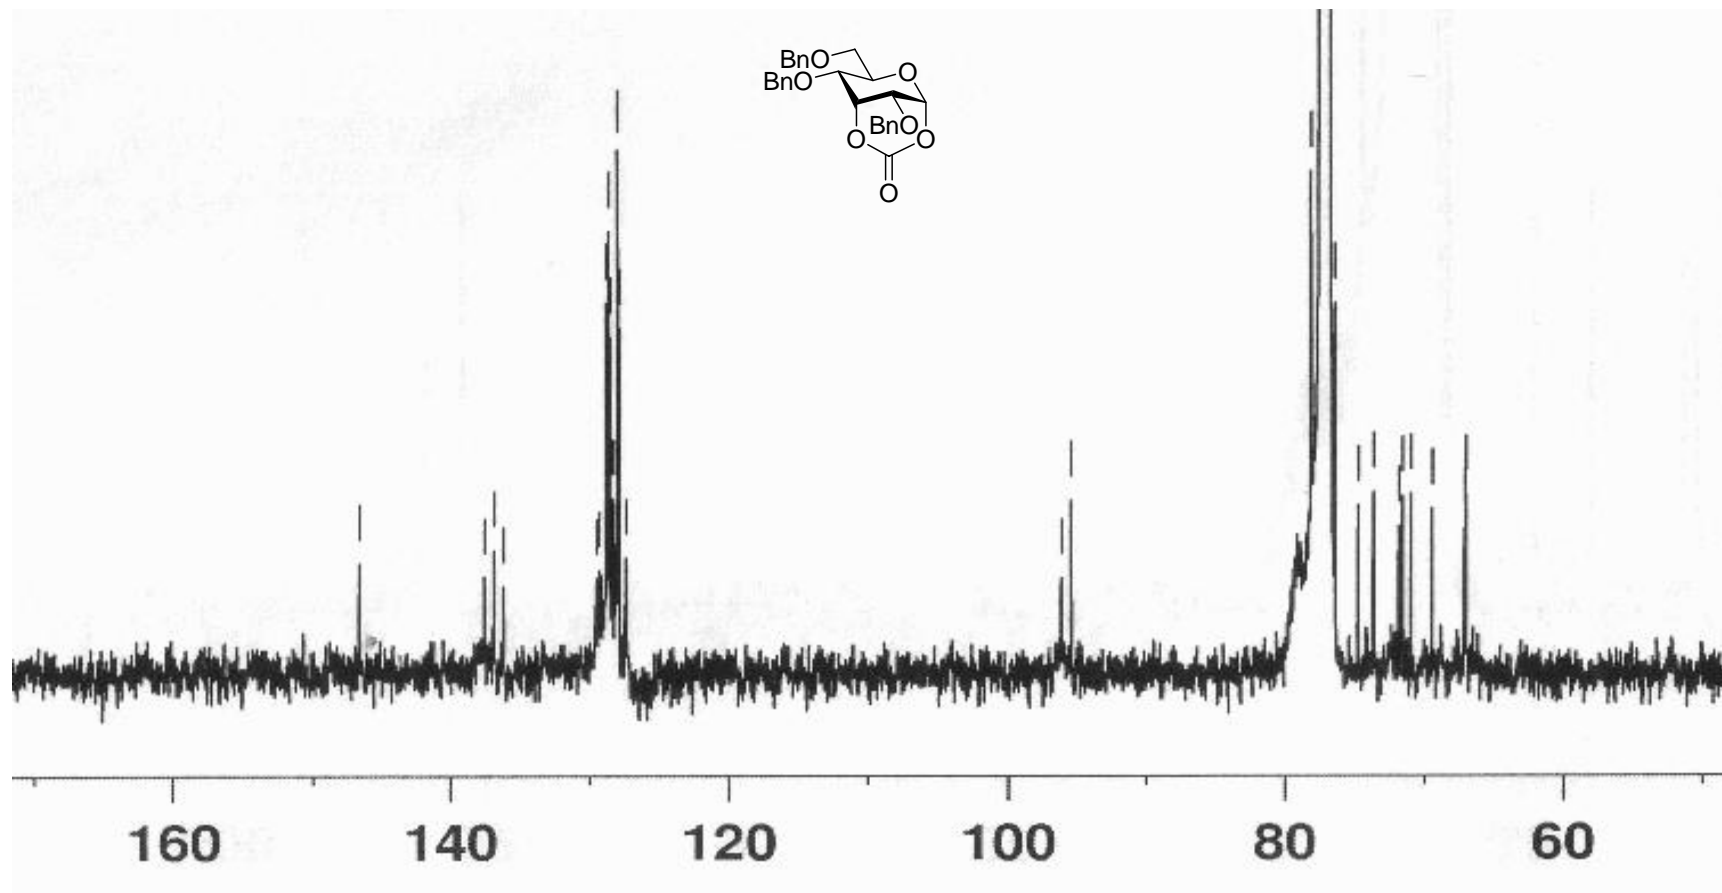







Cyclohexyl 3-*O*-*tert*-butoxycarbonyl-2,4,6-*O*-benzyl- $\beta$ -D-allopyranoside (**17 $\beta$** ).

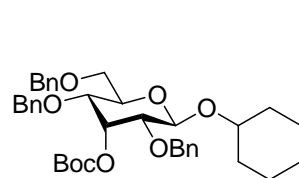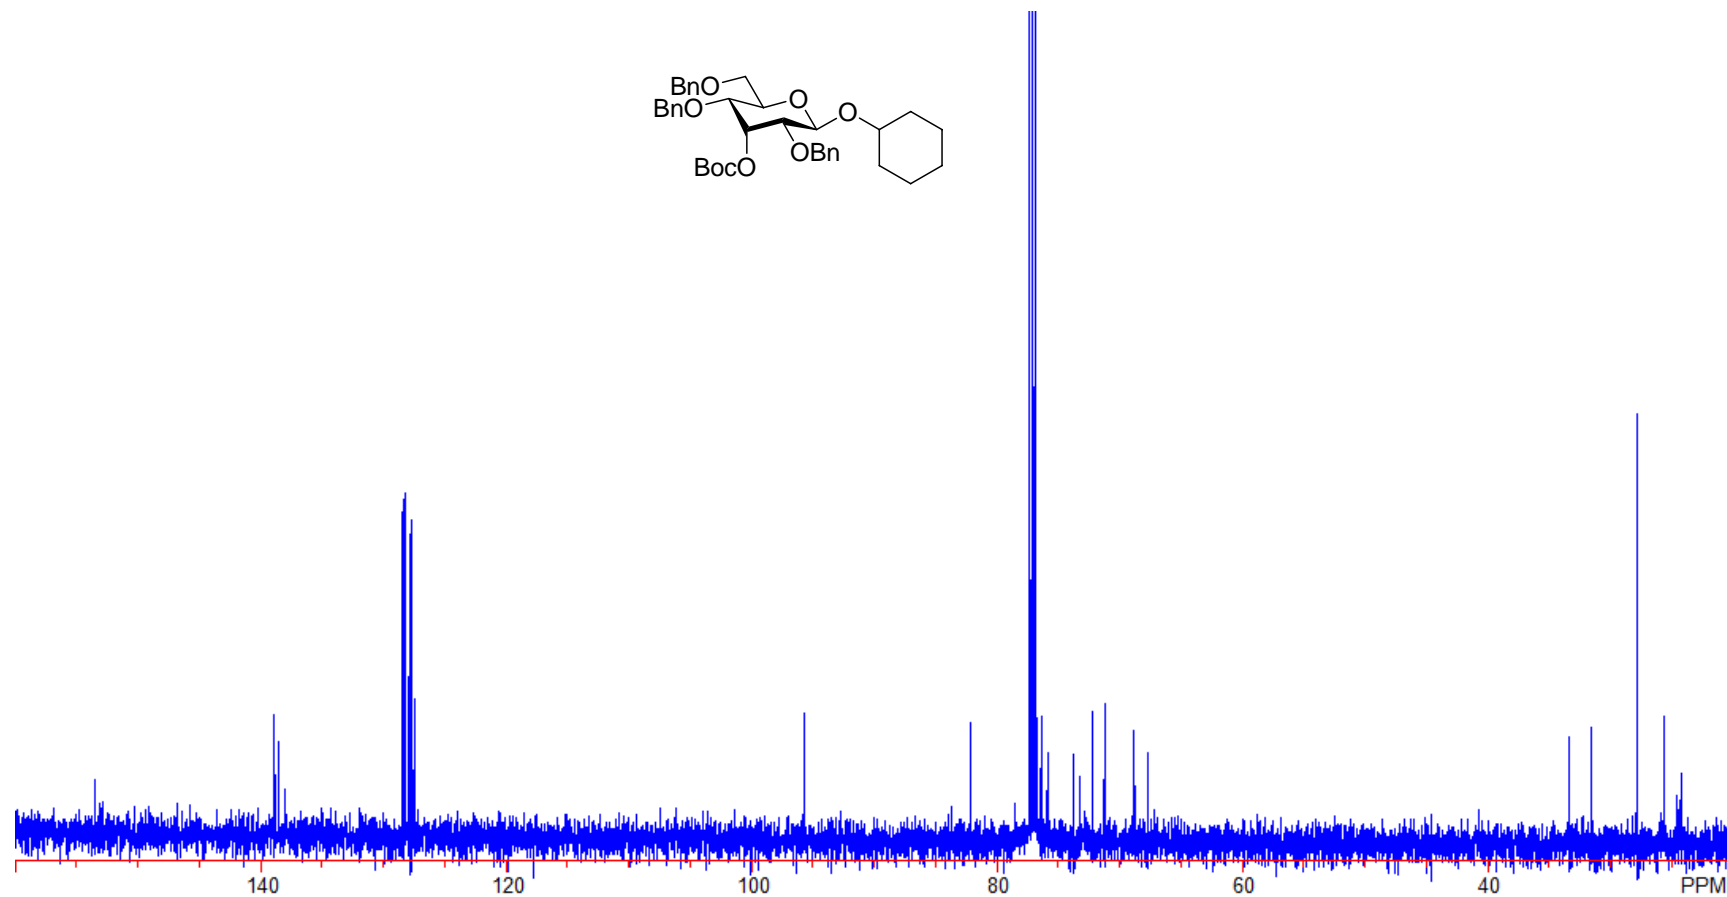

3-*O*-*tert*-butoxycarbonyl-2,4,6-tri-*O*-benzyl-D-allose (**18**).

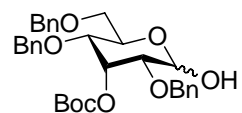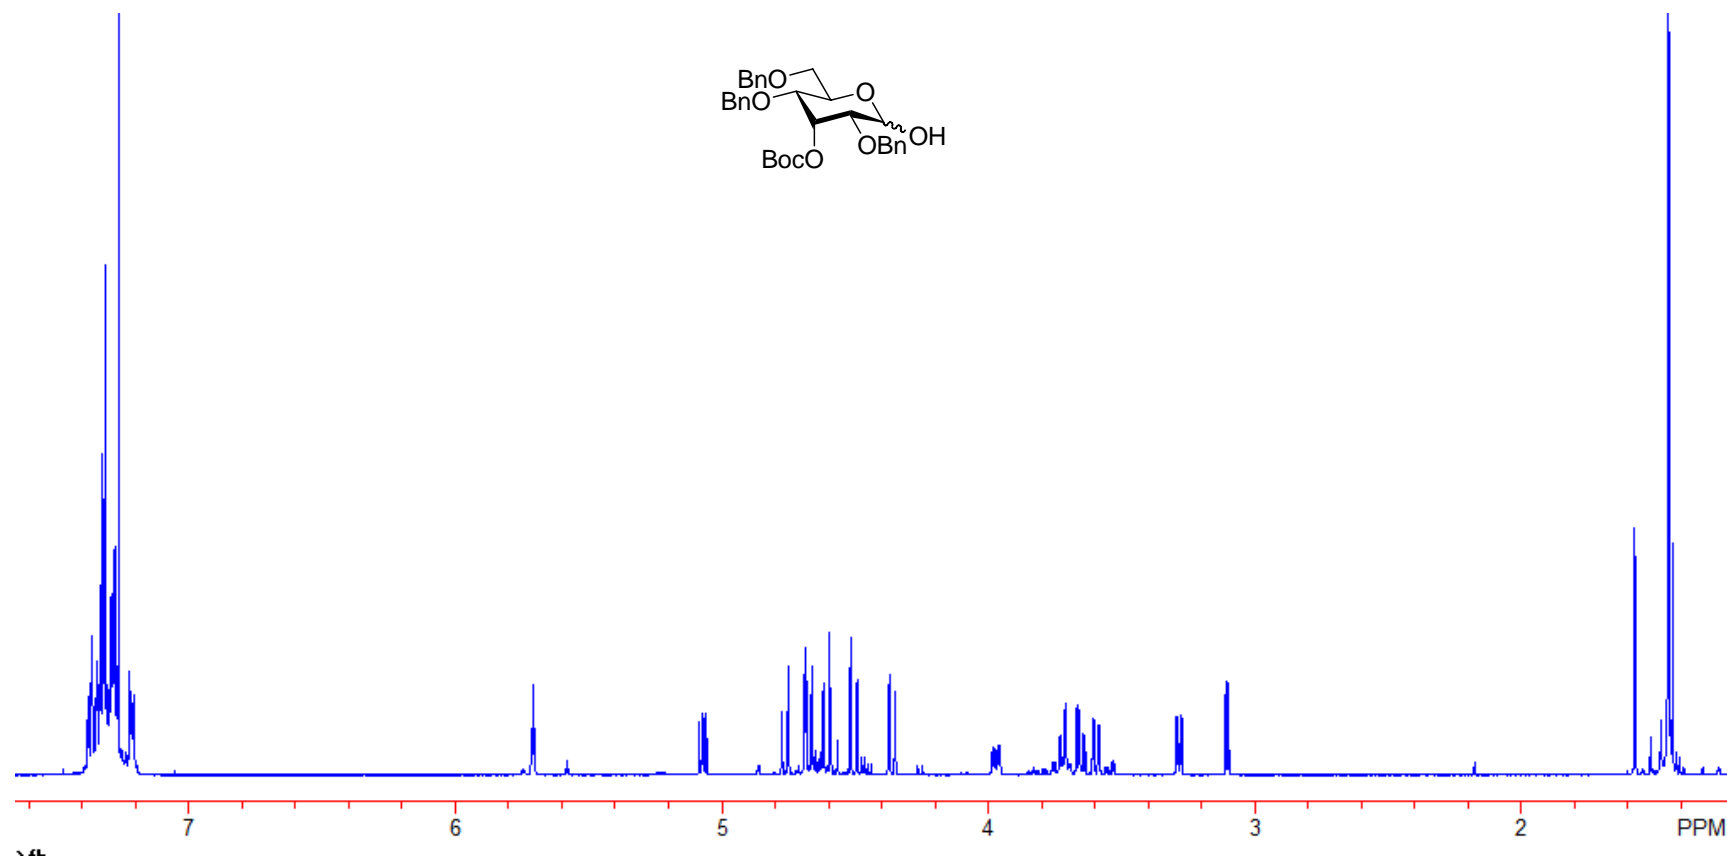

3-*O*-*tert*-butoxycarbonyl-2,4,6-tri-*O*-benzyl-D-allose (**18**).

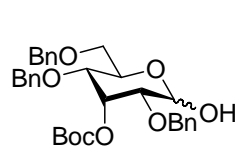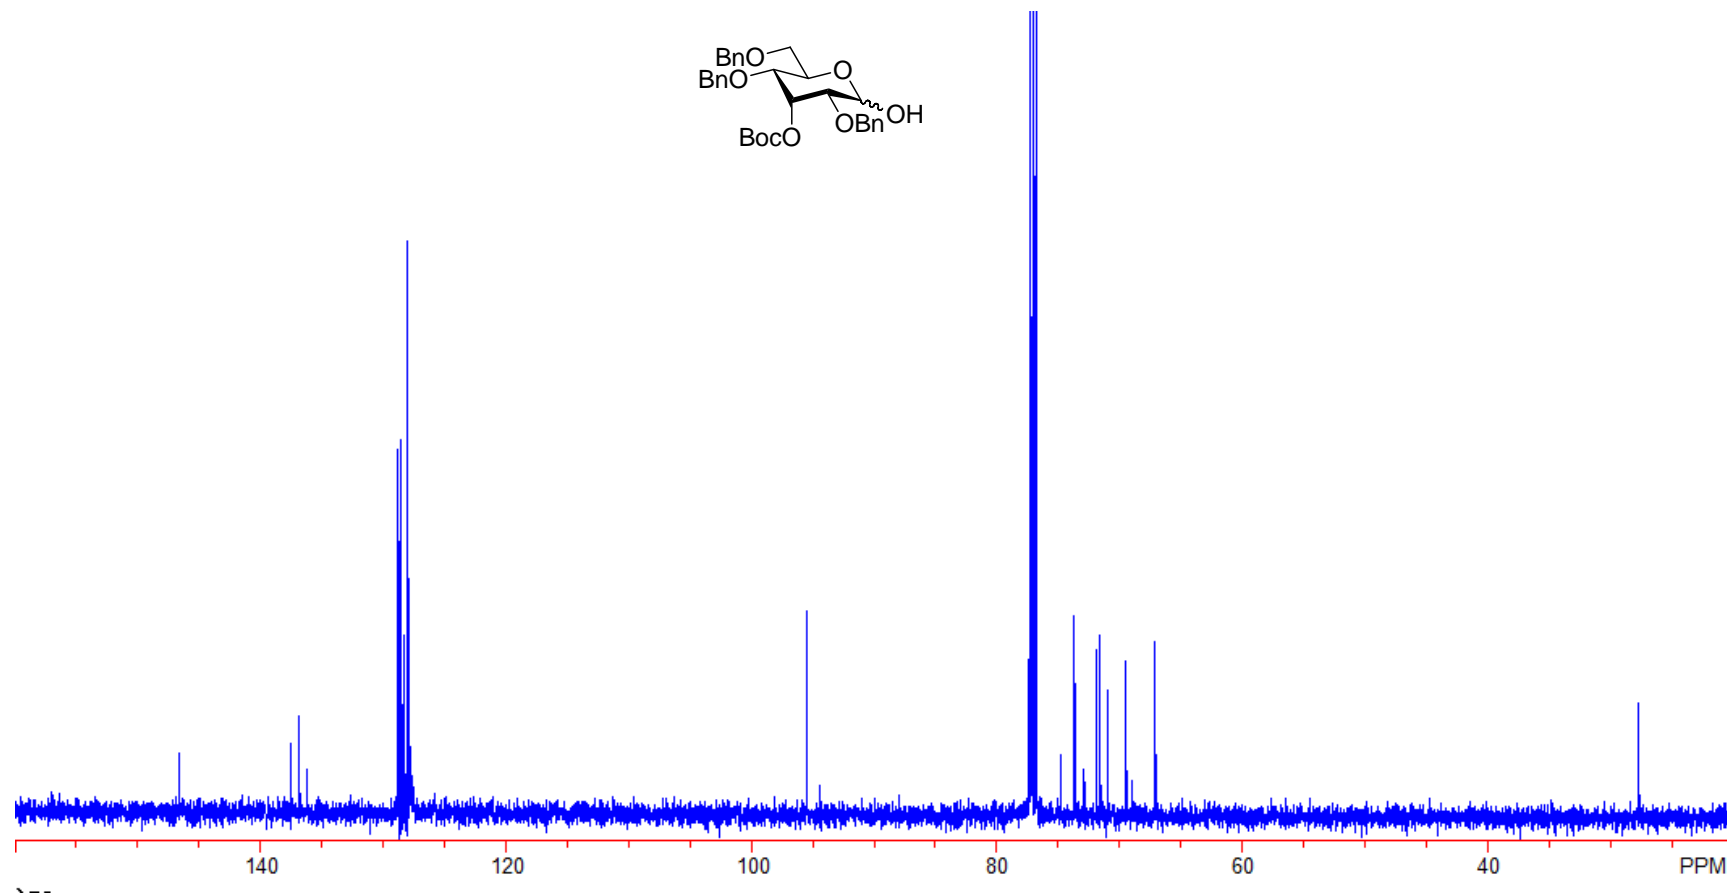

Phenyl 3-*O*-*tert*-butoxycarbonyl-2-*O*-benzyl-4,6-*O*-benzylidene-1-thio- $\alpha$ -D-mannopyranoside (**21**).

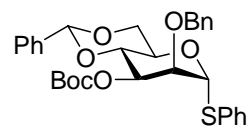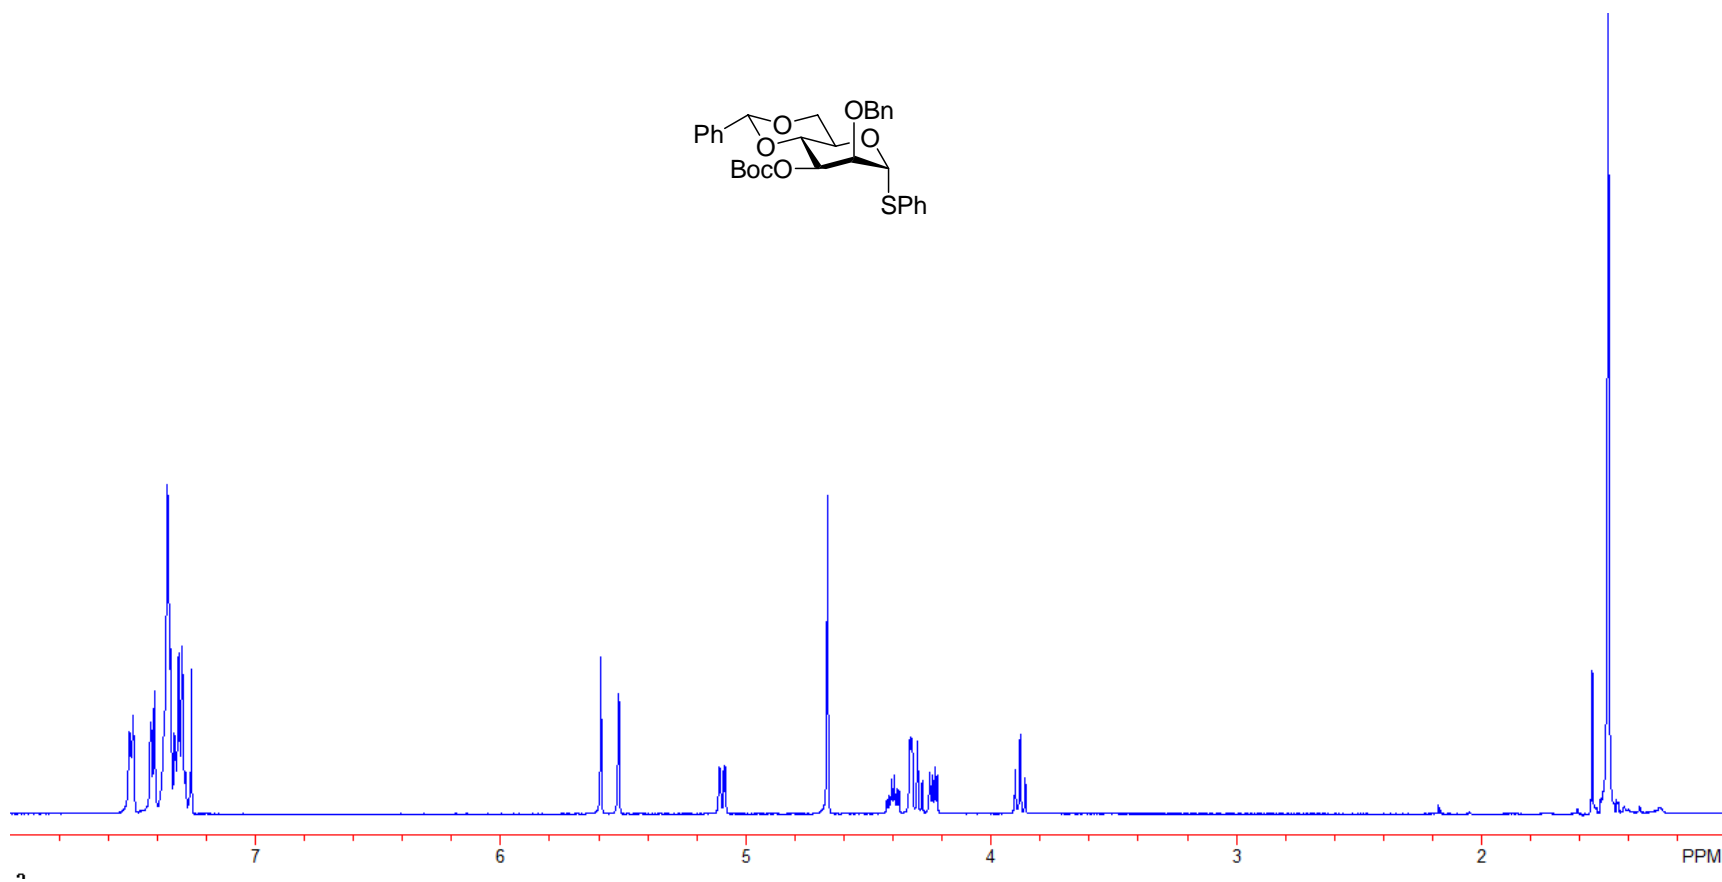



Phenyl 3-*O*-*tert*-butoxycarbonyl-2-*O*-benzyl-4,6-*O*-benzylidene-1-thio- $\alpha$ -D-mannopyranoside (**21**).

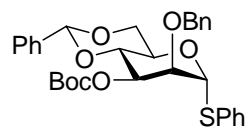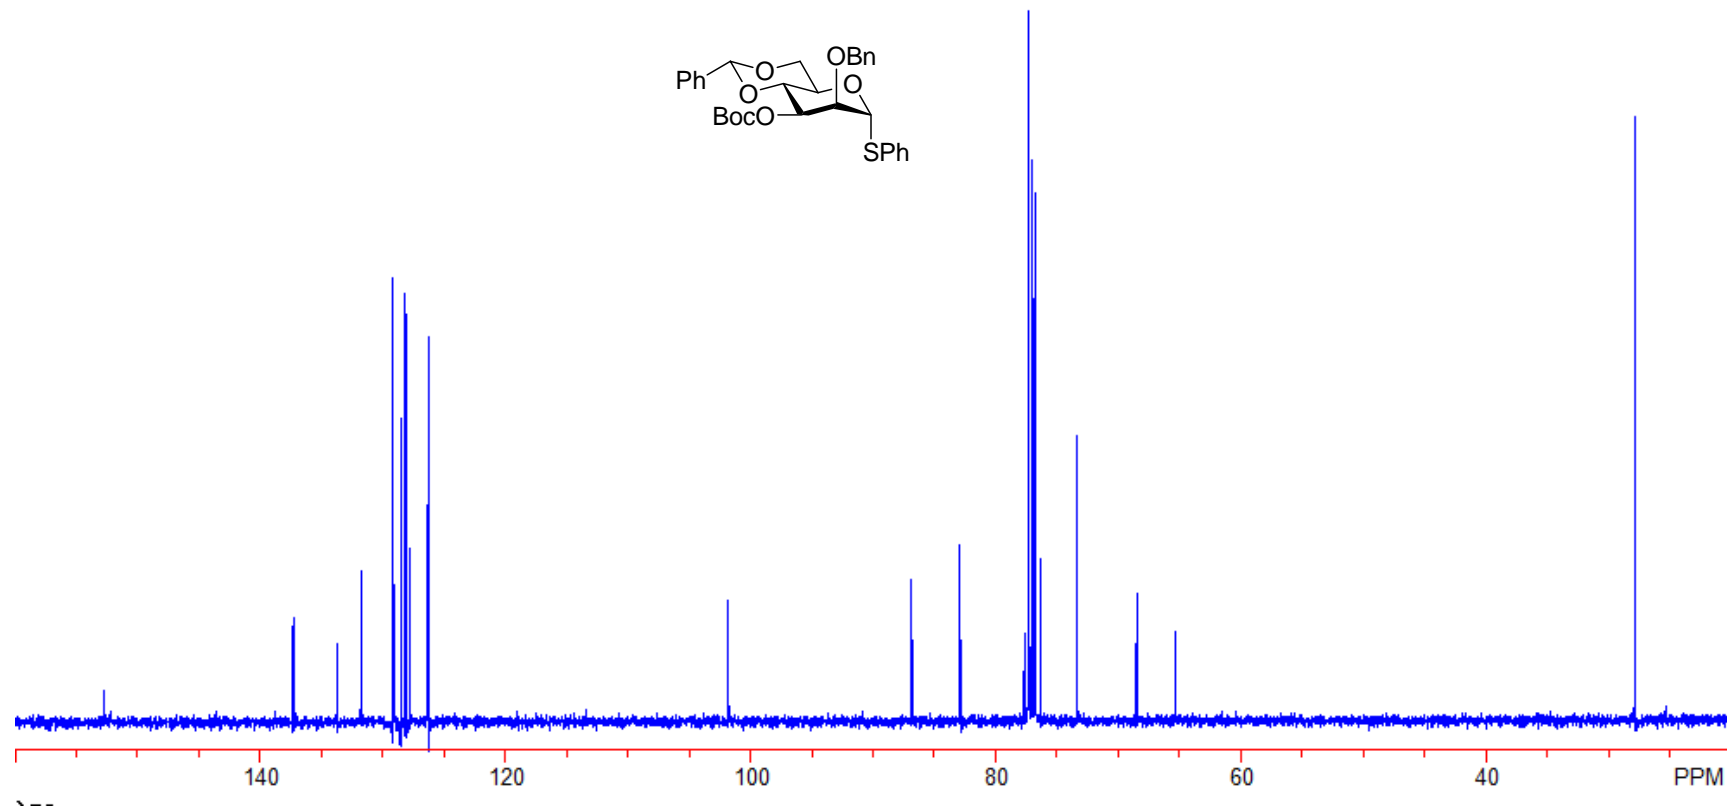

Phenyl 3-*O*-*tert*-butoxycarbonyl-2-*O*-benzyl-4,6-*O*-benzylidene-1-thio- $\alpha$ -D-mannopyranoside *S*-Oxide (**22**).

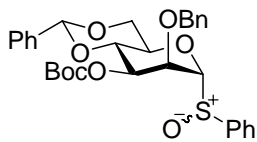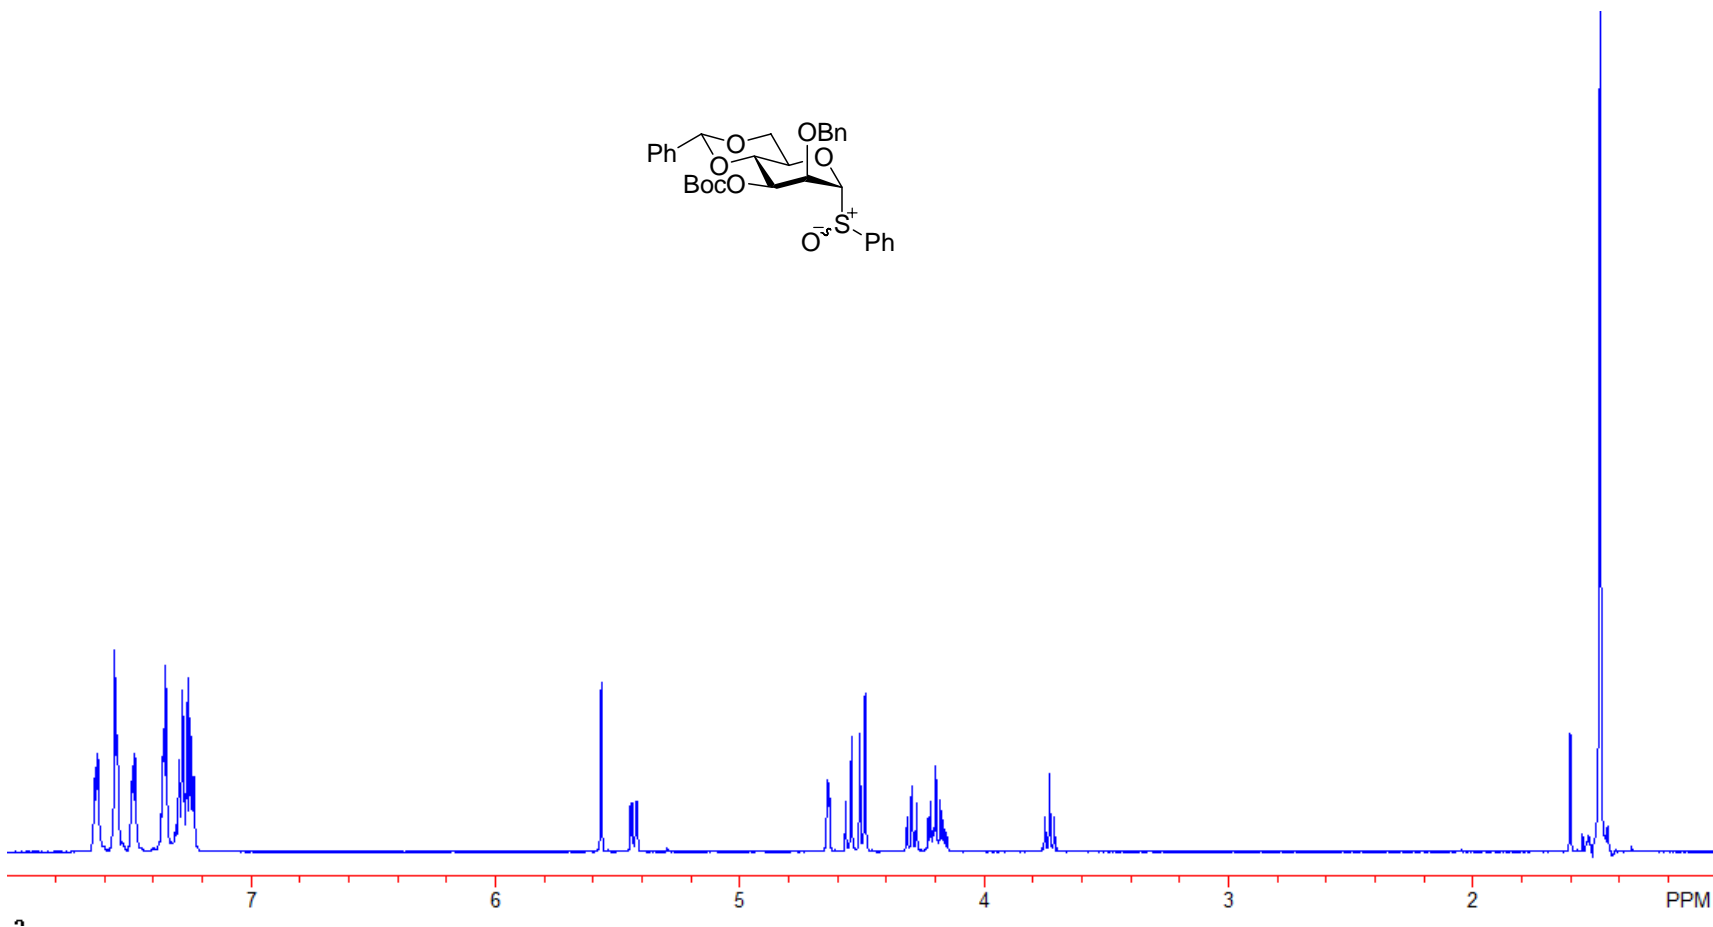

Phenyl 3-*O*-*tert*-butoxycarbonyl-2-*O*-benzyl-4,6-*O*-benzylidene-1-thio- $\alpha$ -D-mannopyranoside *S*-Oxide (**22**).

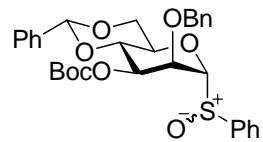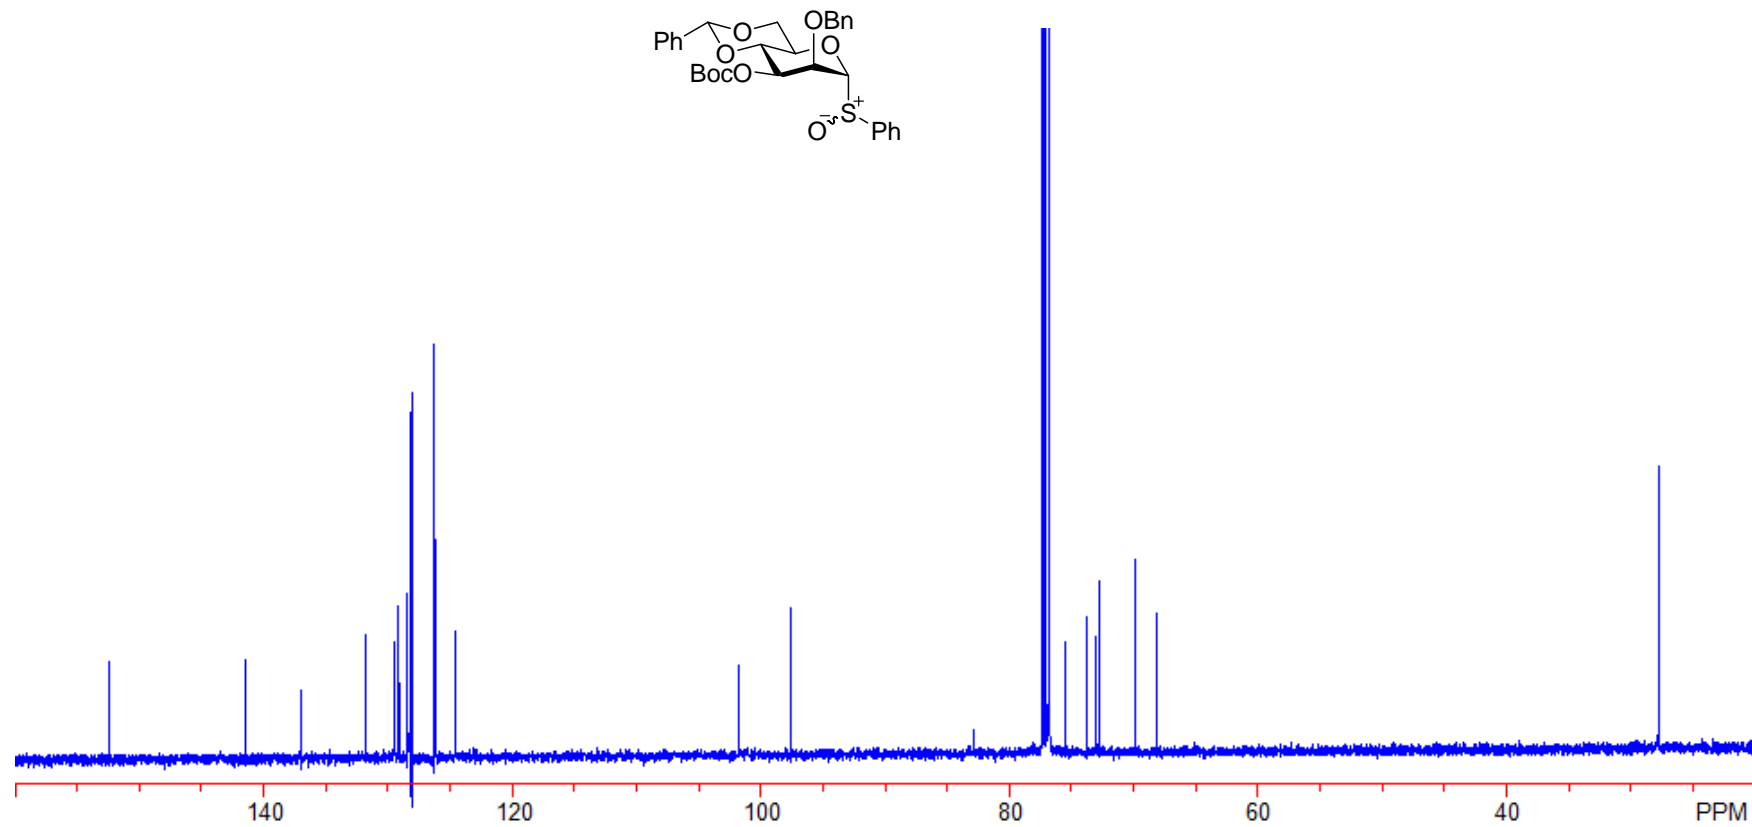

Cyclohexyl 3-*O*-*tert*-butoxycarbonyl-2-*O*-benzyl-4,6-*O*-benzylidene- $\alpha$ -D-mannopyranoside (**23**).

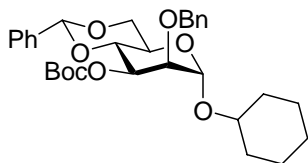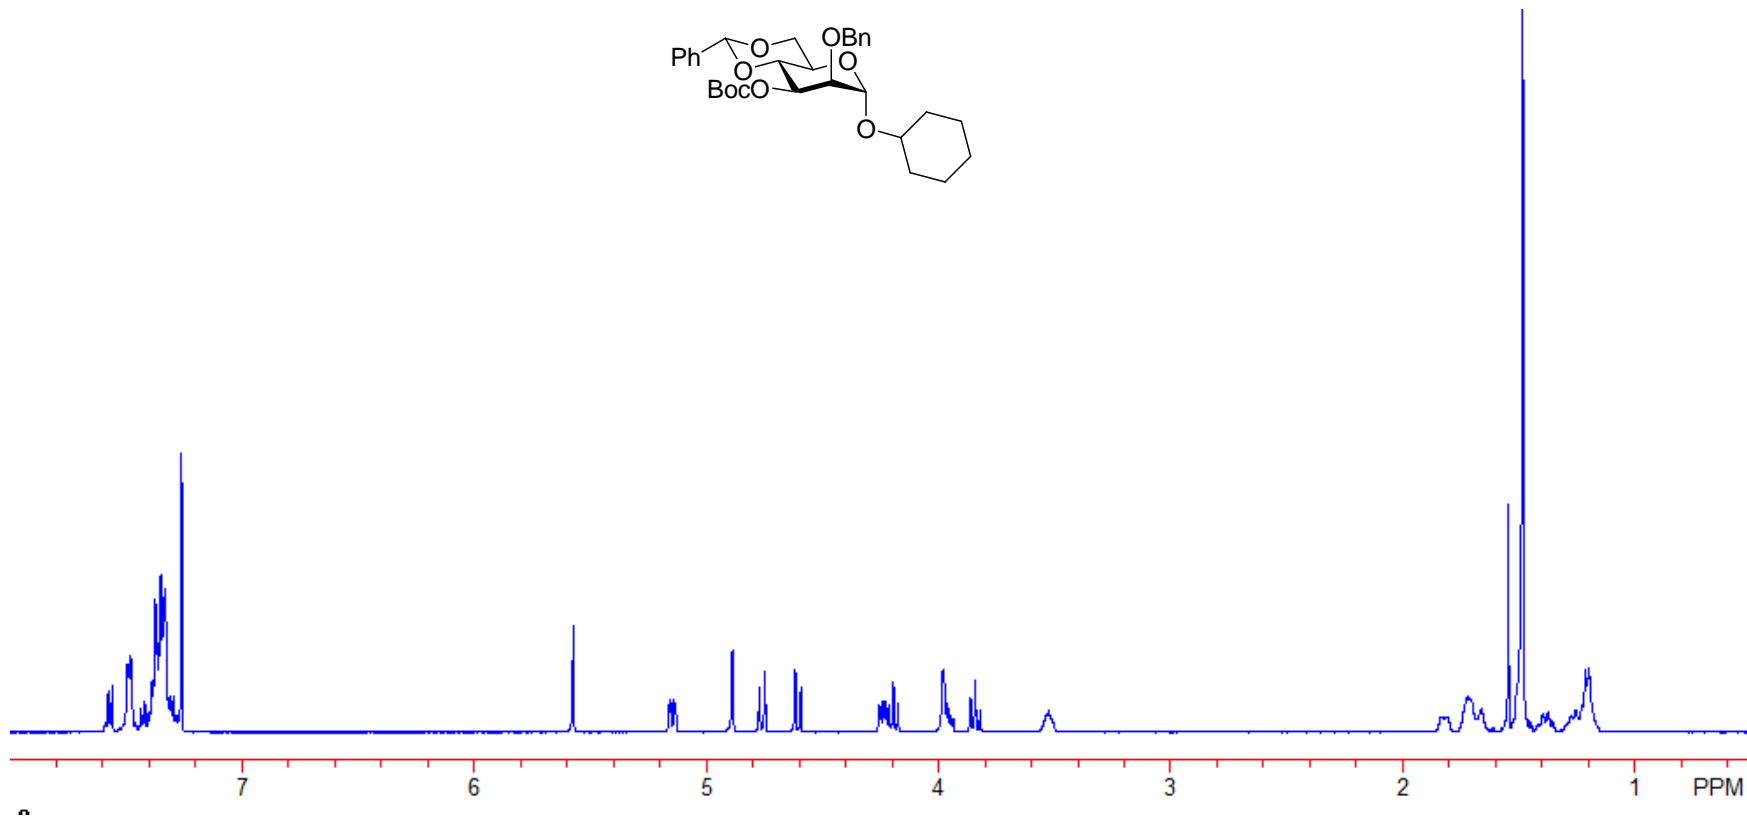

Cyclohexyl 3-*O*-*tert*-butoxycarbonyl-2-*O*-benzyl-4,6-*O*-benzylidene- $\alpha$ -D-mannopyranoside (**23**).

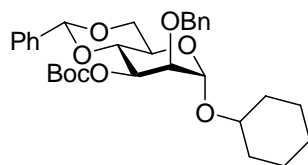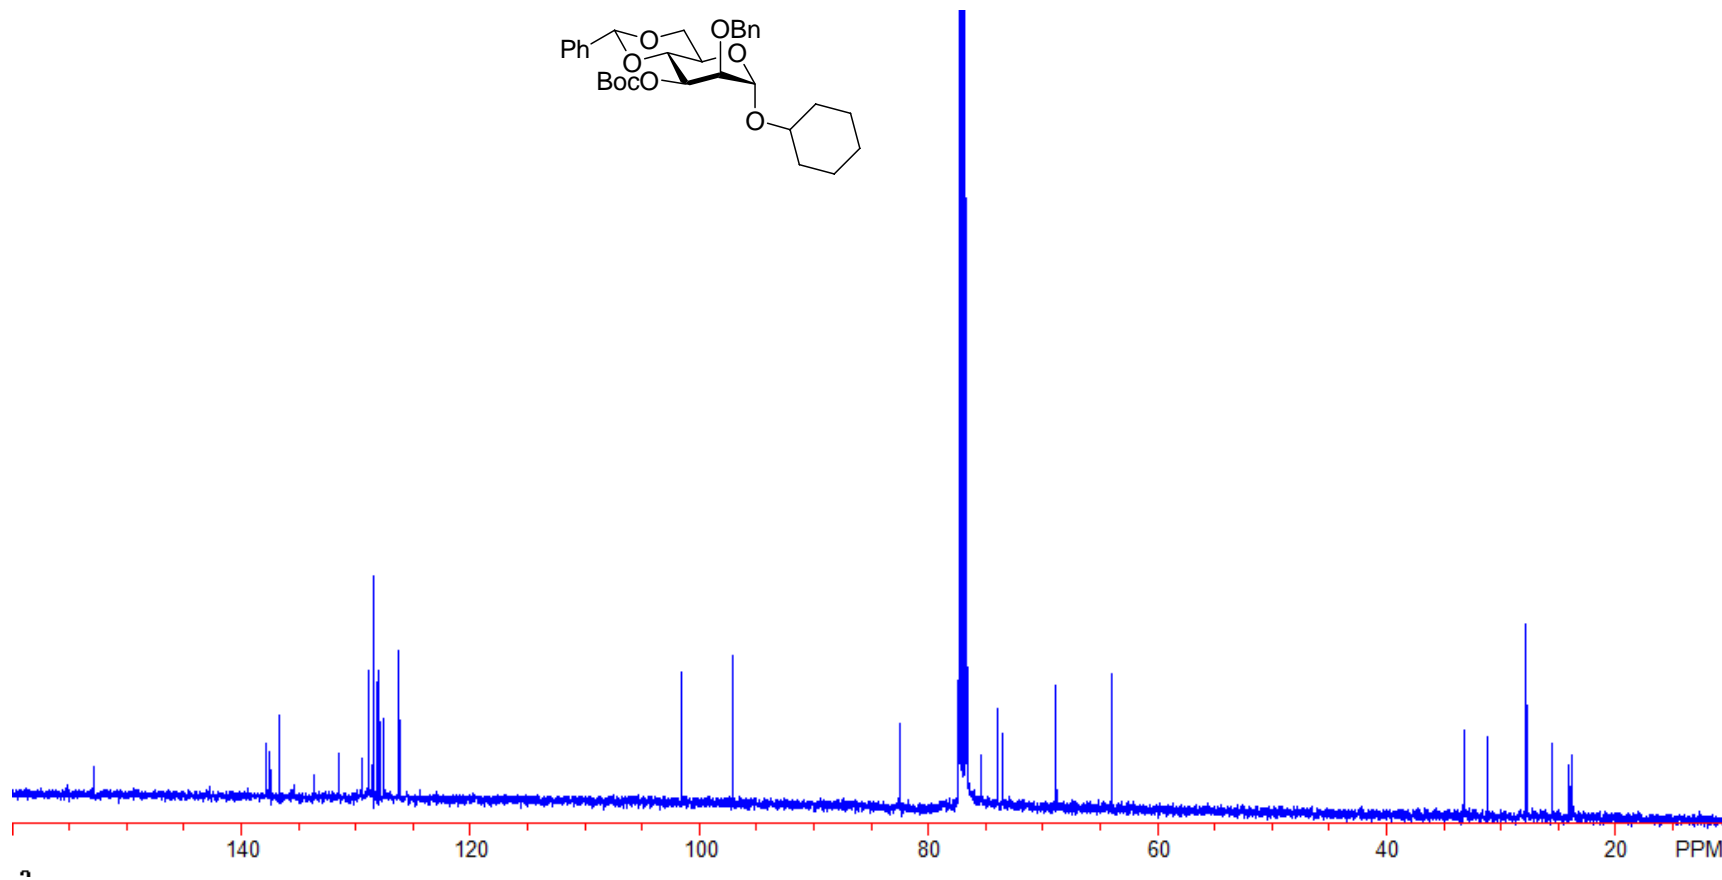

Ethyl 4-*O*-*tert*-butoxycarbonyl-2,3,6-tri-*O*-benzyl-1-thio- $\beta$ -D-galactopyranoside (**24**).

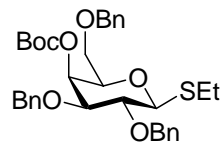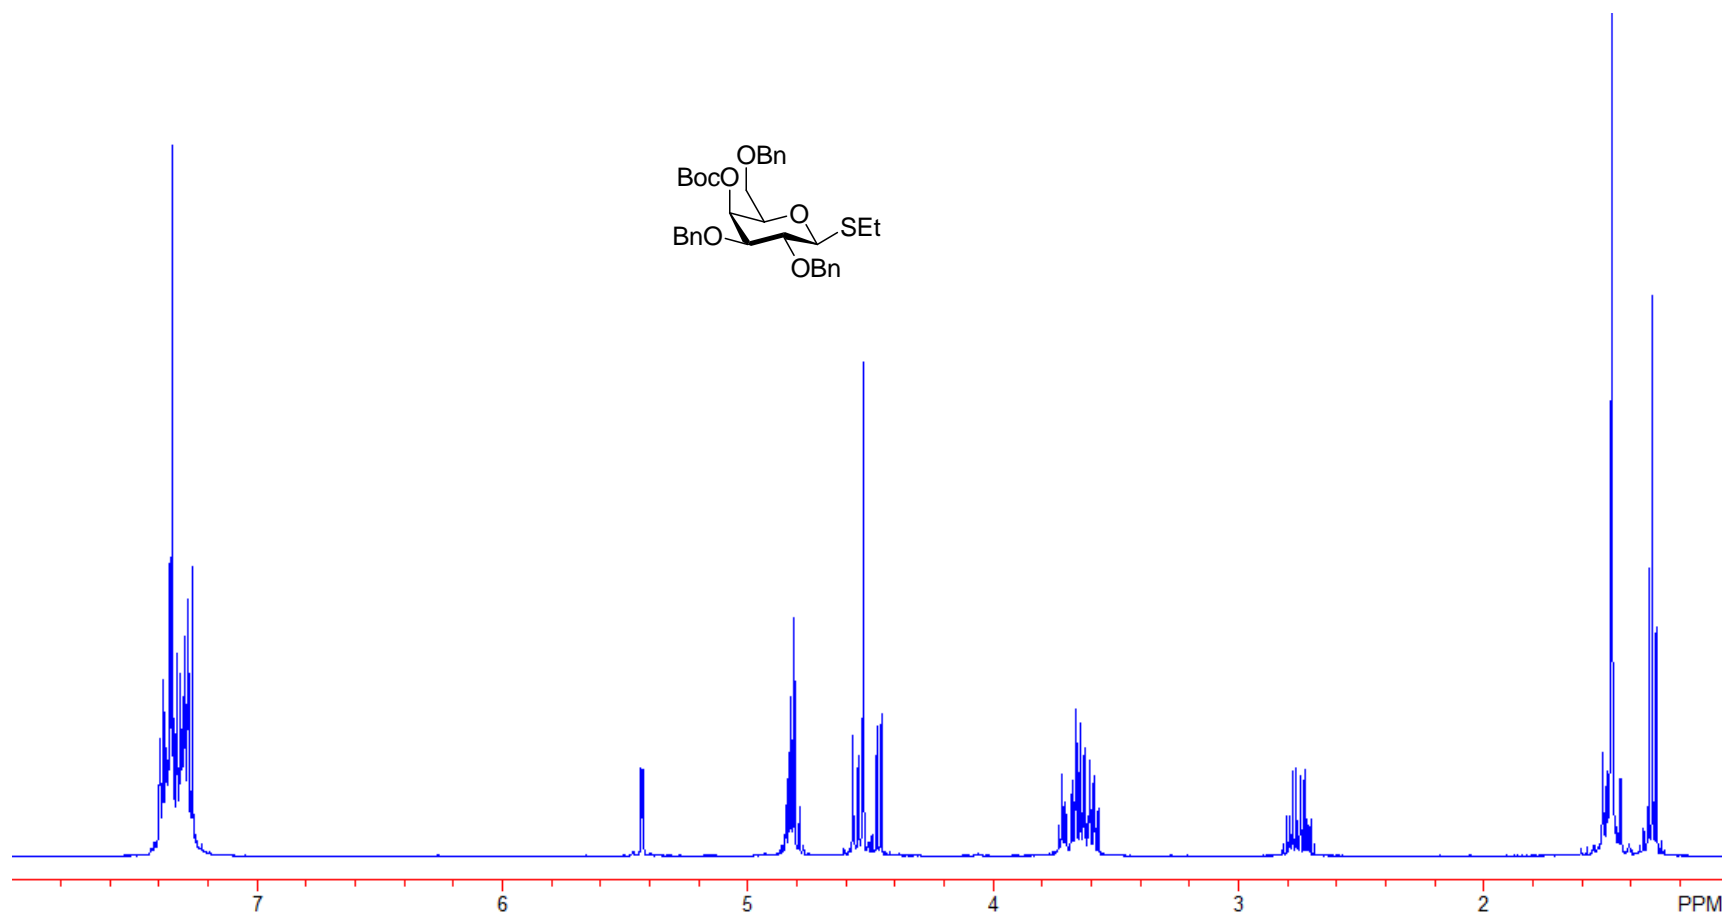

Ethyl 4-*O*-*tert*-butoxycarbonyl-2,3,6-tri-*O*-benzyl-1-thio- $\beta$ -D-galactopyranoside (**24**).

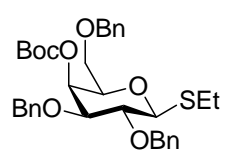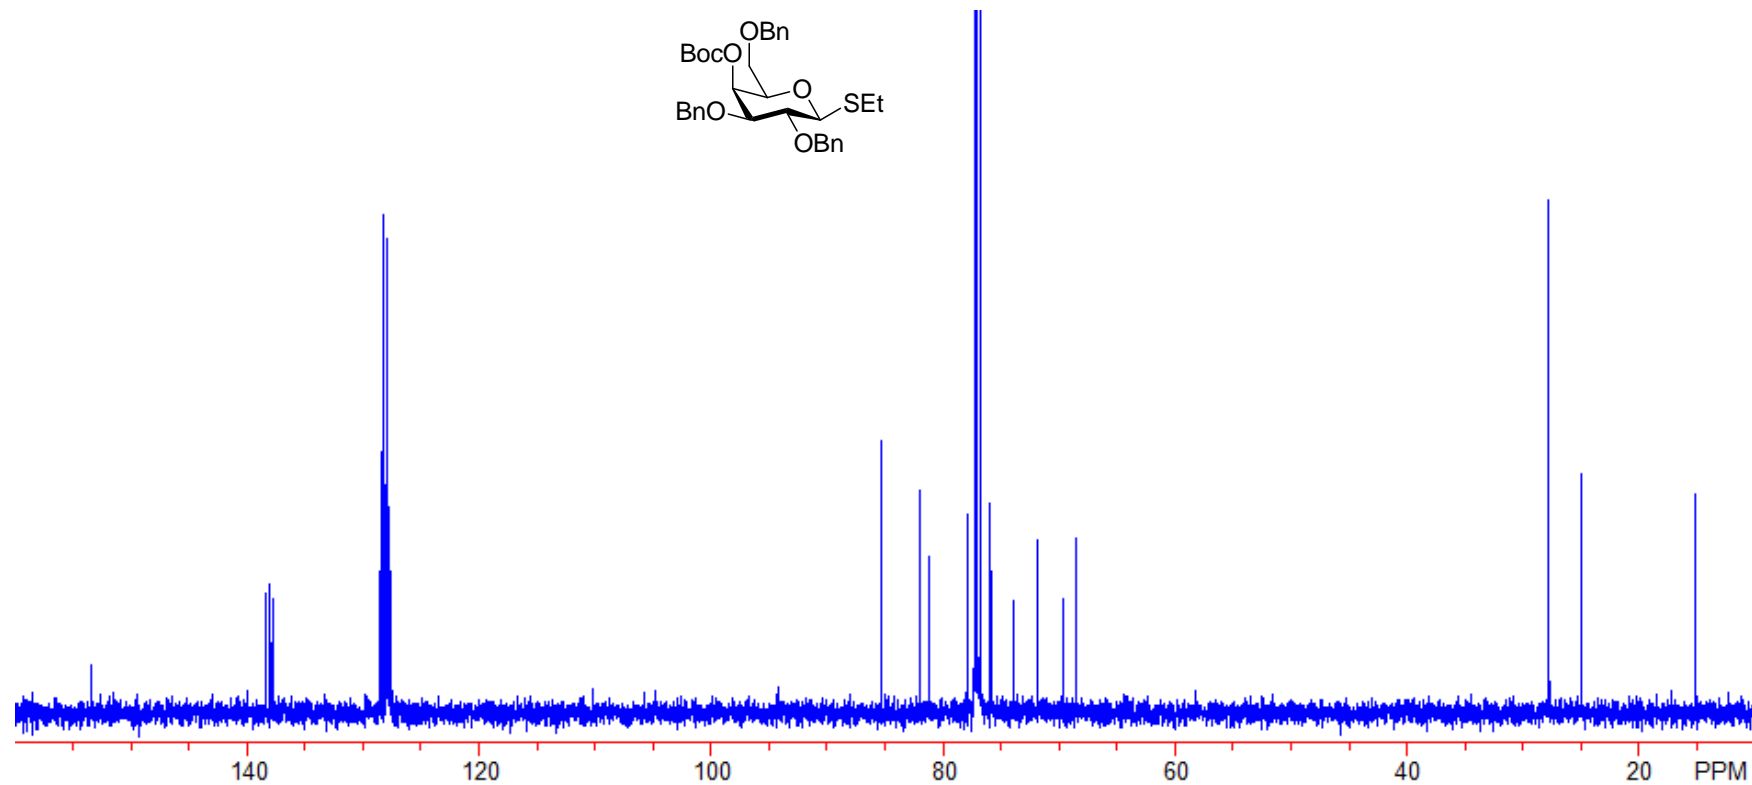

4-*O*-*tert*-Butoxycarbonyl-2,3,6-*O*-tribenzyl- $\alpha$ -D-galactopyranosyl acetate (**25 $\alpha$** ).

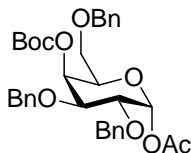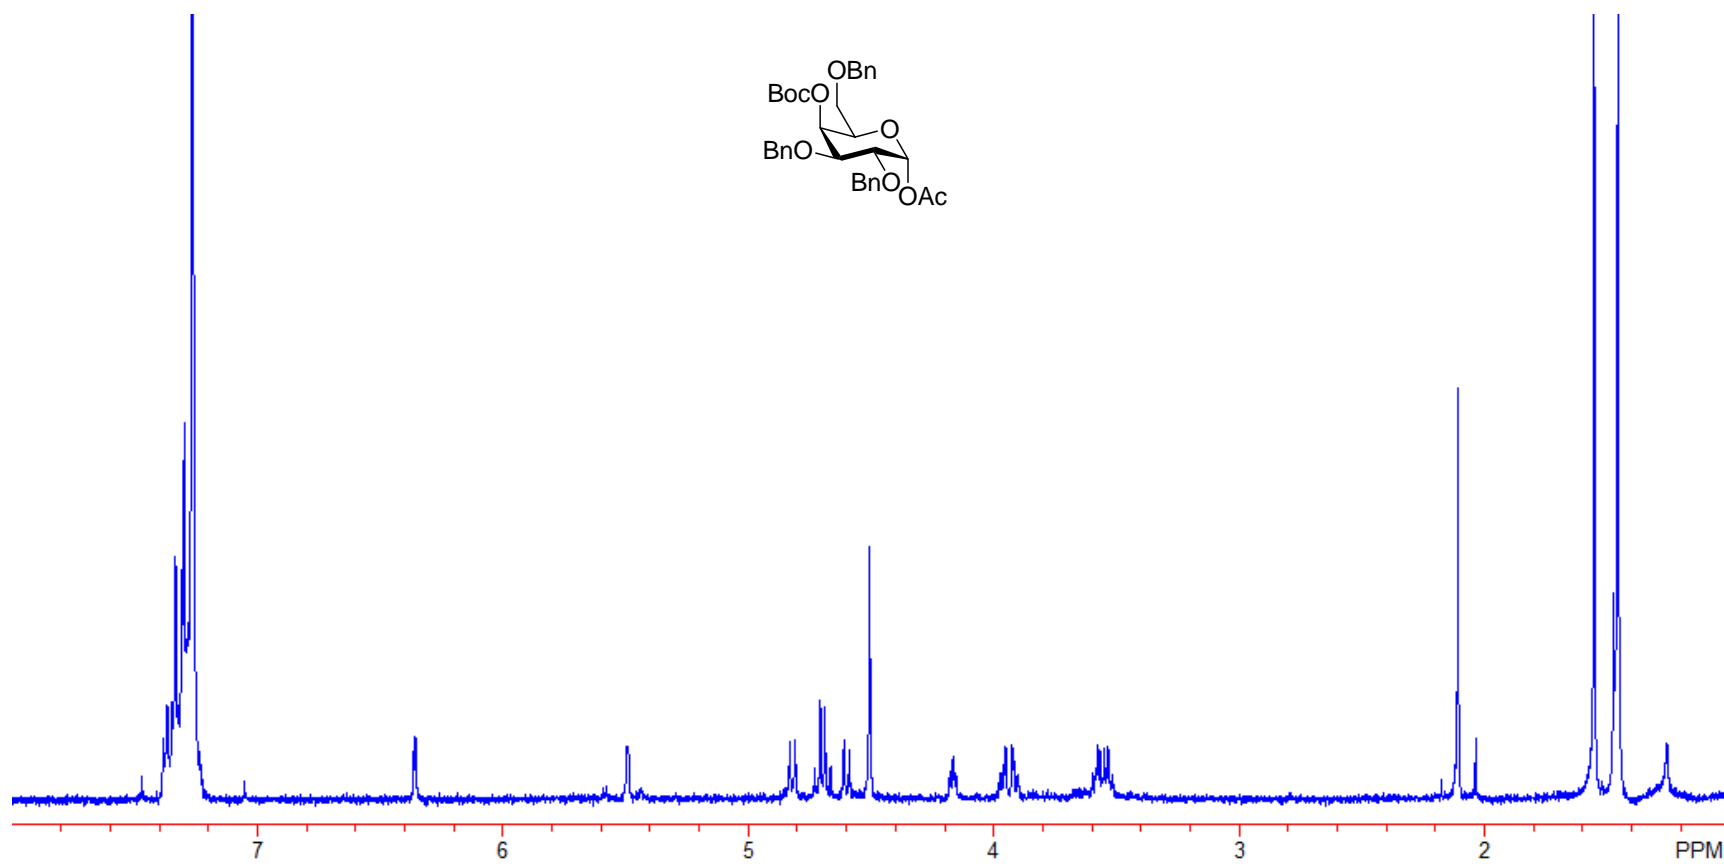



4-*O*-*tert*-Butoxycarbonyl-2,3,6-*O*-tribenzyl- $\alpha$ -D-galactopyranosyl acetate (**25 $\alpha$** ).

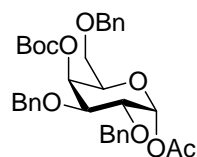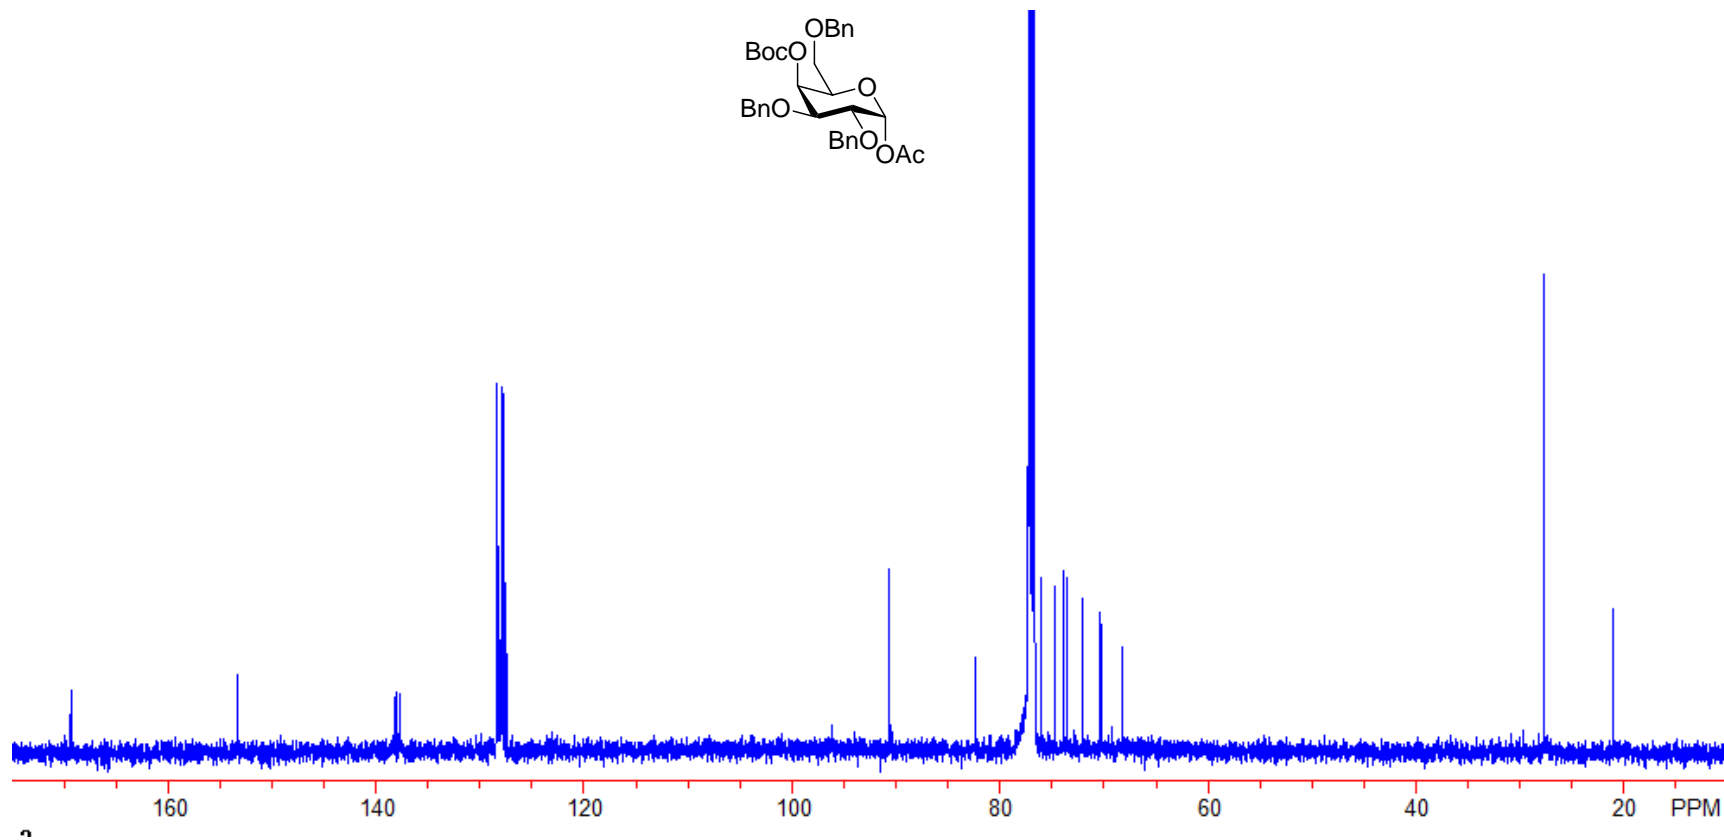

4-*O*-*tert*-butoxycarbonyl-2,3,6-*O*-benzyl- $\beta$ -D-galactopyranosyl acetate (**25 $\beta$** ).

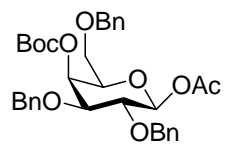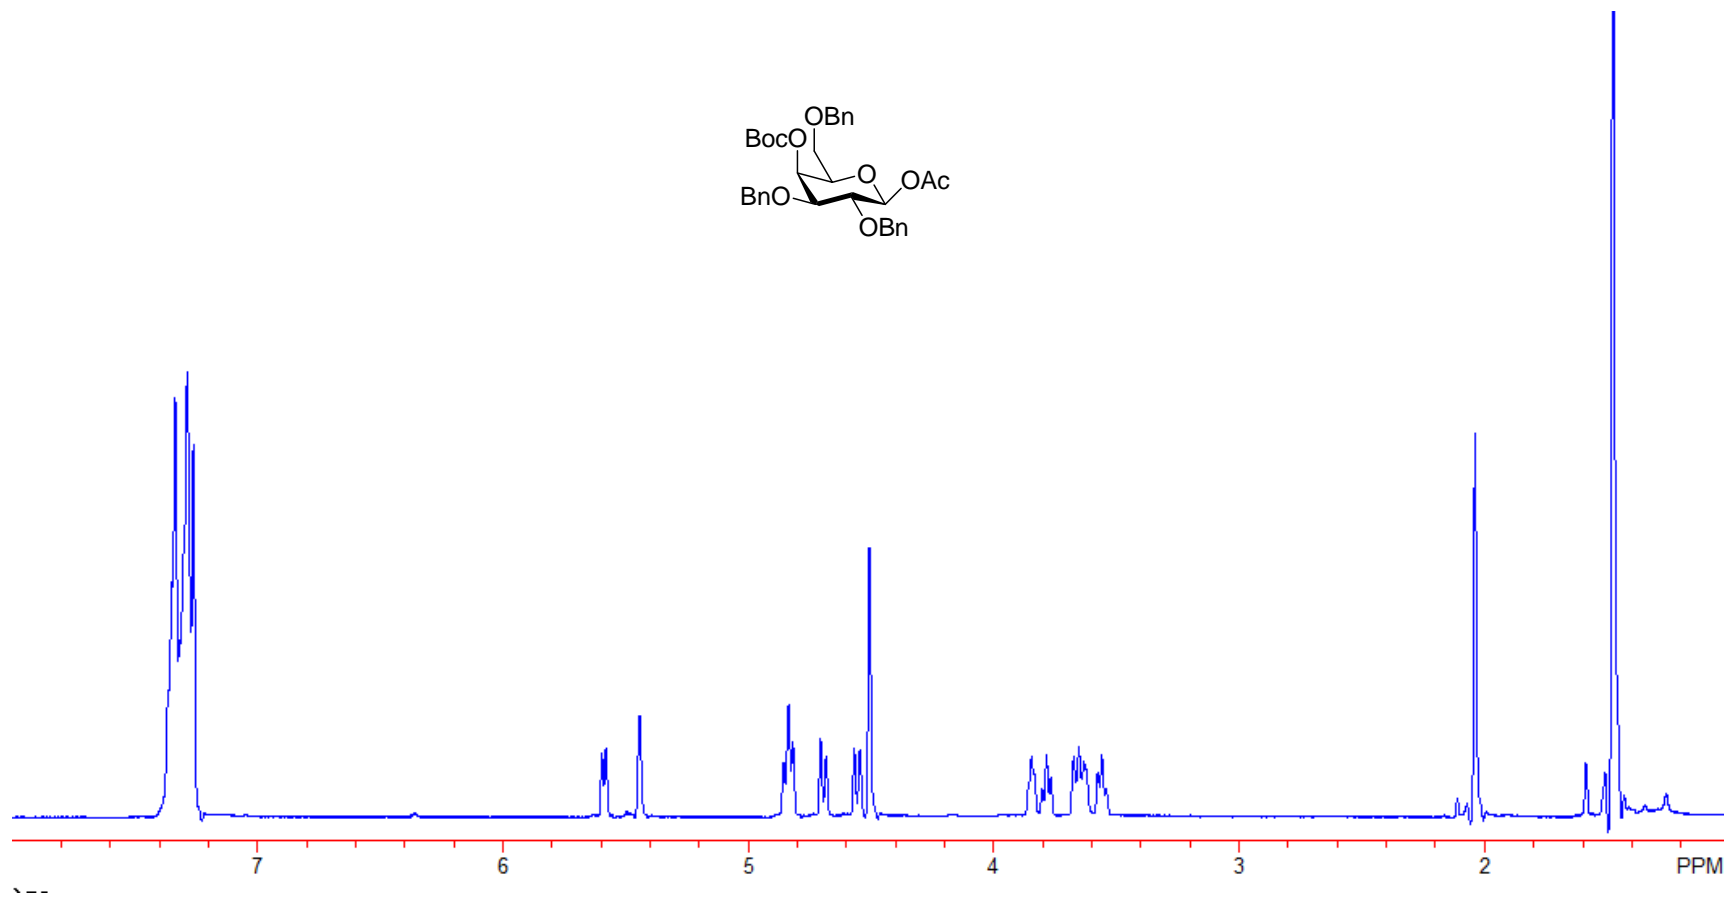

4-*O*-*tert*-butoxycarbonyl-2,3,6-*O*-benzyl- $\beta$ -D-galactopyranosyl acetate (**25 $\beta$** ).

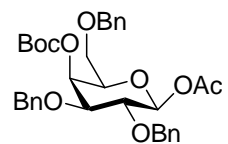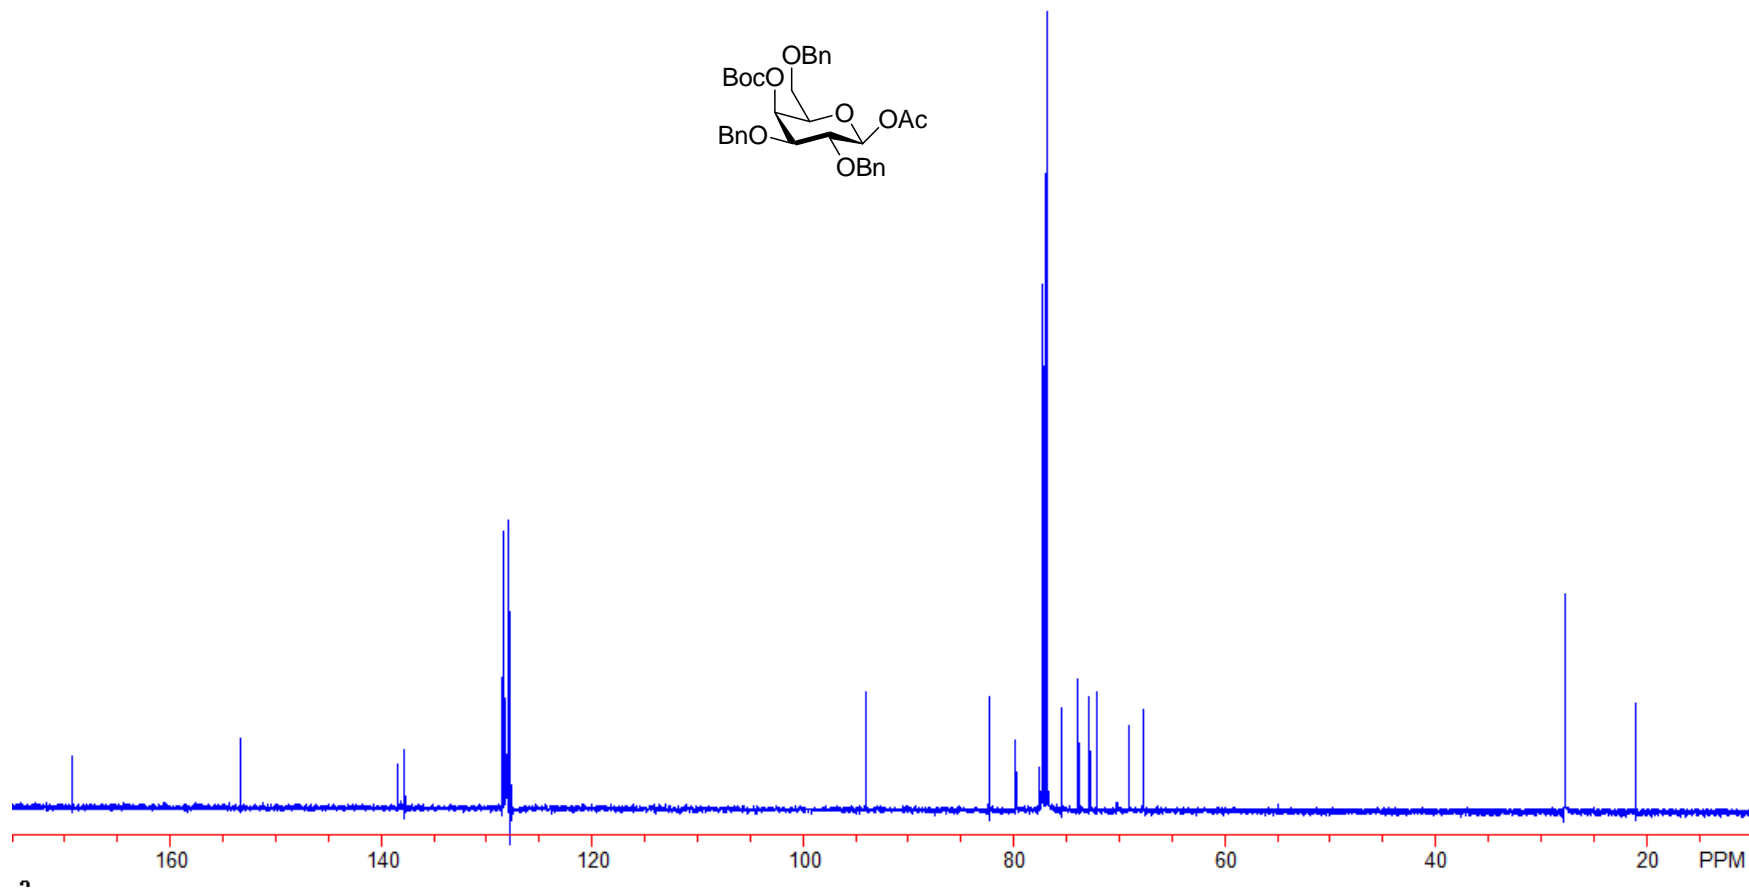

Cyclohexyl 4-*O*-*tert*-butoxycarbonyl-2,3,6-*O*-benzyl-D-galactopyranoside (**26a**).

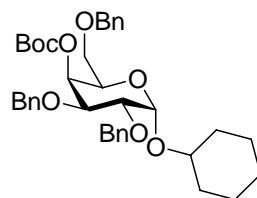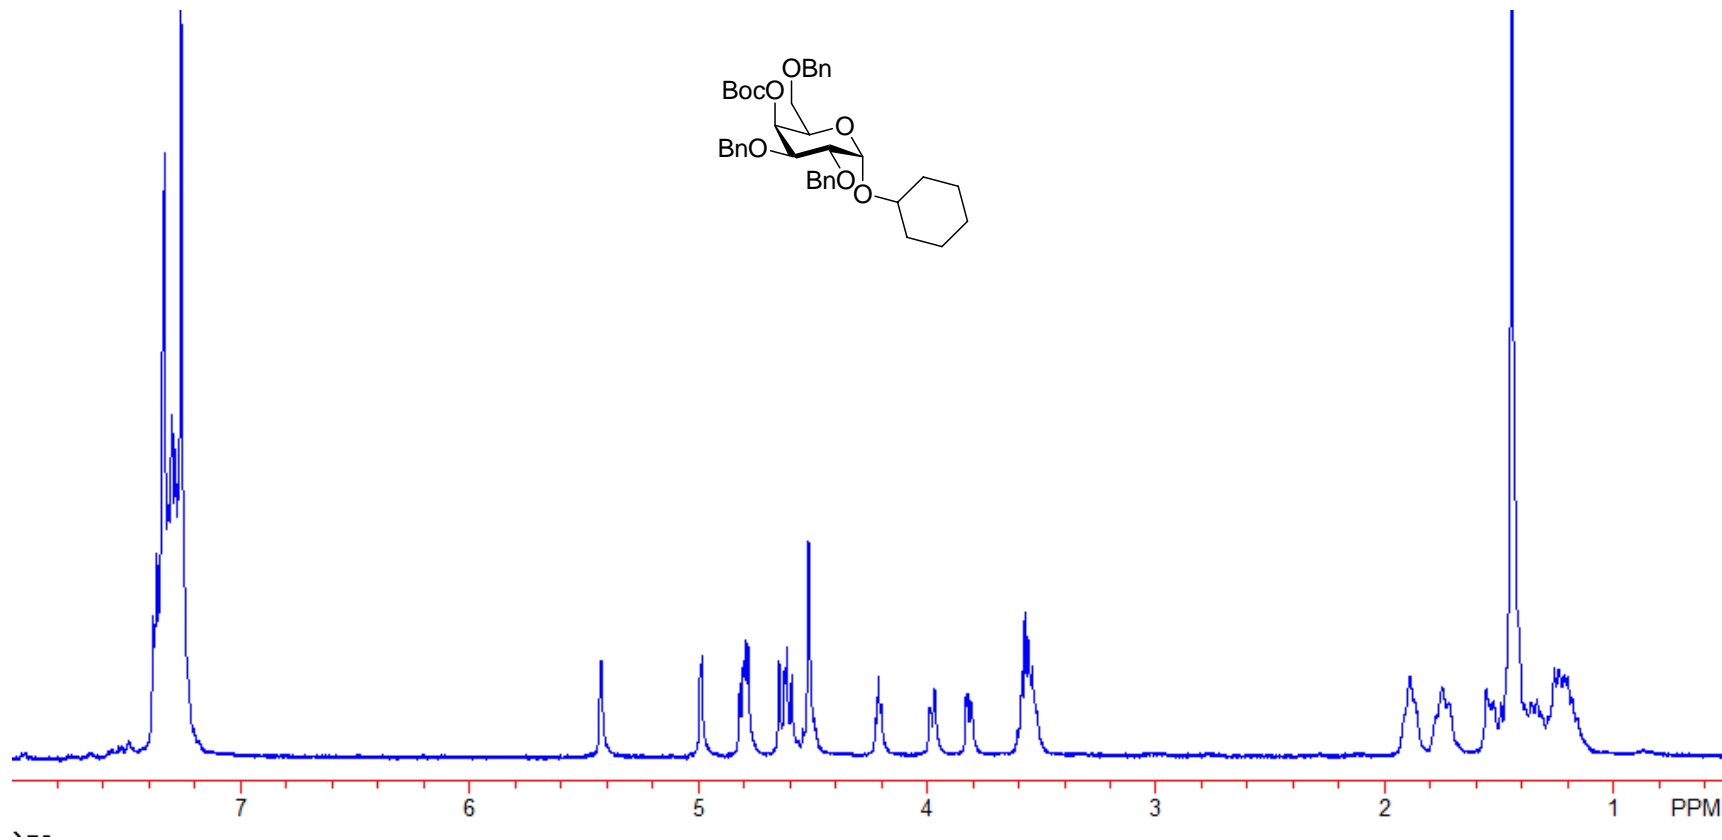

Cyclohexyl 4-*O*-*tert*-butoxycarbonyl-2,3,6-*O*-benzyl-D-galactopyranoside (**26a**).

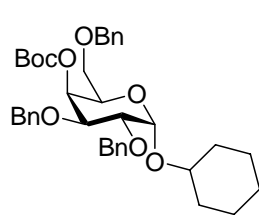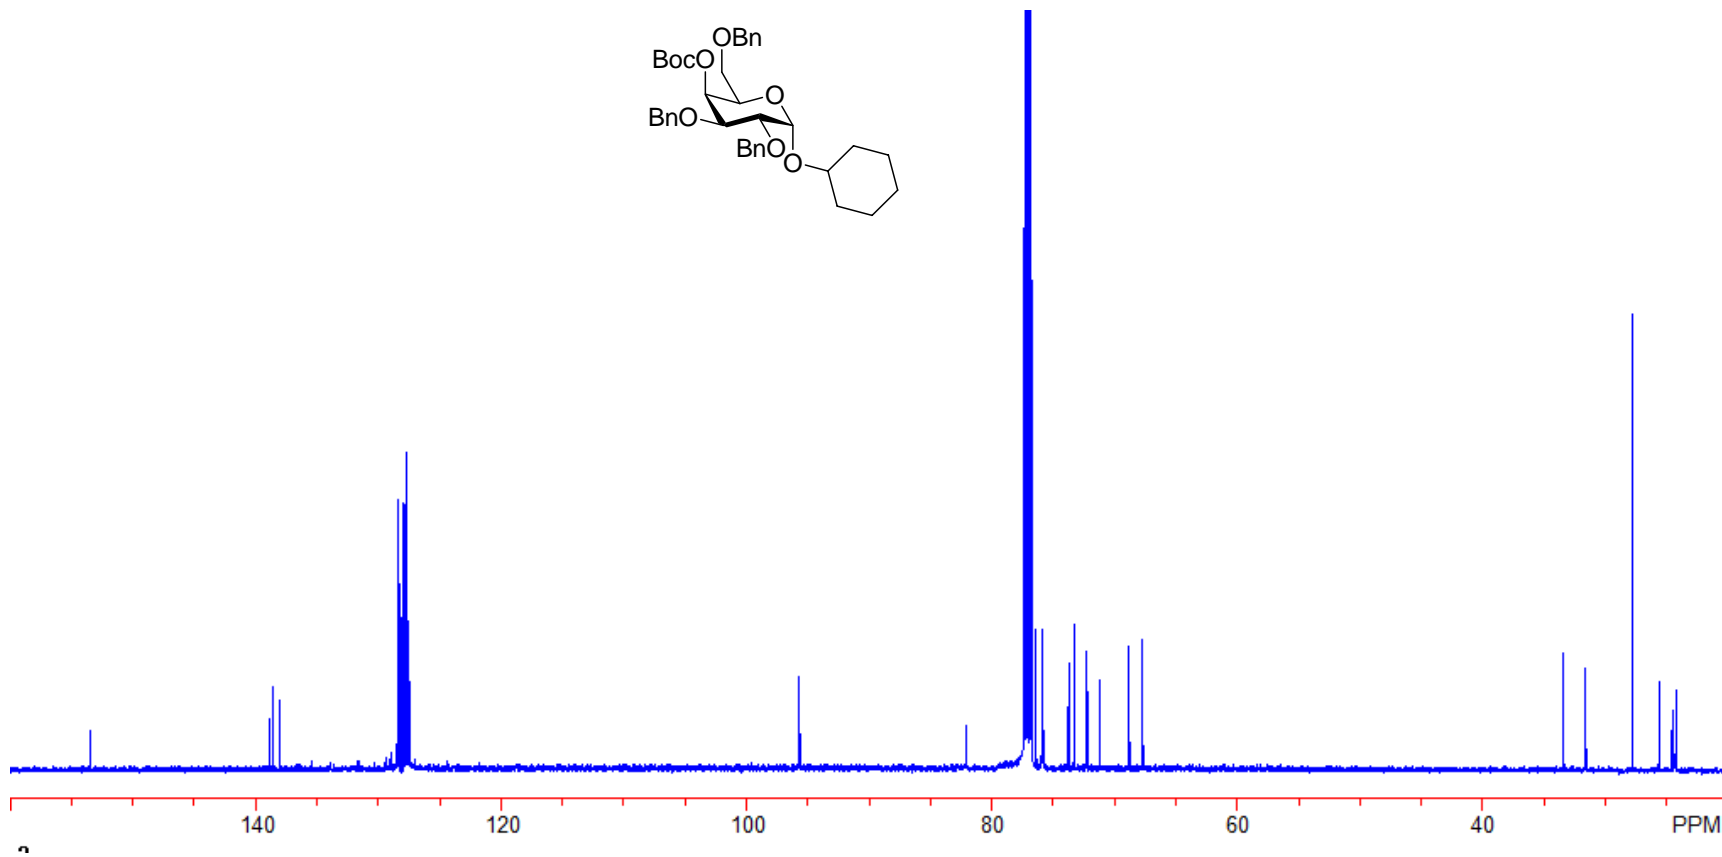

Cyclohexyl 4-*O*-*tert*-butoxycarbonyl-2,3,6-*O*-benzyl- $\beta$ -D-galactopyranoside (**26 $\beta$** ).

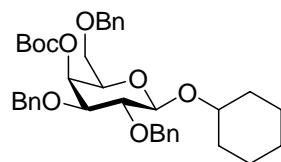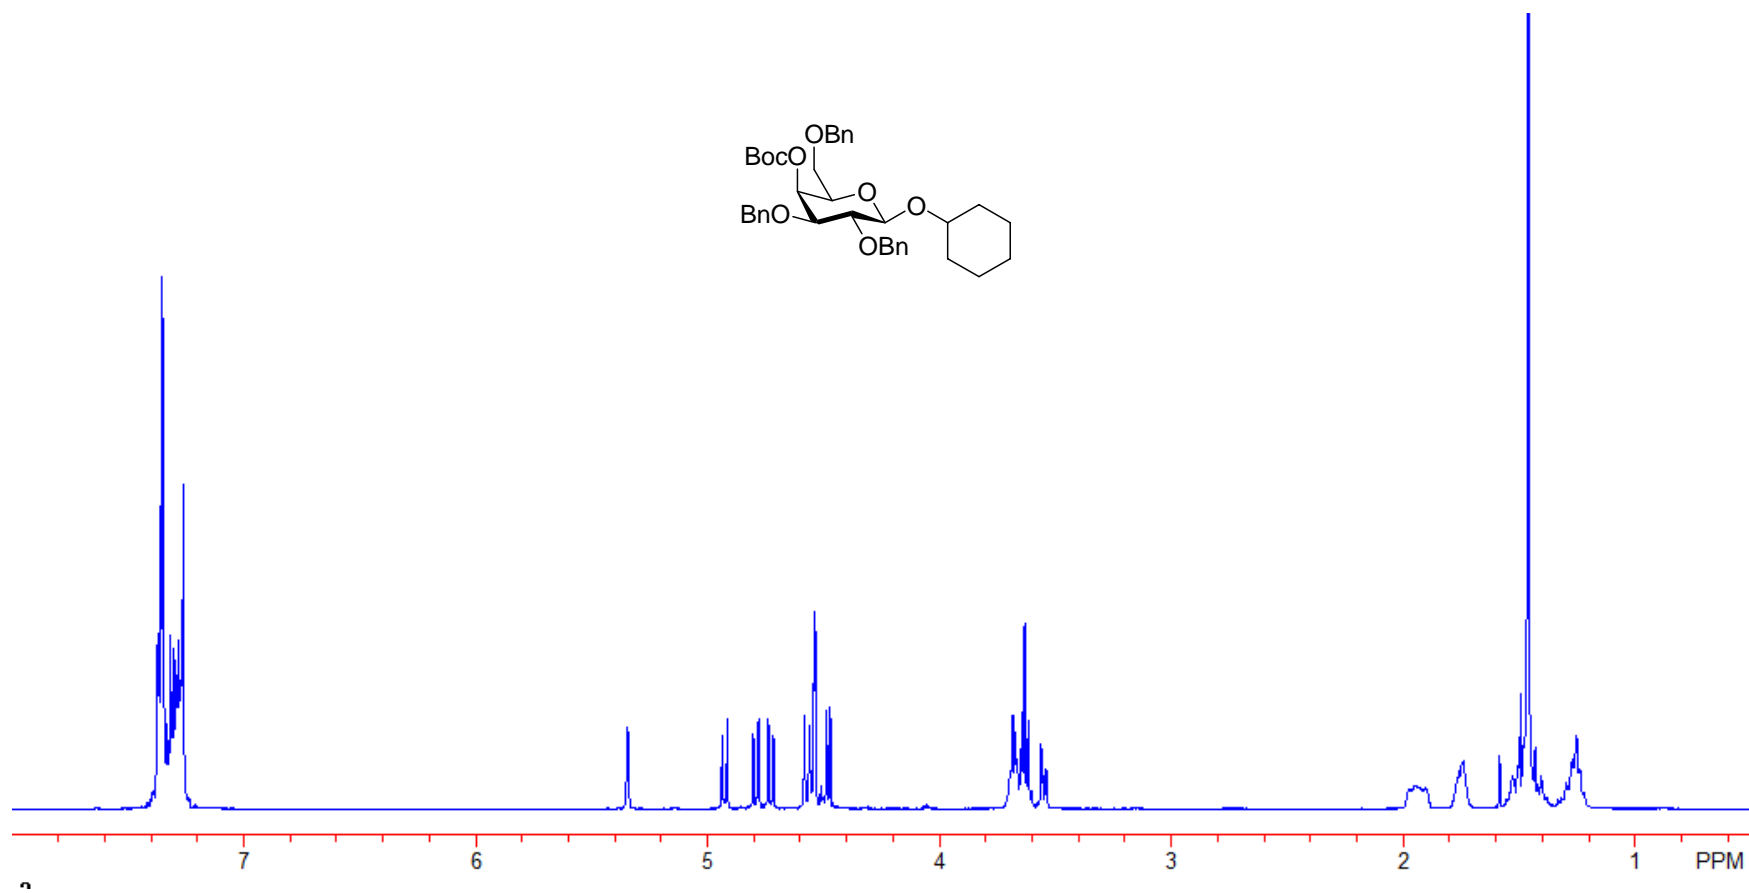

Cyclohexyl 4-*O*-*tert*-butoxycarbonyl-2,3,6-*O*-benzyl- $\beta$ -D-galactopyranoside (**26 $\beta$** ).

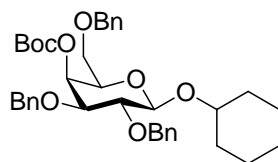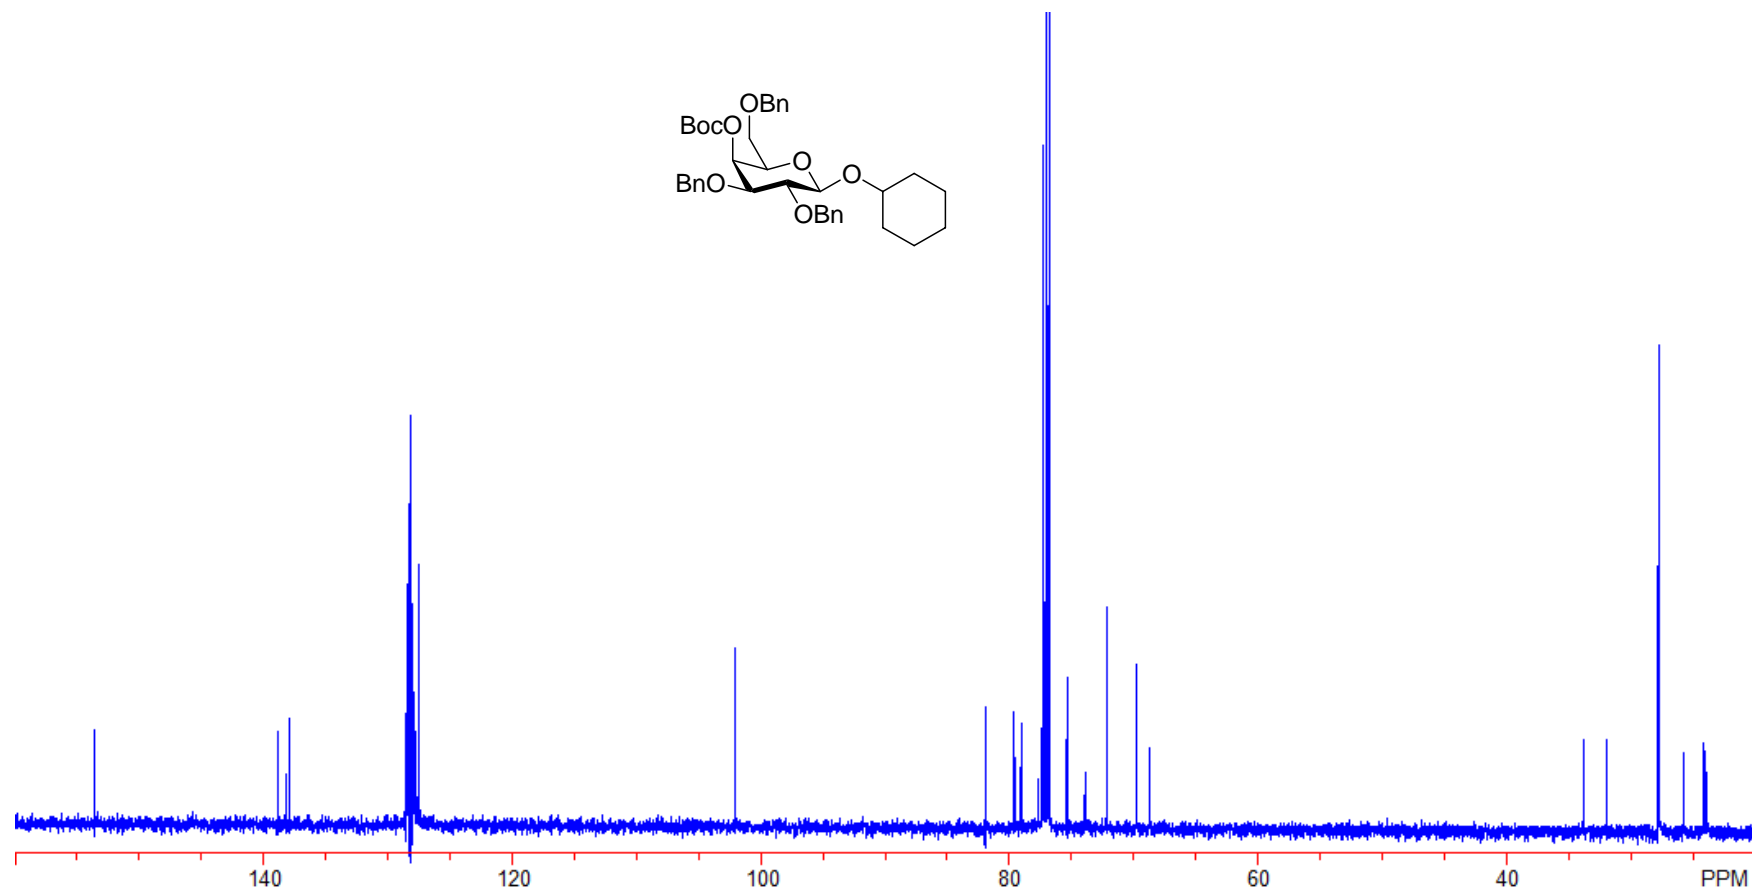

Phenyl 2,3,6-tri-*O*-benzyl-4-*O*-*tert*-butyloxycarbonyl-1-thio- $\alpha$ -D-mannopyranoside (**27**)

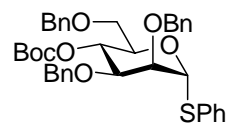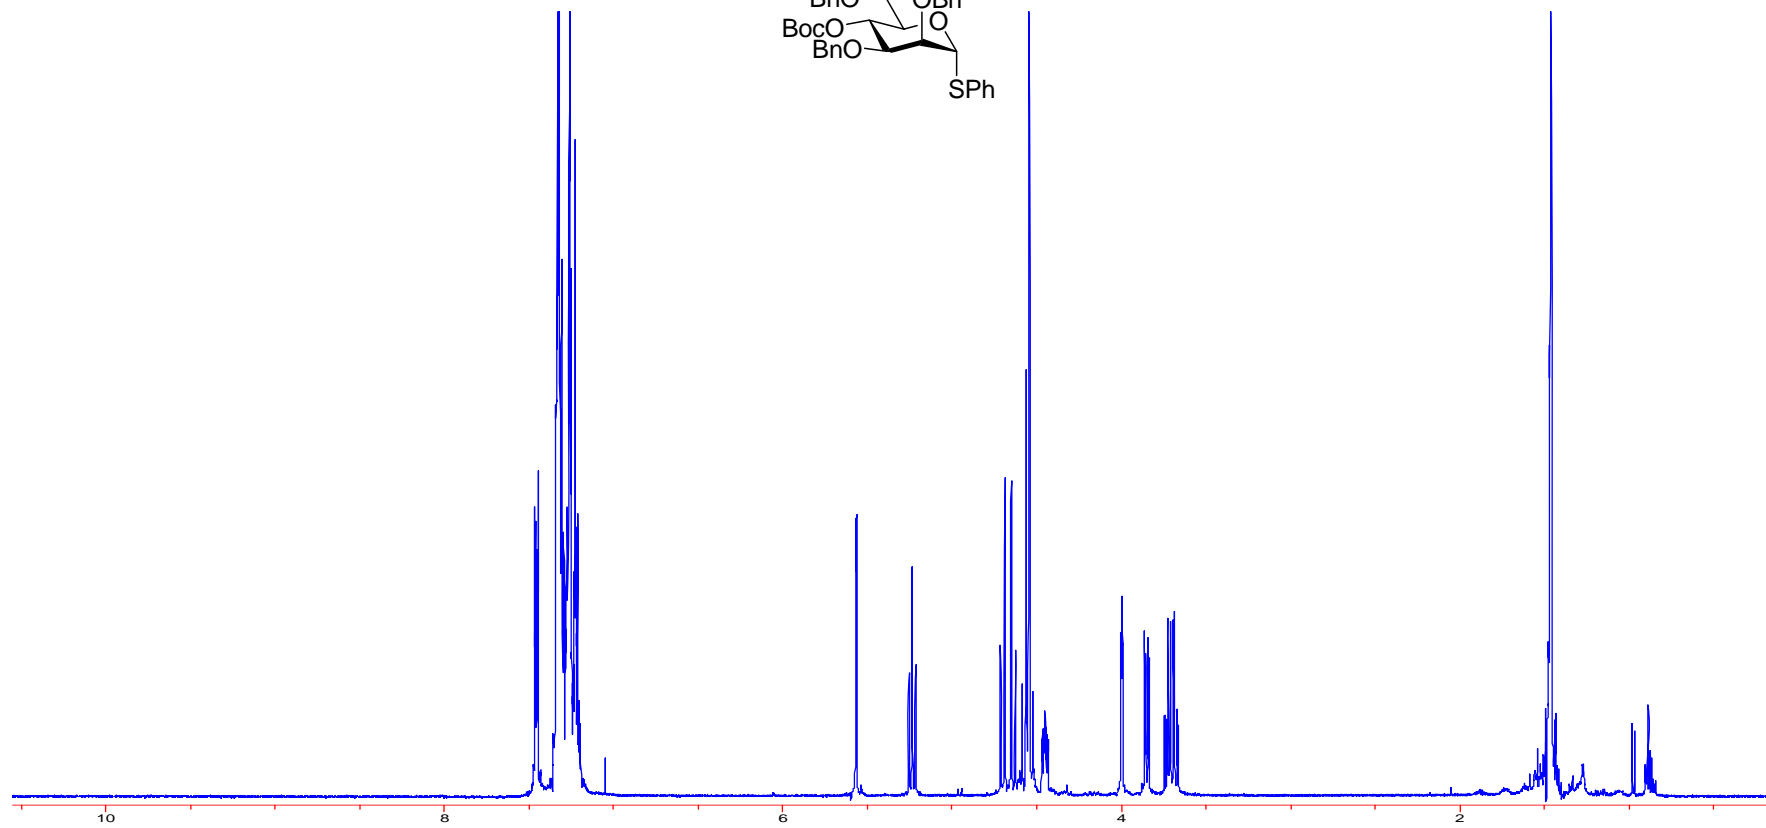



Phenyl 2,3,6-tri-*O*-benzyl-4-*O*-*tert*-butyloxycarbonyl-1-thio- $\alpha$ -D-mannopyranoside (**27**)

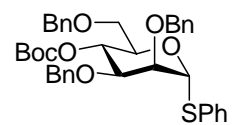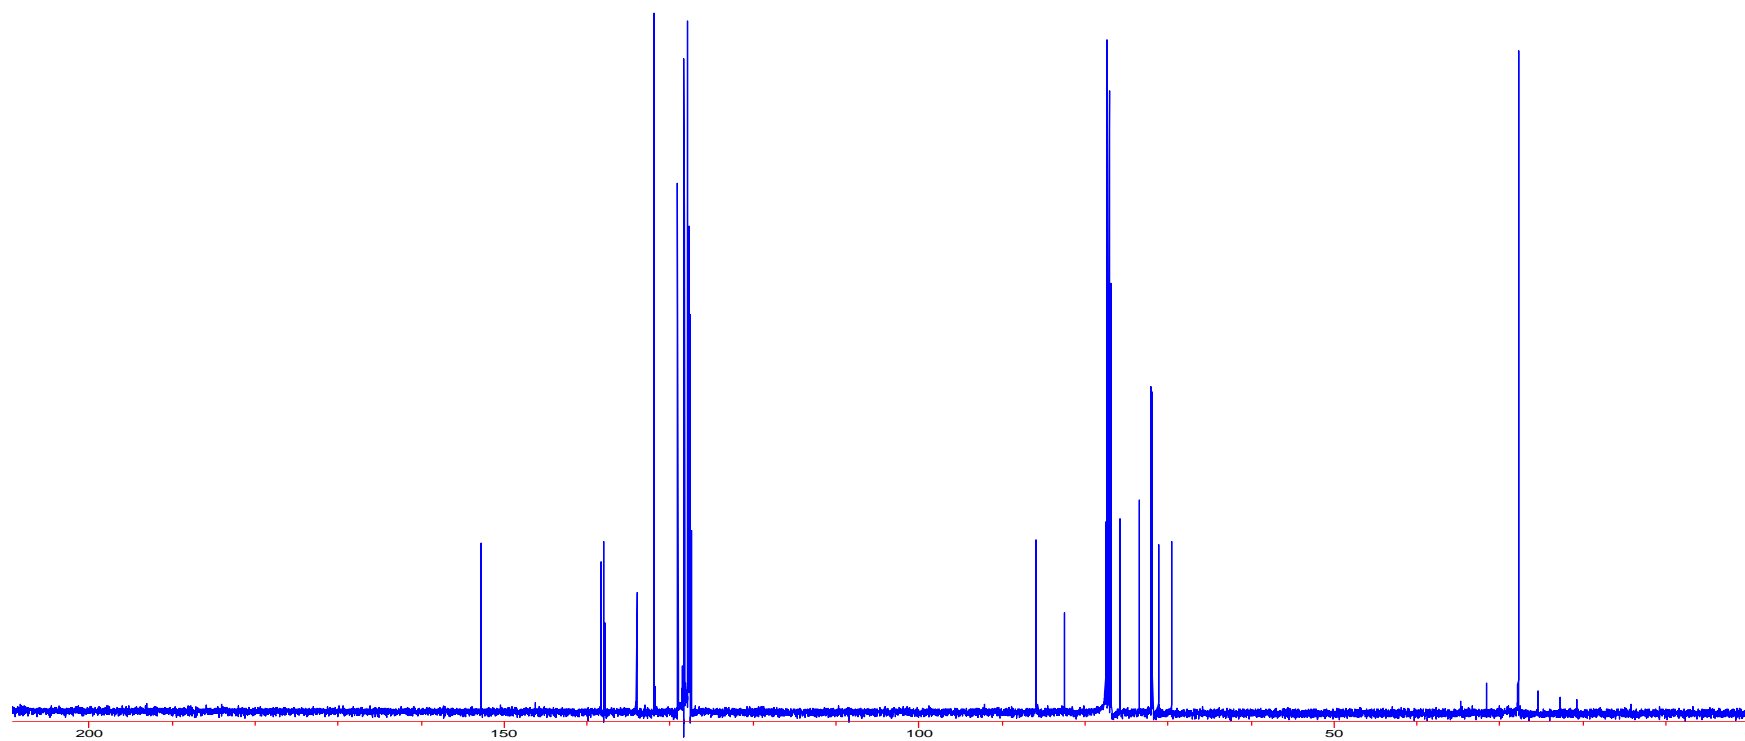

Isopropyl 2,3,6-tri-*O*-benzyl-4-*O*-*tert*-butyloxycarbonyl- $\alpha$ -D-mannopyranoside (**28a**)

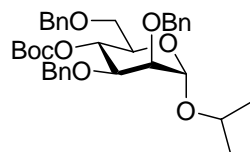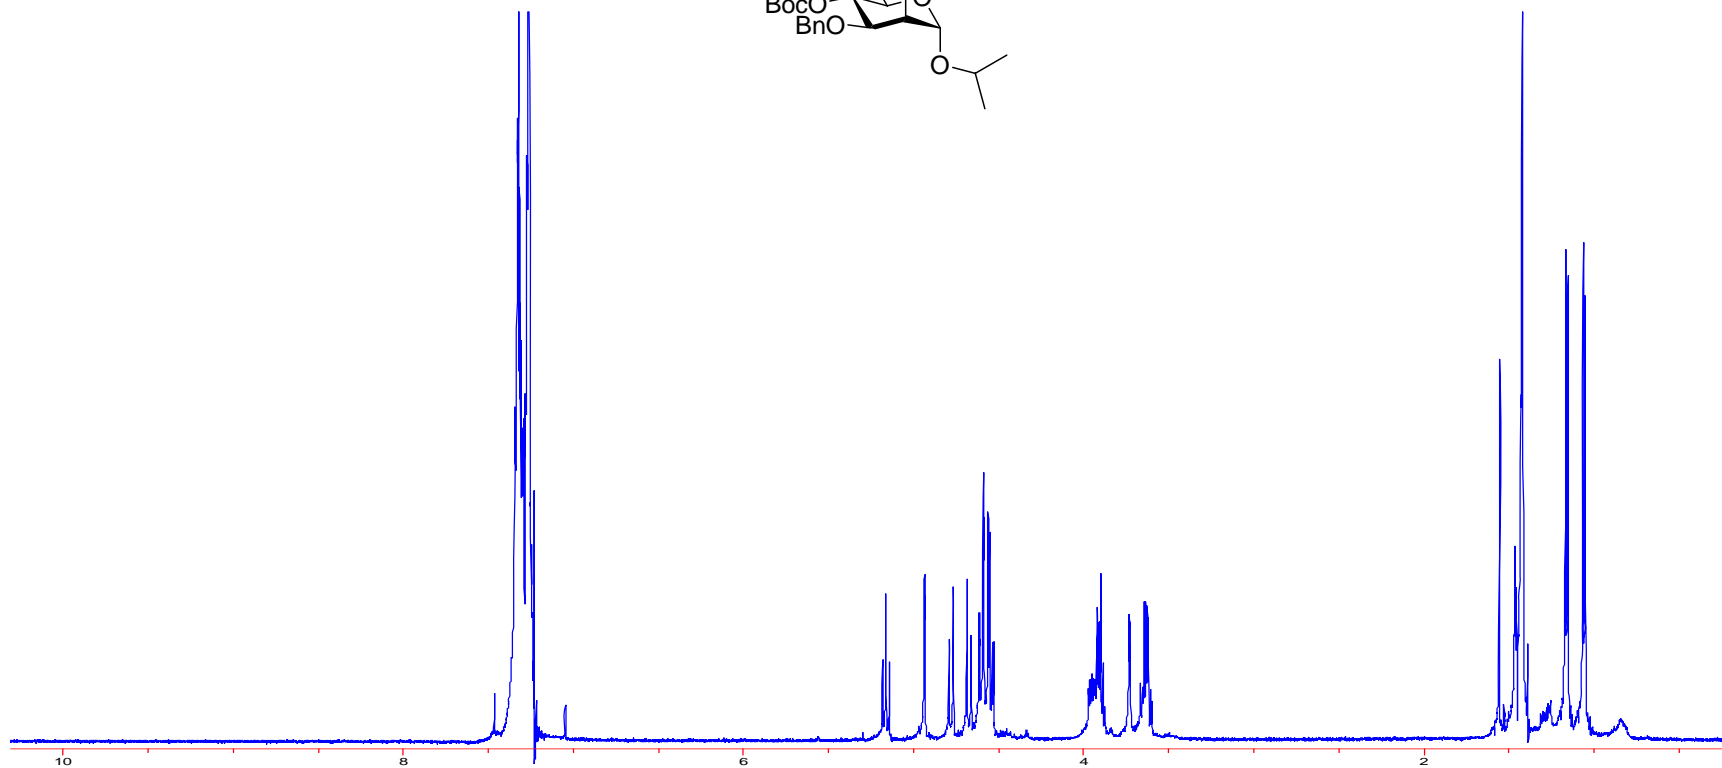

Isopropyl 2,3,6-tri-*O*-benzyl-4-*O*-*tert*-butyloxycarbonyl- $\alpha$ -D-mannopyranoside (**28a**)

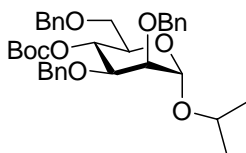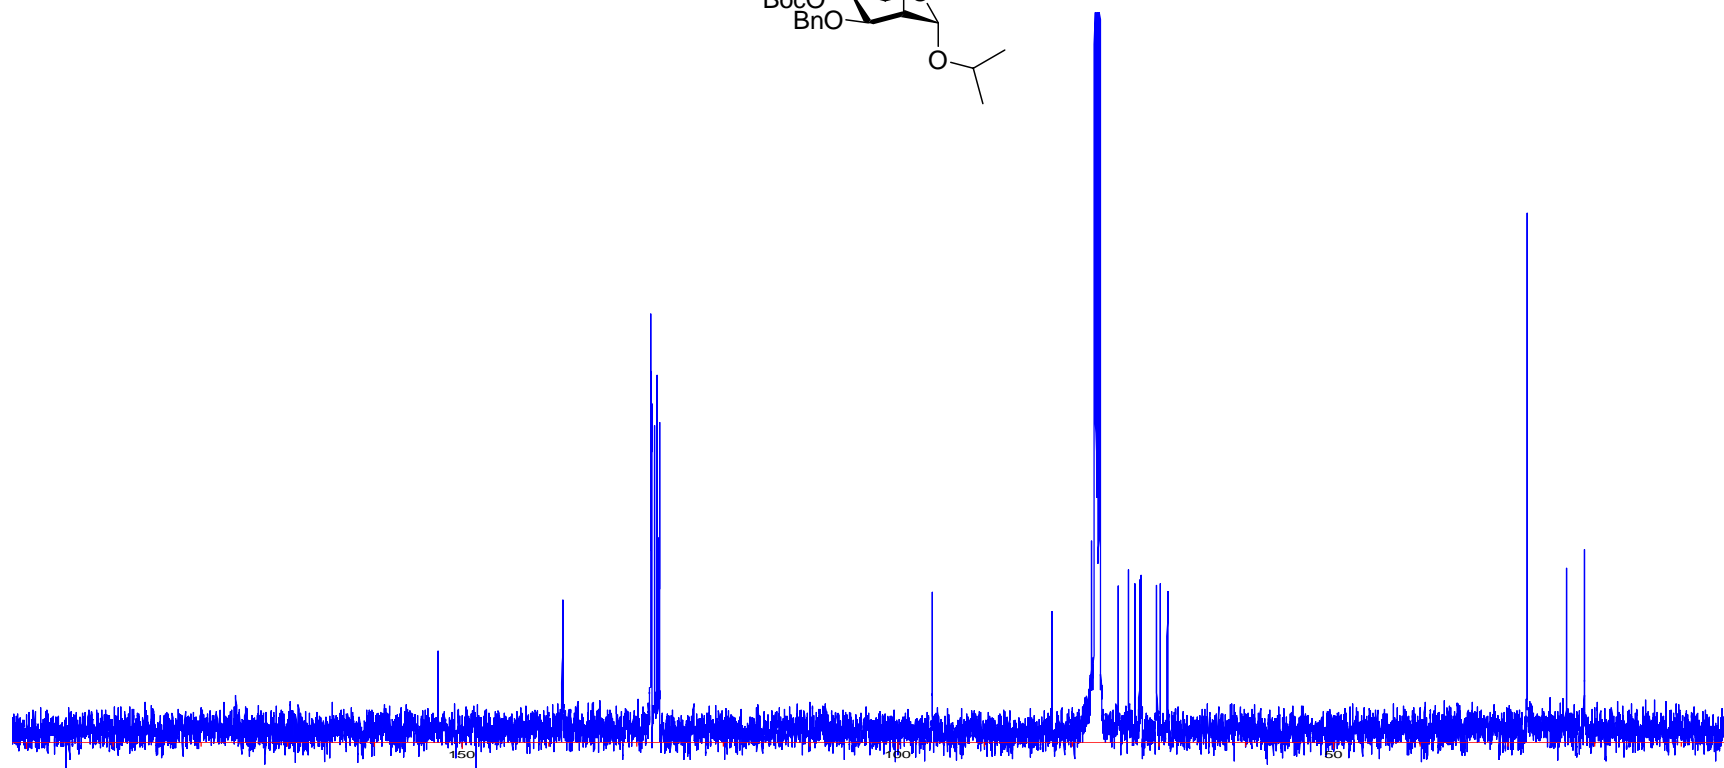

Isopropyl 2,3,6-tri-*O*-benzyl-4-*O*-*tert*-butyloxycarbonyl- $\beta$ -D-mannopyranoside (**28 $\beta$** )

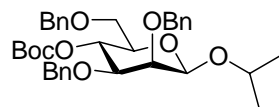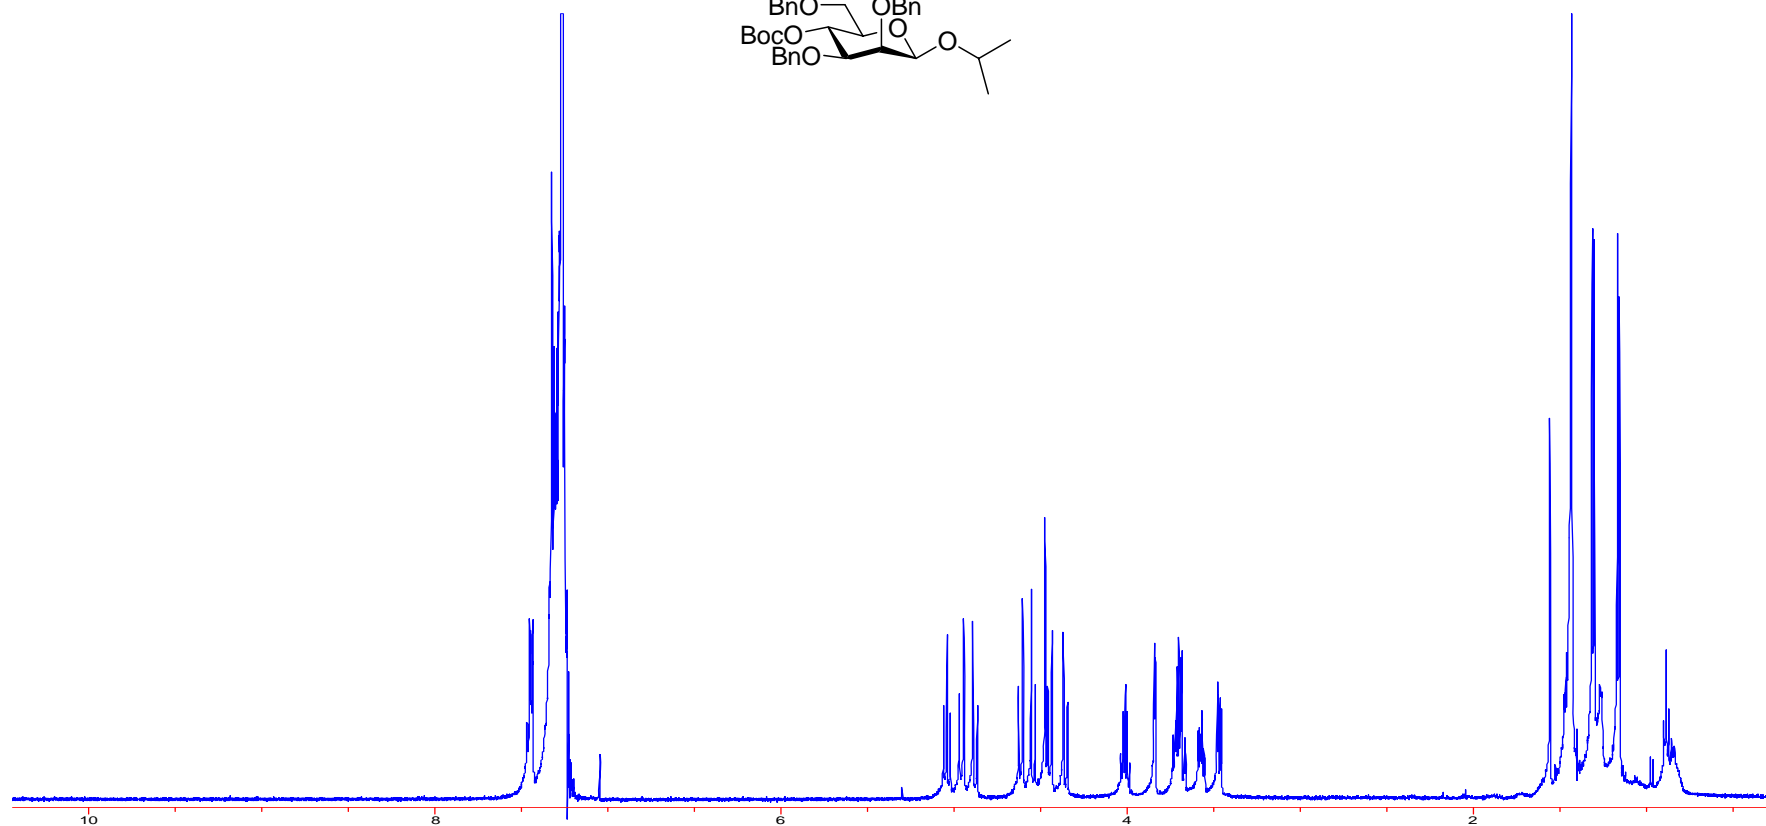

Isopropyl 2,3,6-tri-*O*-benzyl-4-*O*-*tert*-butyloxycarbonyl- $\beta$ -D-mannopyranoside (**28 $\beta$** )

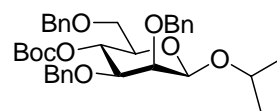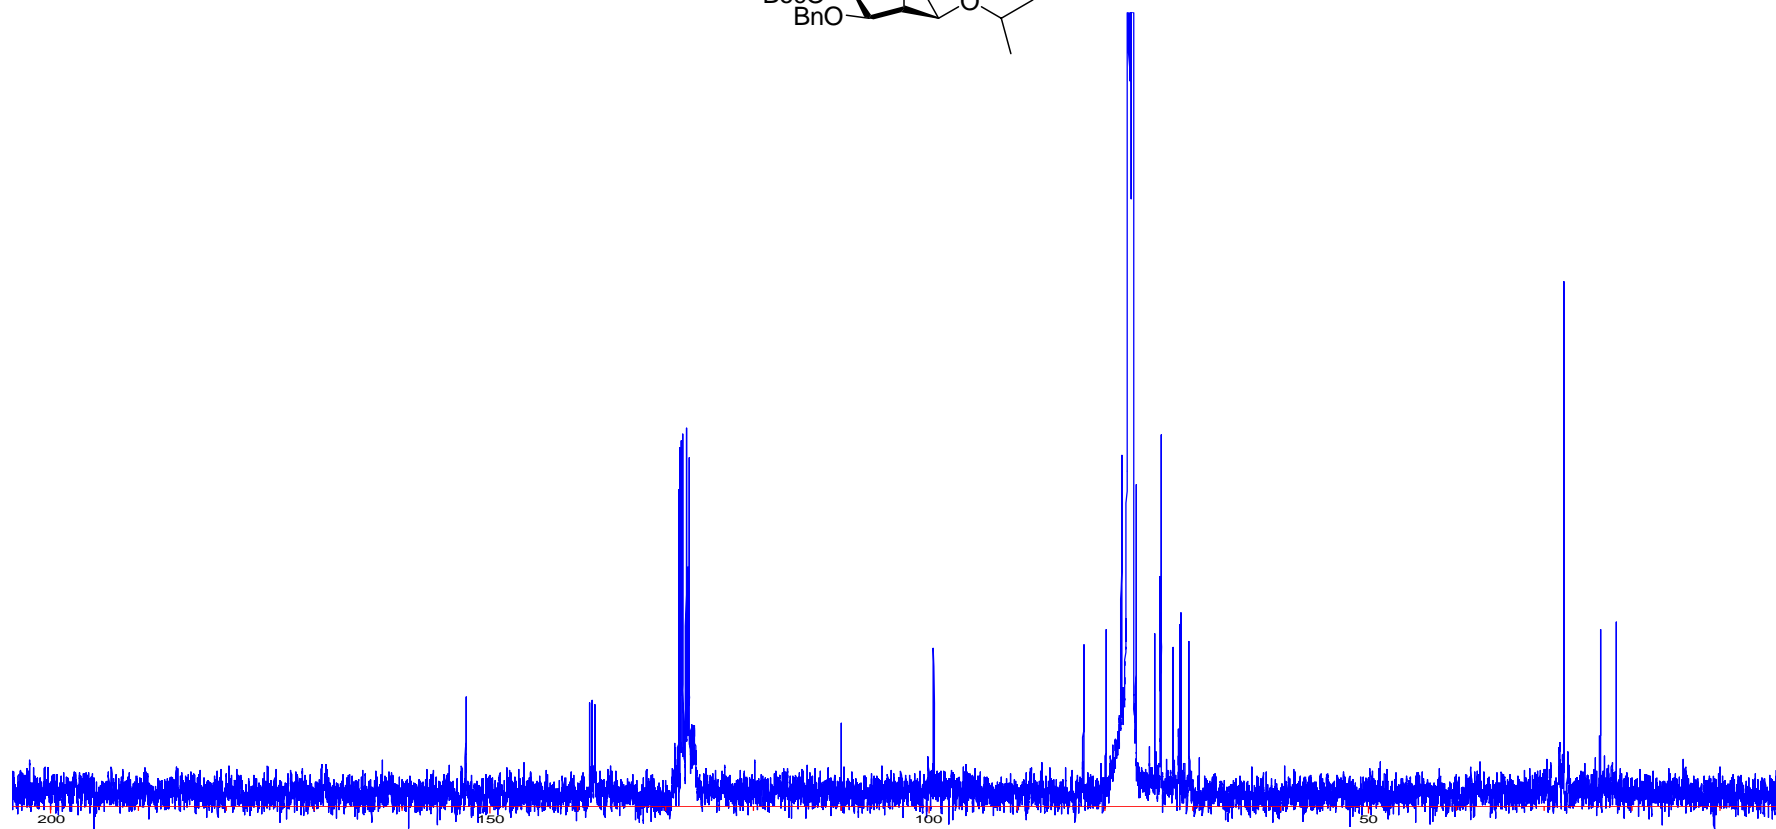

*N*-(2',3',6'-tri-*O*-benzyl-4'-*O*-*tert*-butyloxycarbonyl- $\alpha$ -D-mannopyranosyl)-succinimide (**29**).

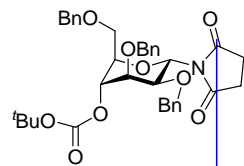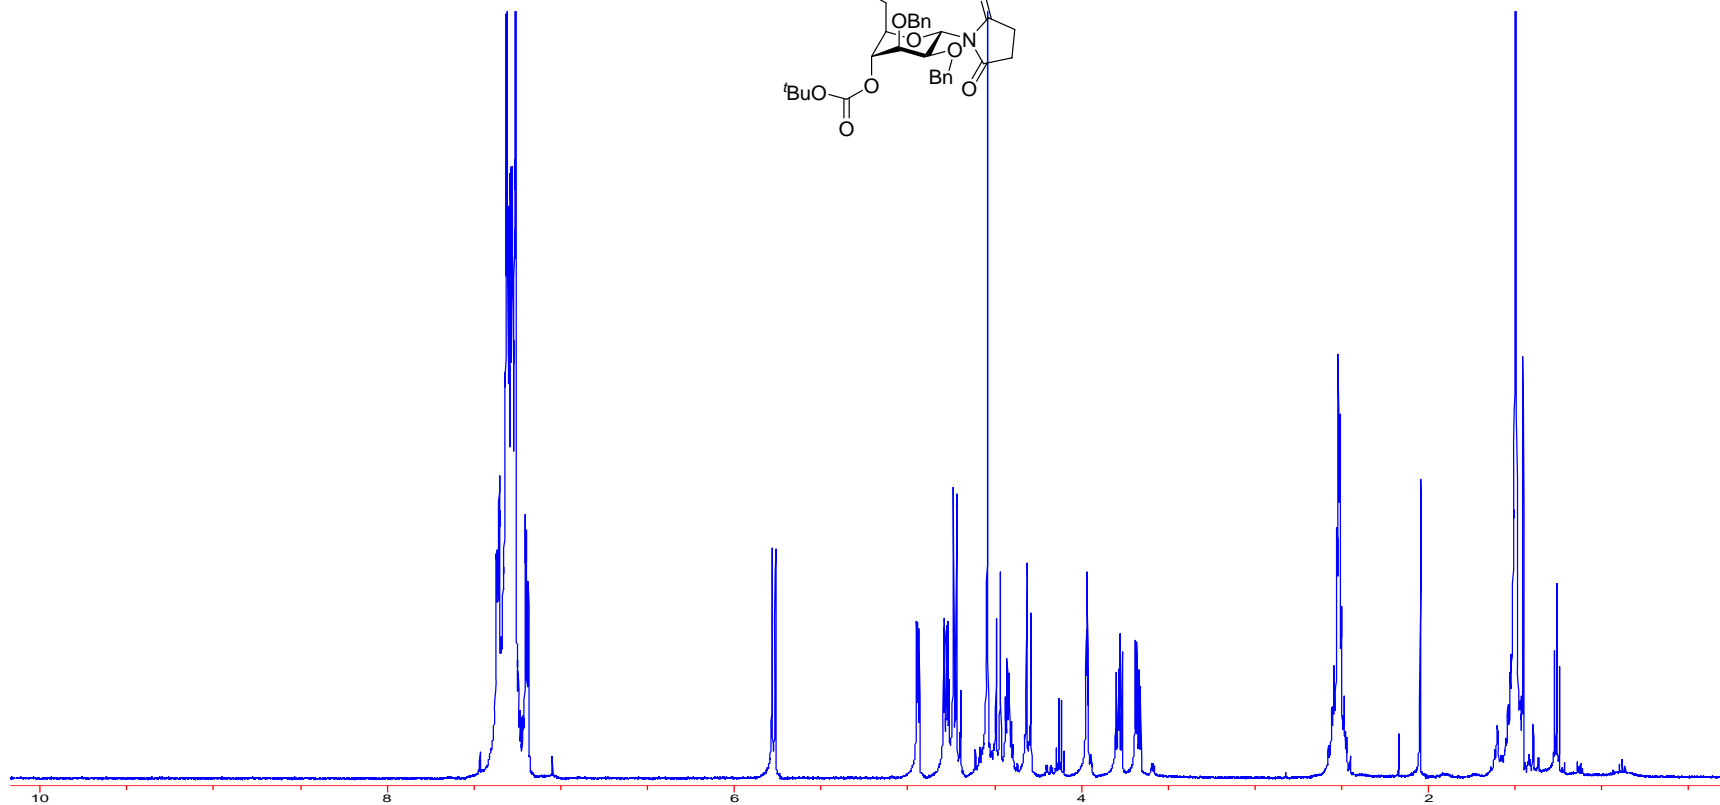

*N*-(2',3',6'-tri-*O*-benzyl-4'-*O*-*tert*-butyloxycarbonyl- $\alpha$ -D-mannopyranosyl)-succinimide (**29**).

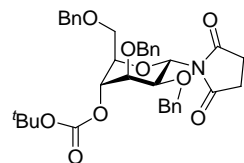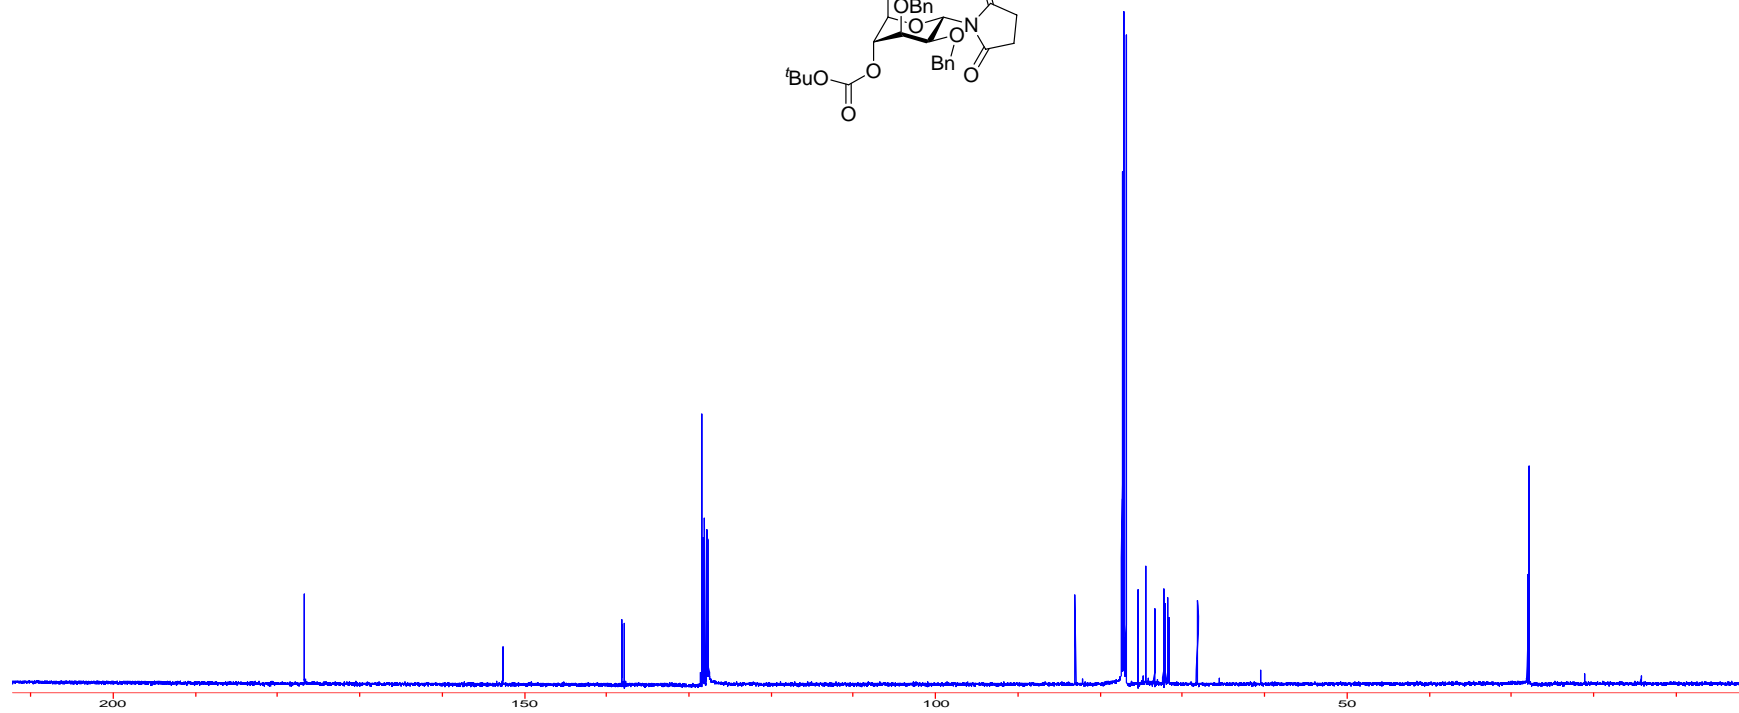

*p*-Tolyl 4-*O*-*tert*-butoxycarbonyl-3-azido-2,3,6-trideoxy-1-thio- $\alpha$ -L-lyxo-hexopyranoside (**30**).

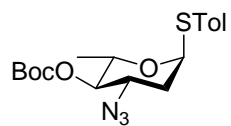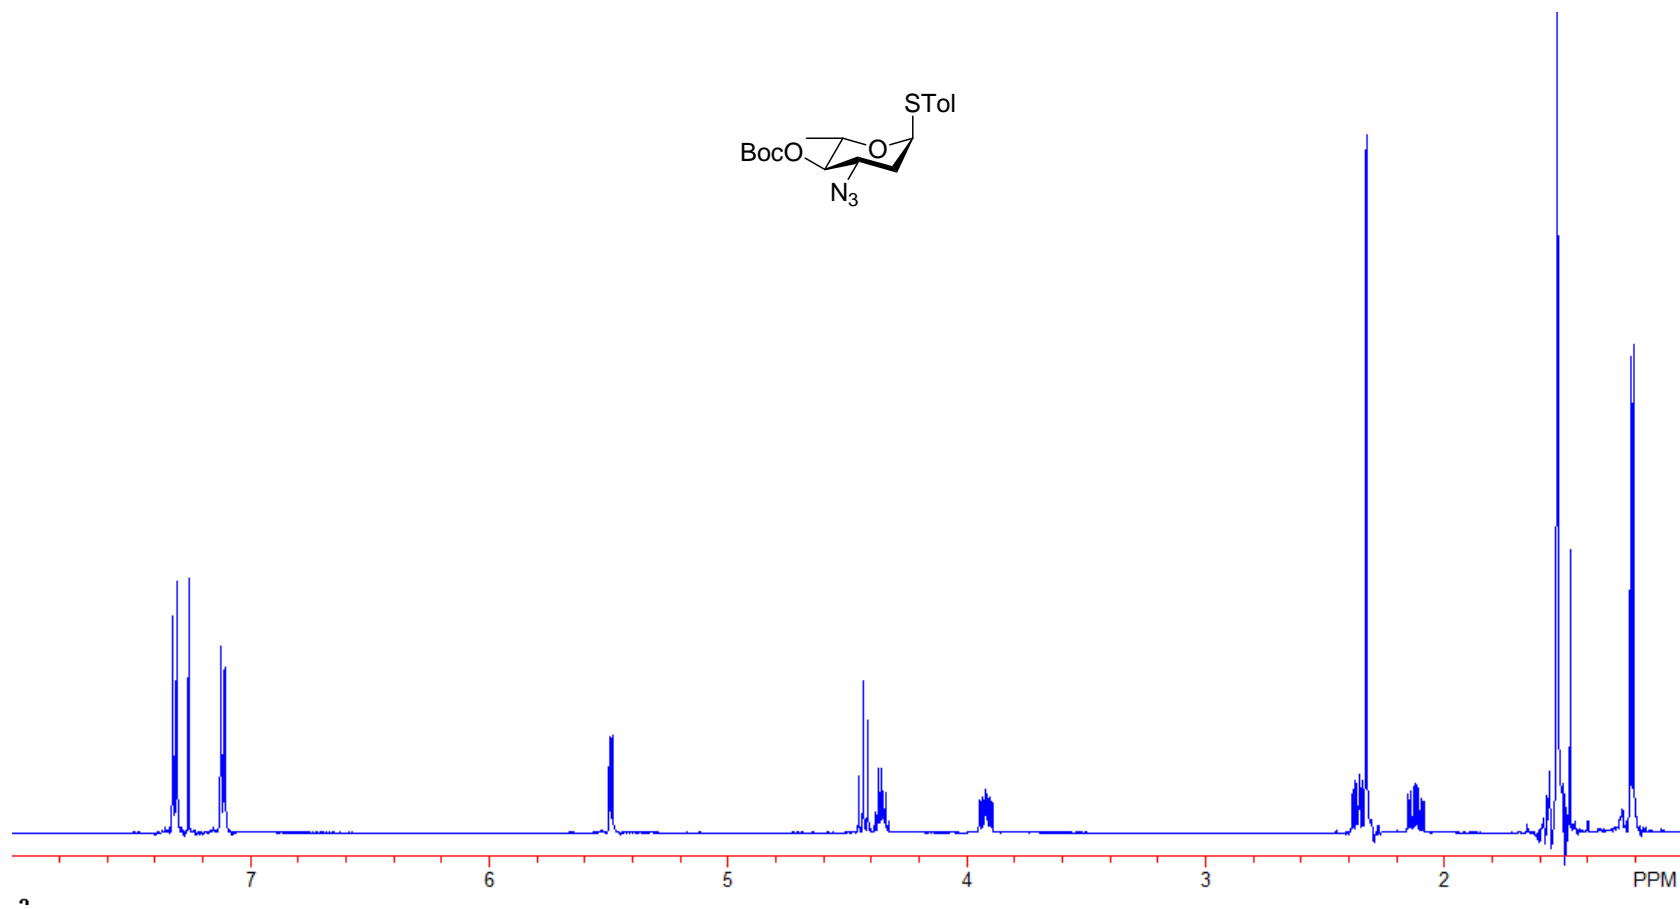



*p*-Tolyl 4-*O*-*tert*-butoxycarbonyl-3-azido-2,3,6-trideoxy-1-thio- $\alpha$ -L-lyxo-hexopyranoside (**30**).

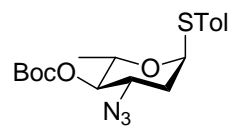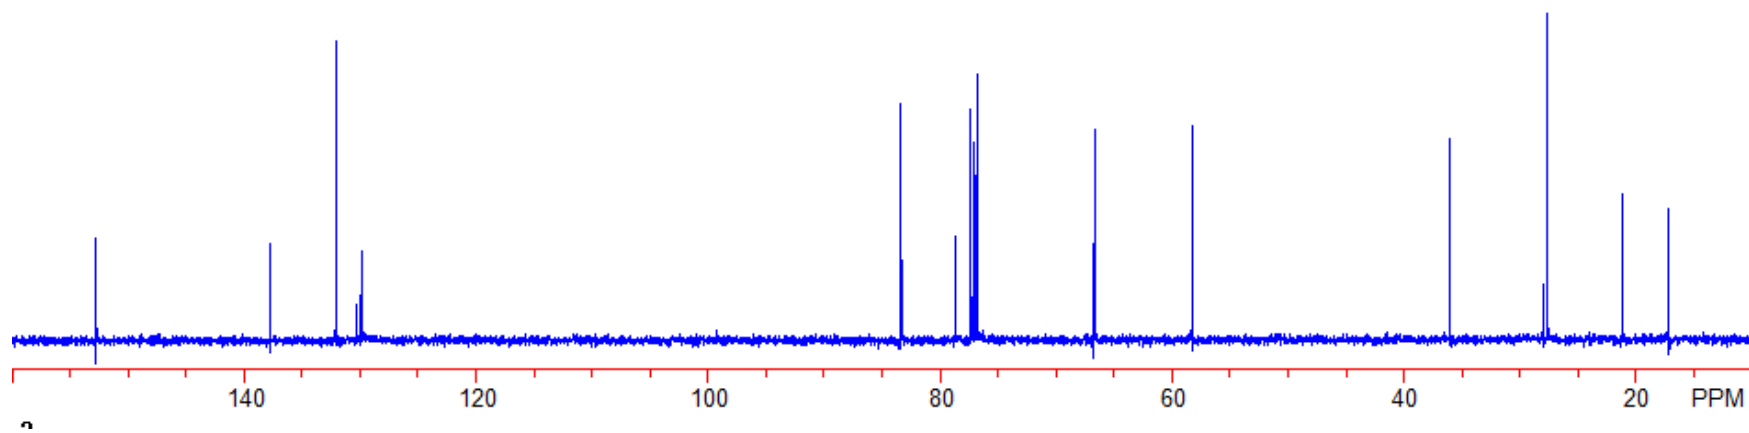

4-*O*-*tert*-butoxycarbonyl-3-azido-2,3,6-trideoxy-1- $\alpha$ -L-*lyxo*-hexopyranoside.

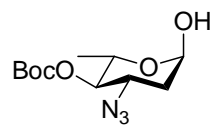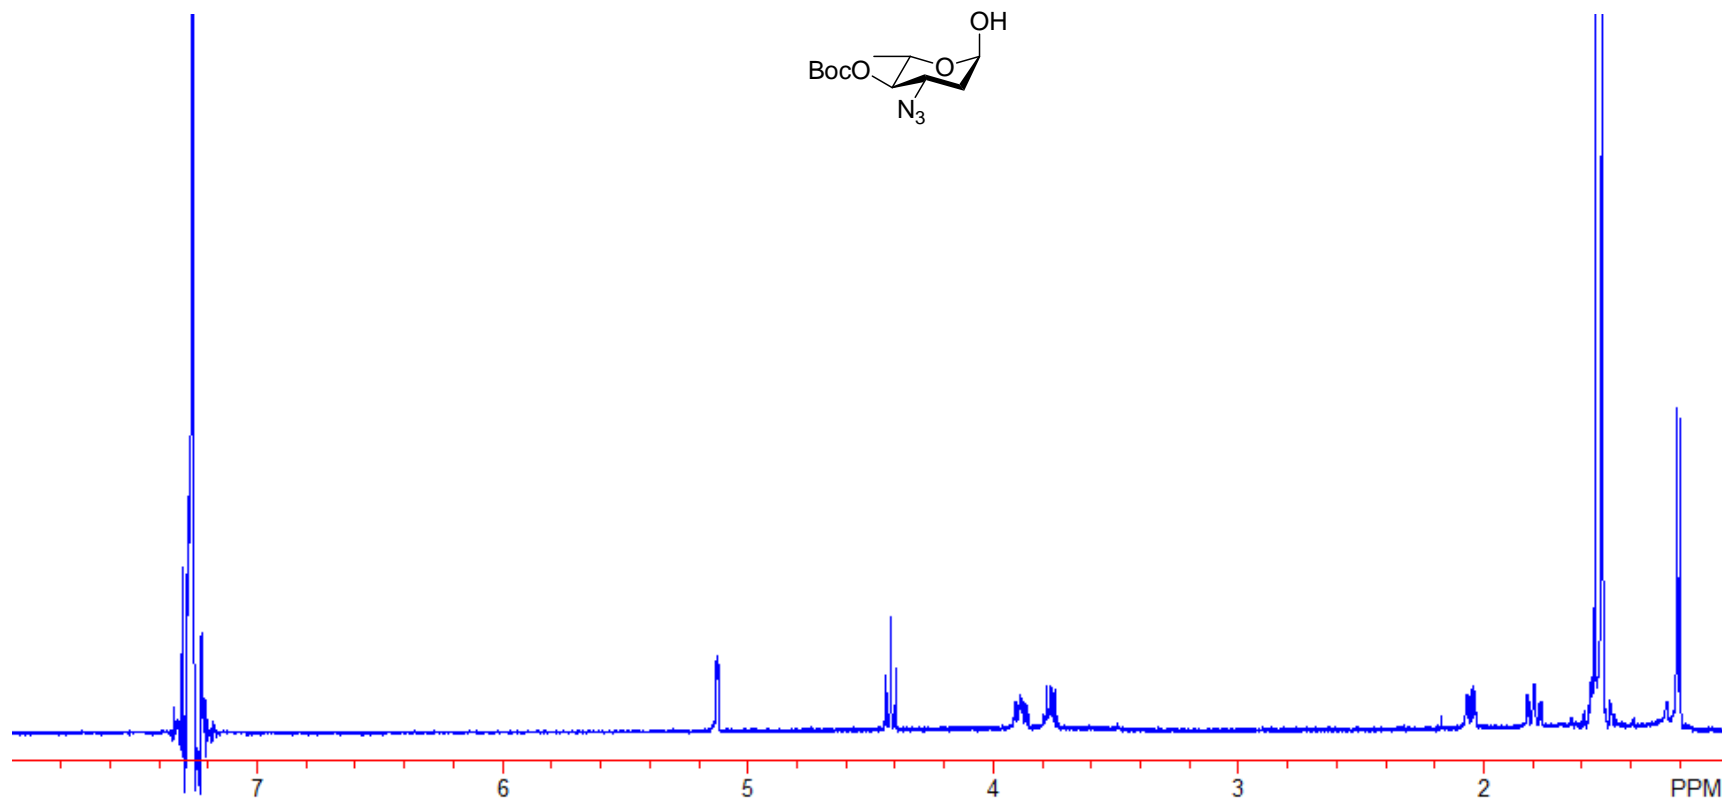

4-*O*-*tert*-butoxycarbonyl-3-azido-2,3,6-trideoxy-1- $\alpha$ -L-*lyxo*-hexopyranoside.

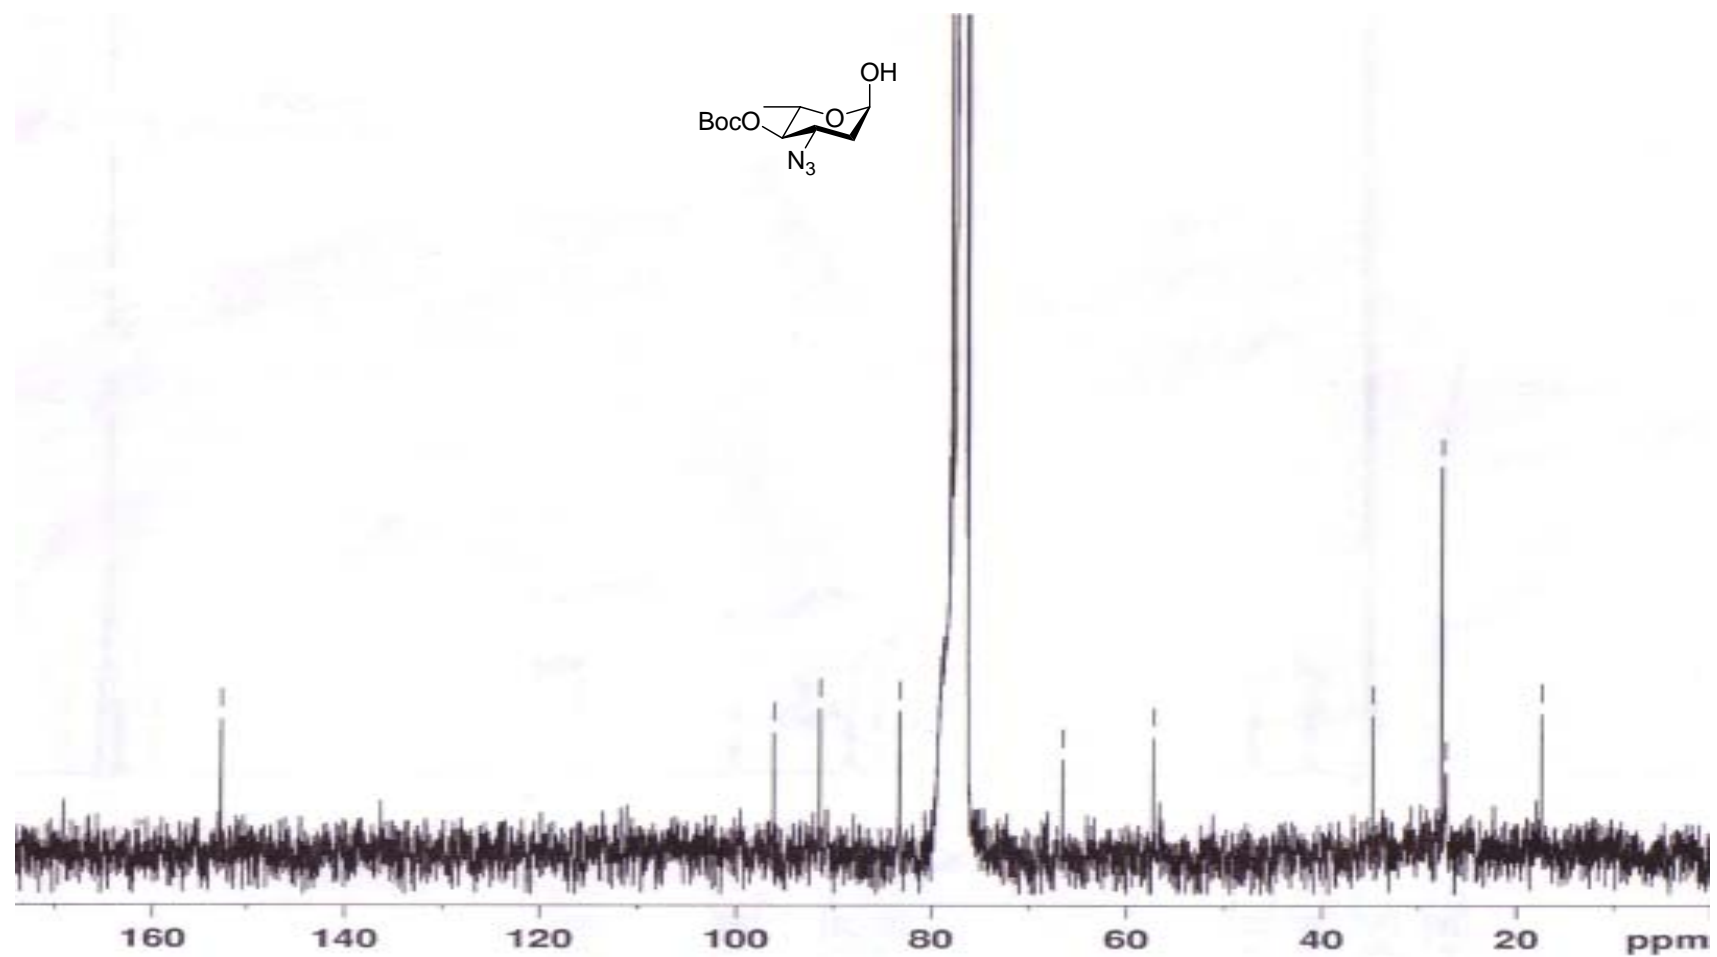

4-*O*-*tert*-butoxycarbonyl-3-azido-2,3,6-trideoxy-1-*L*-*lyxo*-hexopyranosyl acetate (**31**).

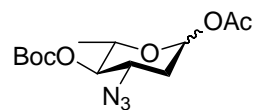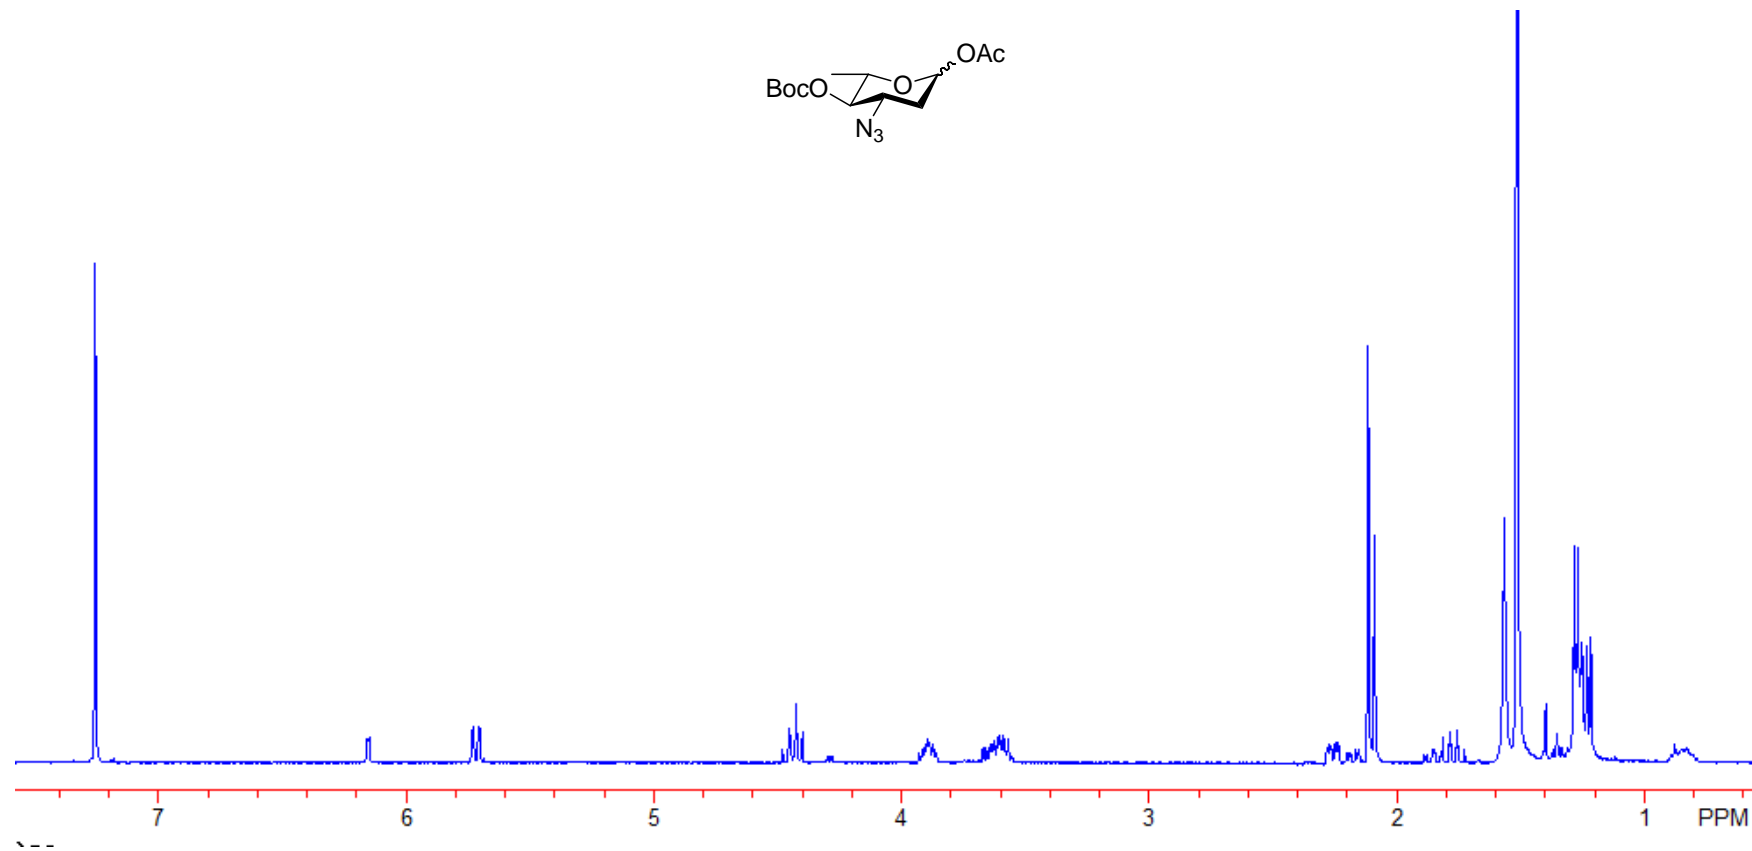

4-*O*-*tert*-butoxycarbonyl-3-azido-2,3,6-trideoxy-1-*L*-*lyxo*-hexopyranosyl acetate (**31**).

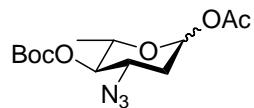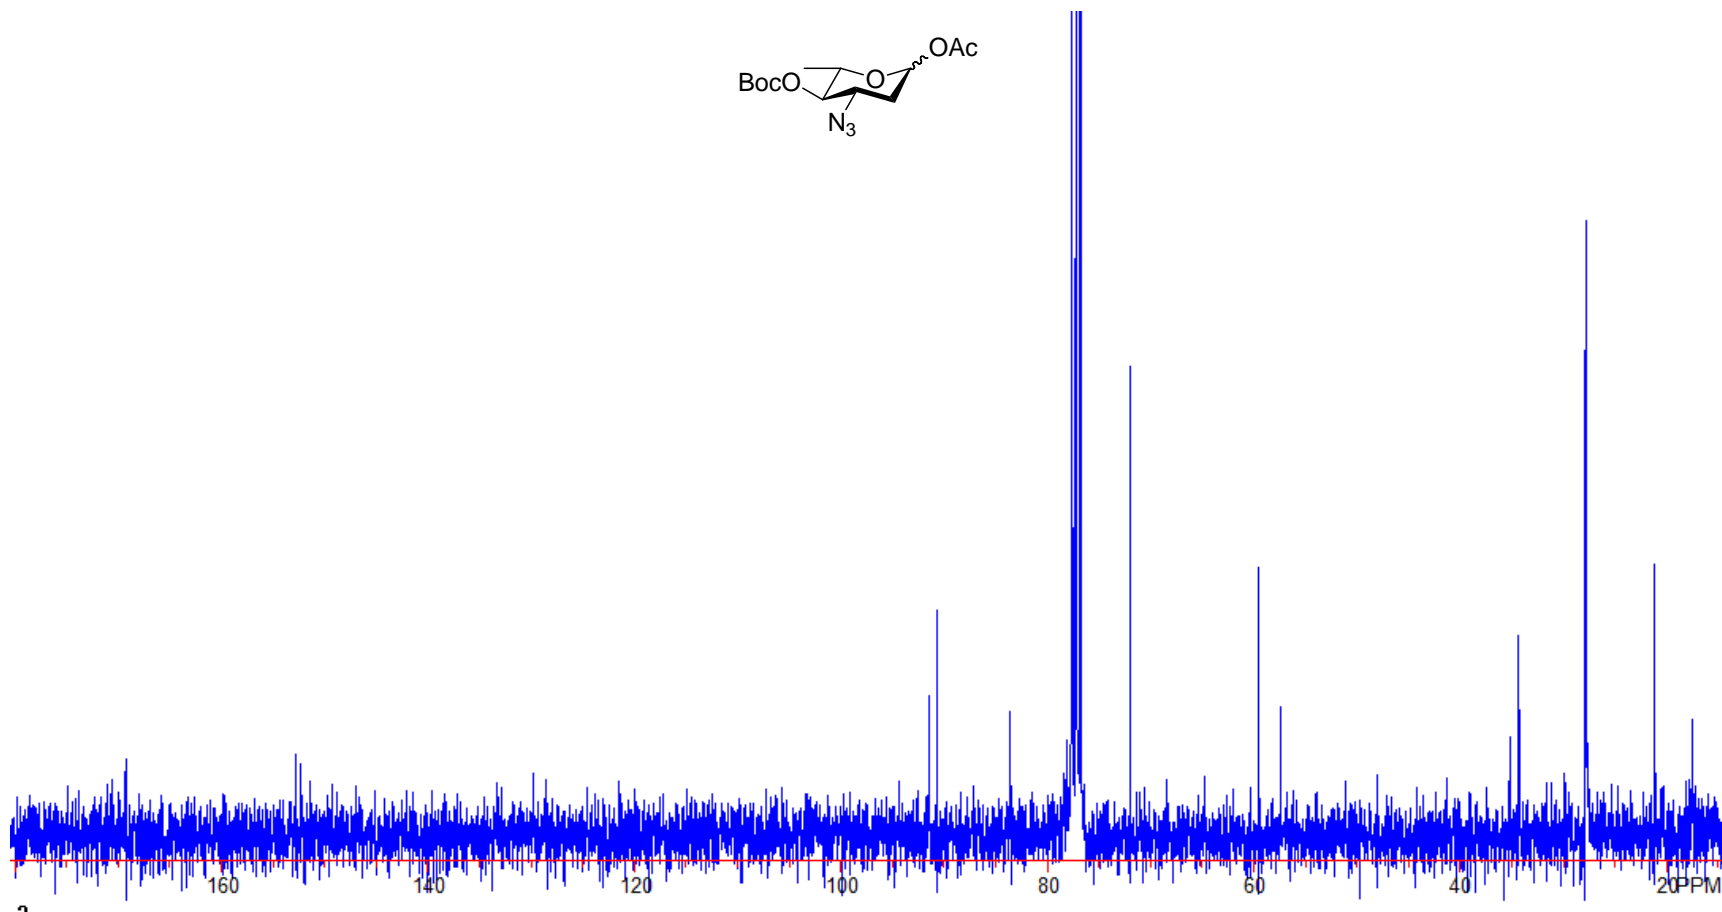

Cyclohexyl 4-*O*-*tert*-butoxycarbonyl-3-azido-2,3,6-trideoxy-1-*L*-lyxo-hexopyranoside (**32**).

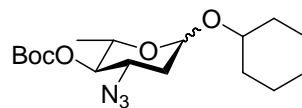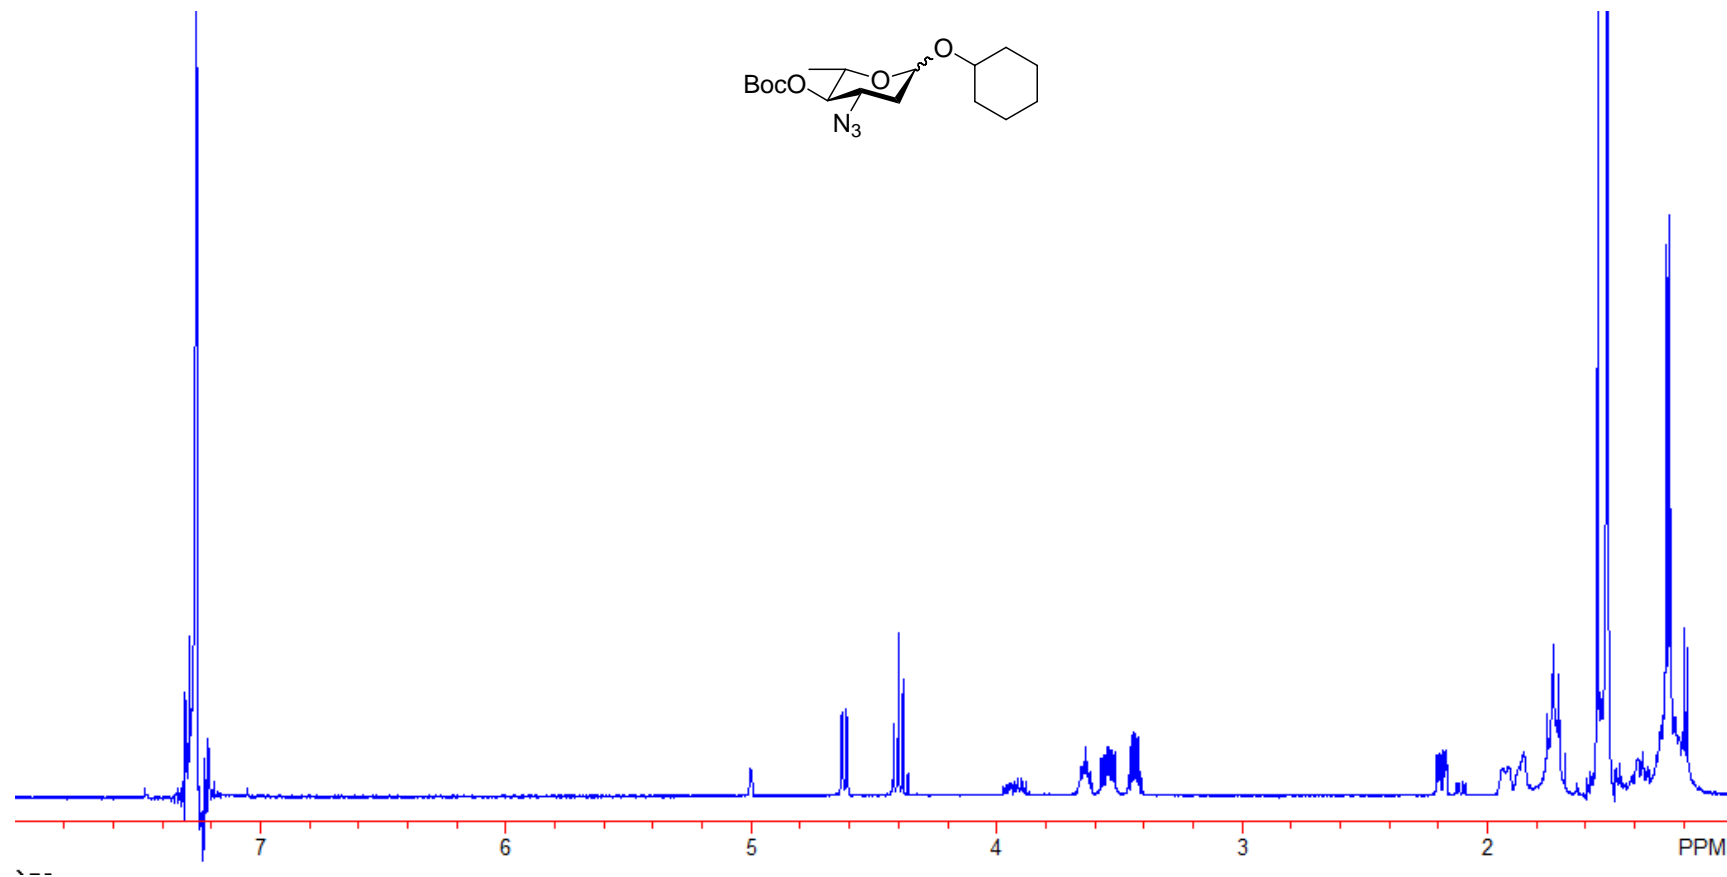

Cyclohexyl 4-*O*-*tert*-butoxycarbonyl-3-azido-2,3,6-trideoxy-1-*L*-lyxo-hexopyranoside (**32**).

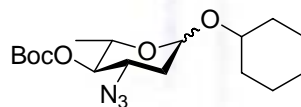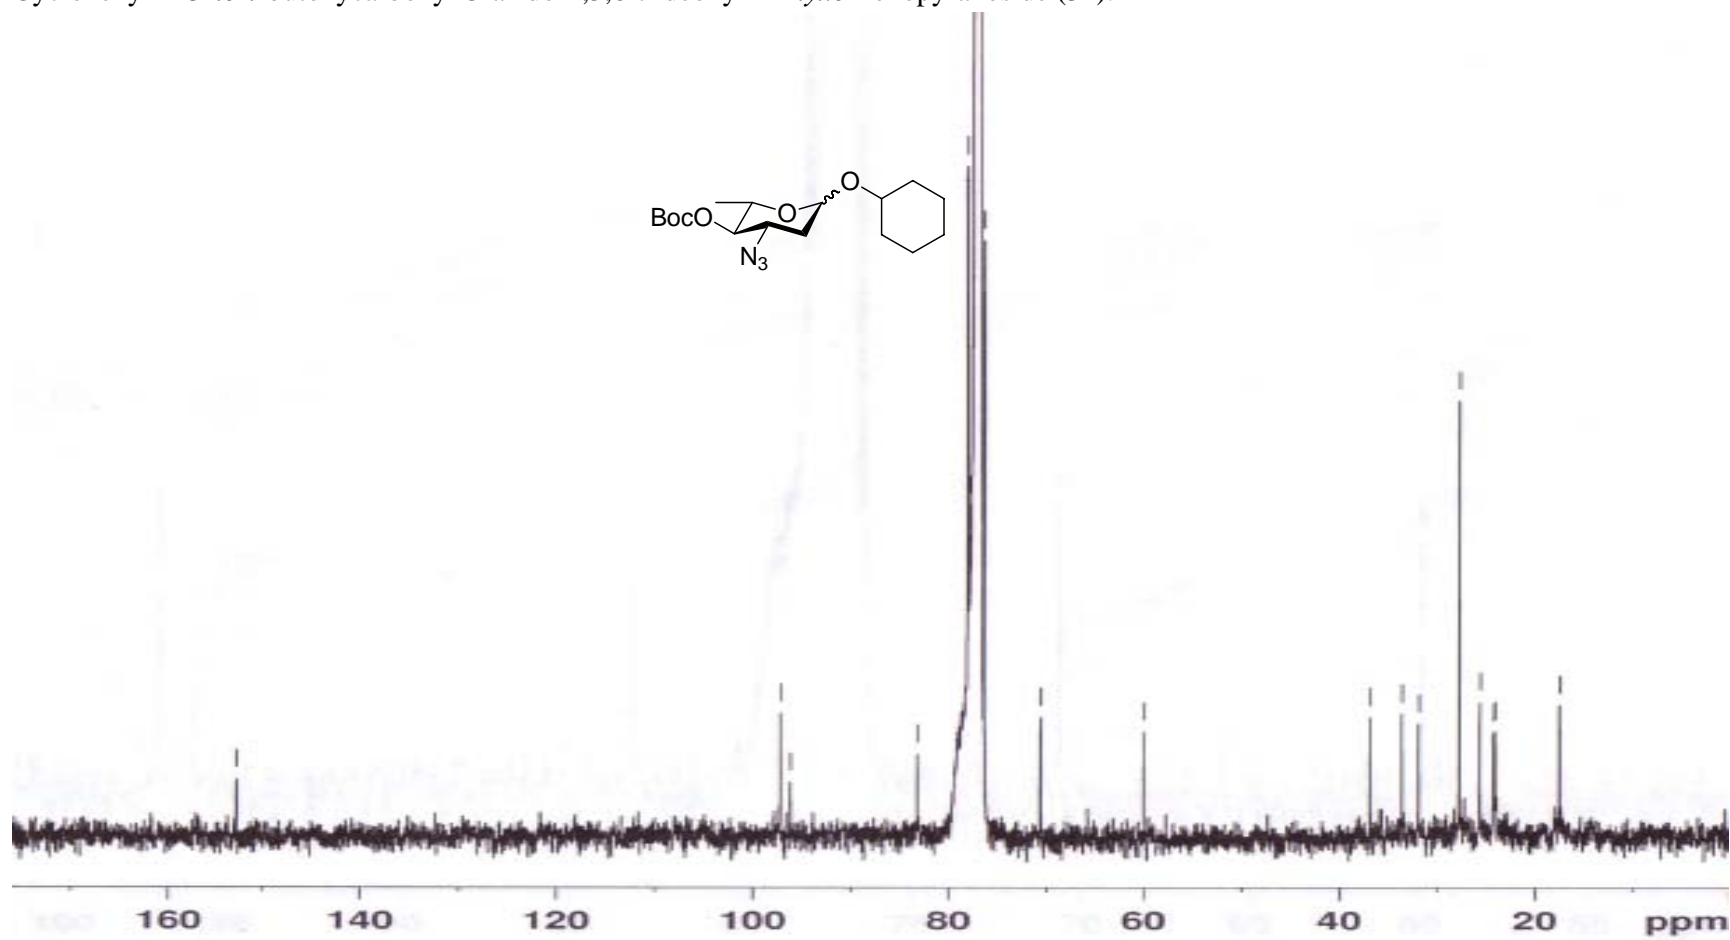

Phenyl 2,3,4-tri-*O*-benzyl-6-*O*-*tert*-butyloxycarbonyl-1-thio- $\beta$ -D-glucopyranoside (**33**)

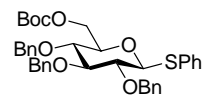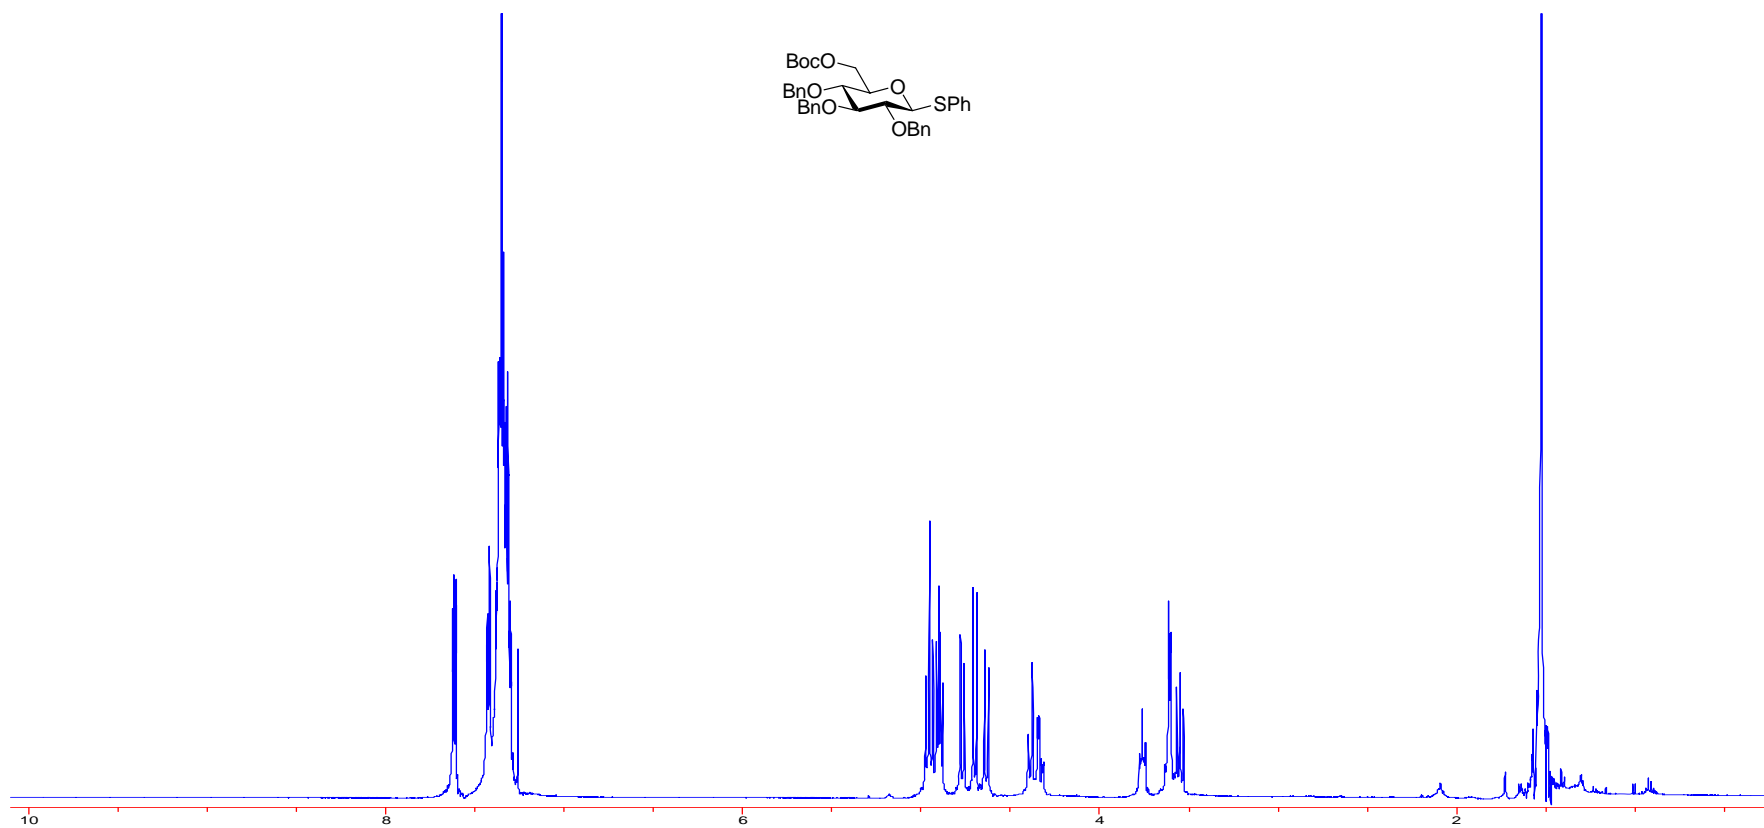



Phenyl 2,3,4-tri-*O*-benzyl-6-*O*-*tert*-butyloxycarbonyl-1-thio- $\beta$ -D-glucopyranoside (**33**)

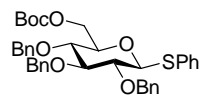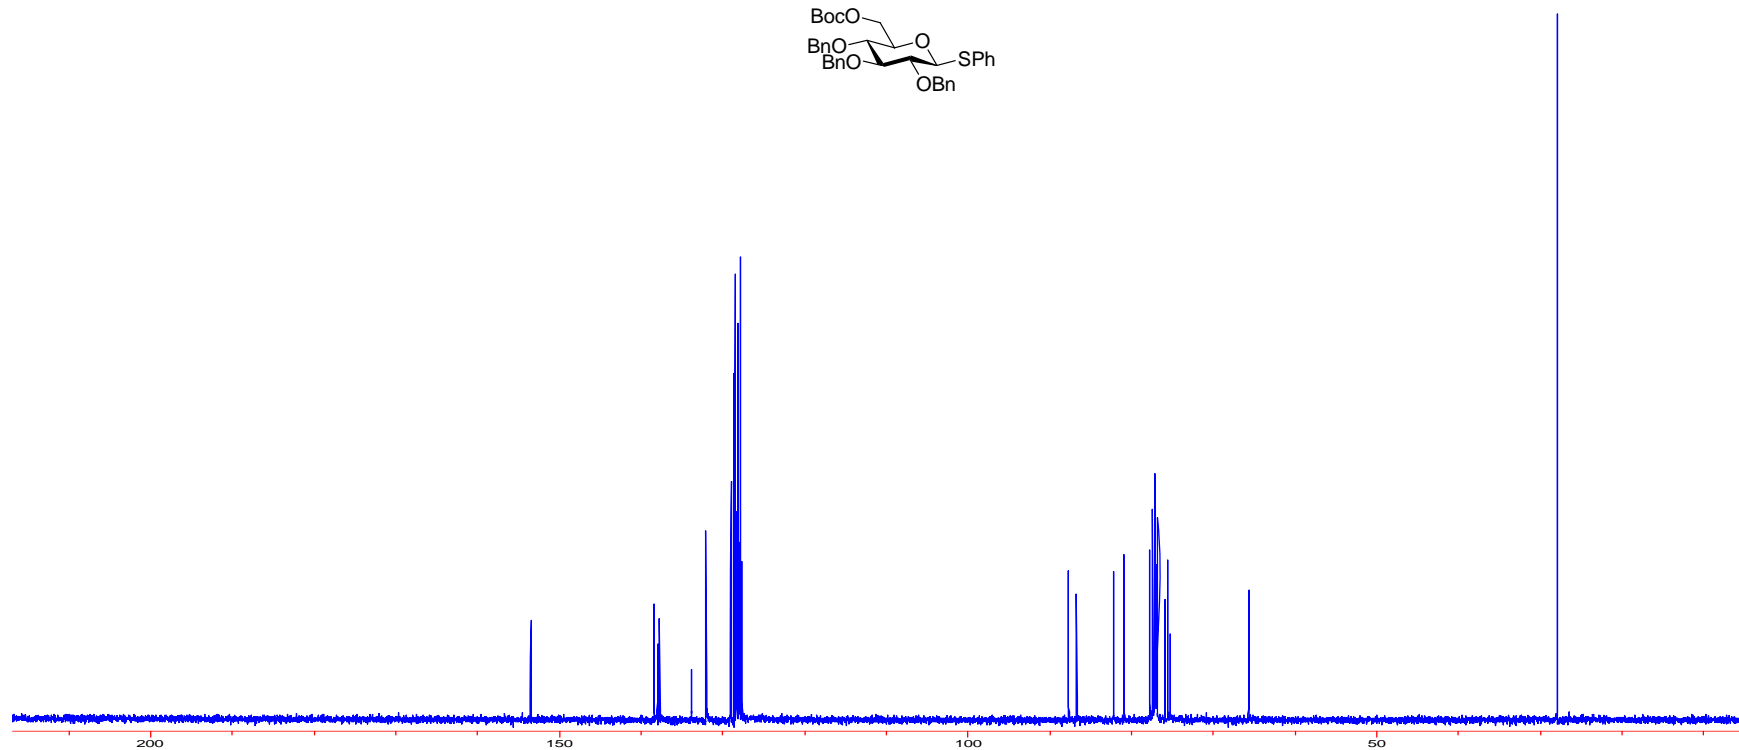

Isopropyl 2,3,4-tri-*O*-benzyl-6-*O*-*tert*-butyloxycarbonyl-D-glucopyranoside (**34a** and **34b**).

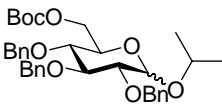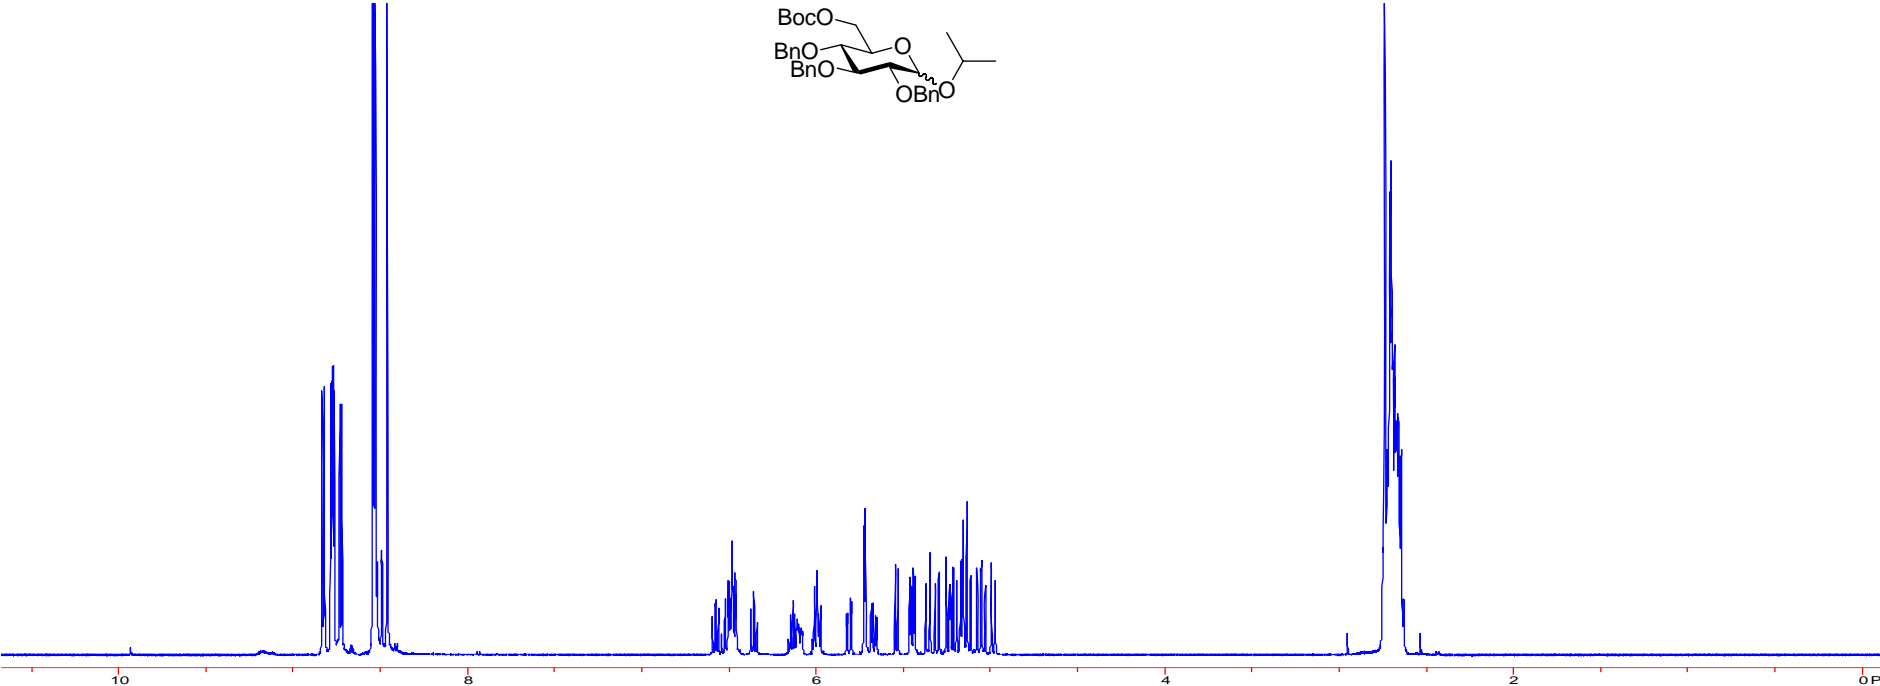

Isopropyl 2,3,4-tri-*O*-benzyl-6-*O*-*tert*-butyloxycarbonyl-D-glucopyranoside (**34a** and **34b**).

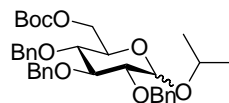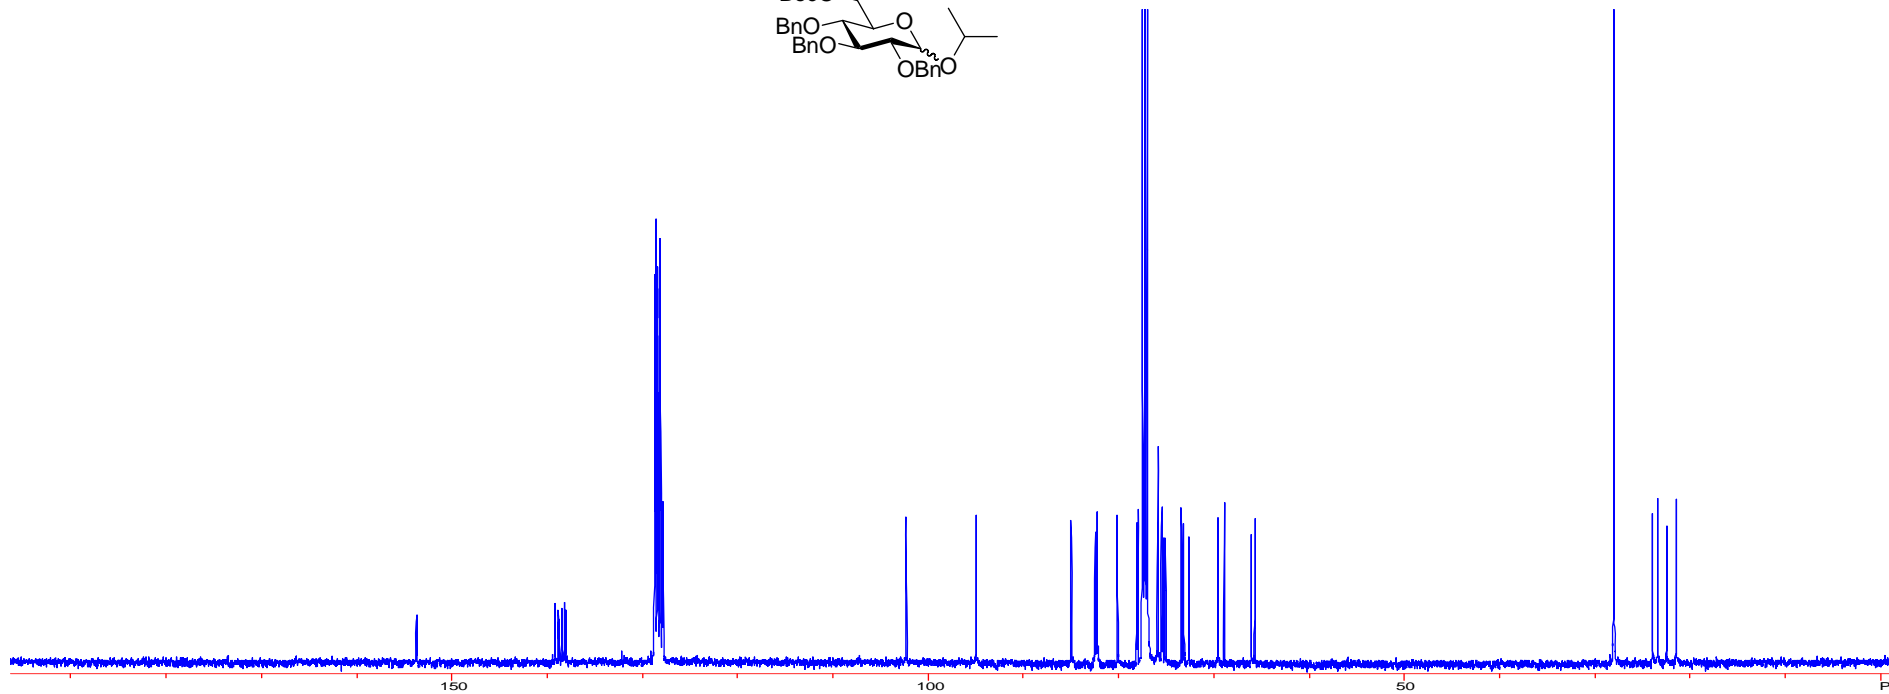

Di-(2,3,4-tri-*O*-benzyl-D-glucopyranoside)-(1,6), (6,1)-dicarbonate (**35**).

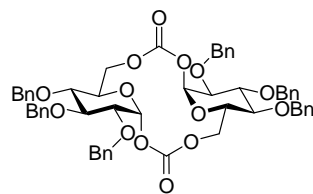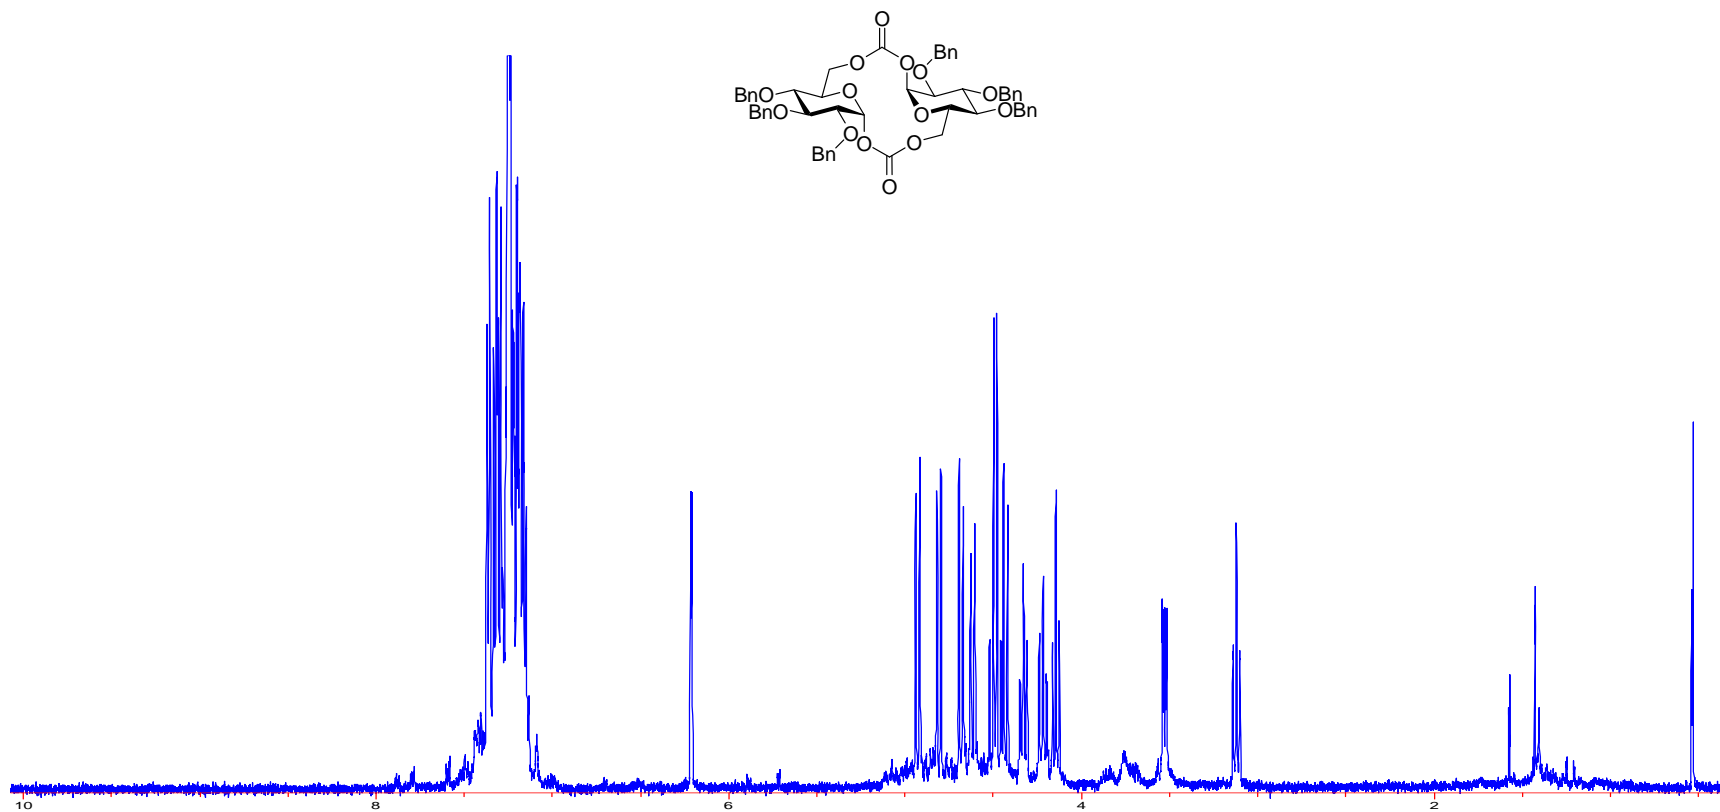

Di-(2,3,4-tri-*o*-benzyl-D-glucopyranoside)-(1,6), (6,1)-dicarbonate (**35**).

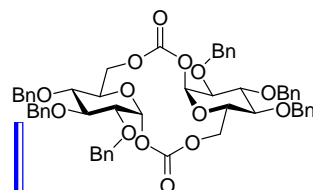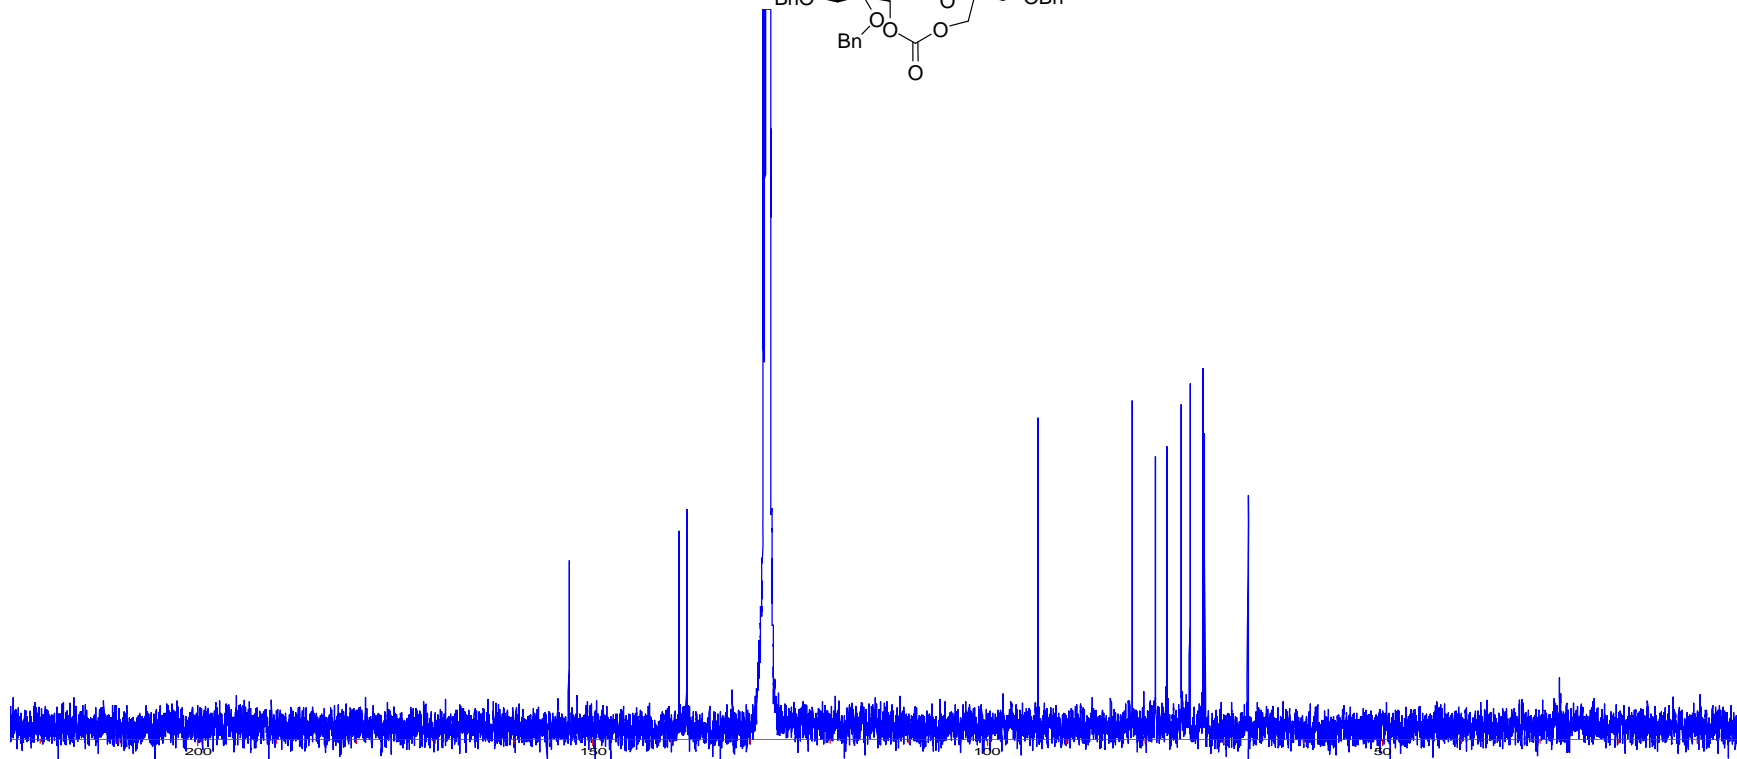

Ethyl 3,4,6-tri-*O*-benzyl-2-*O*-(2-carboxybenzoyl)-1-thio- $\beta$ -D-glucopyranoside (**36**).

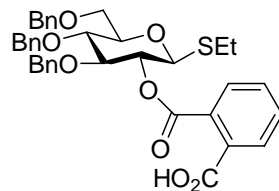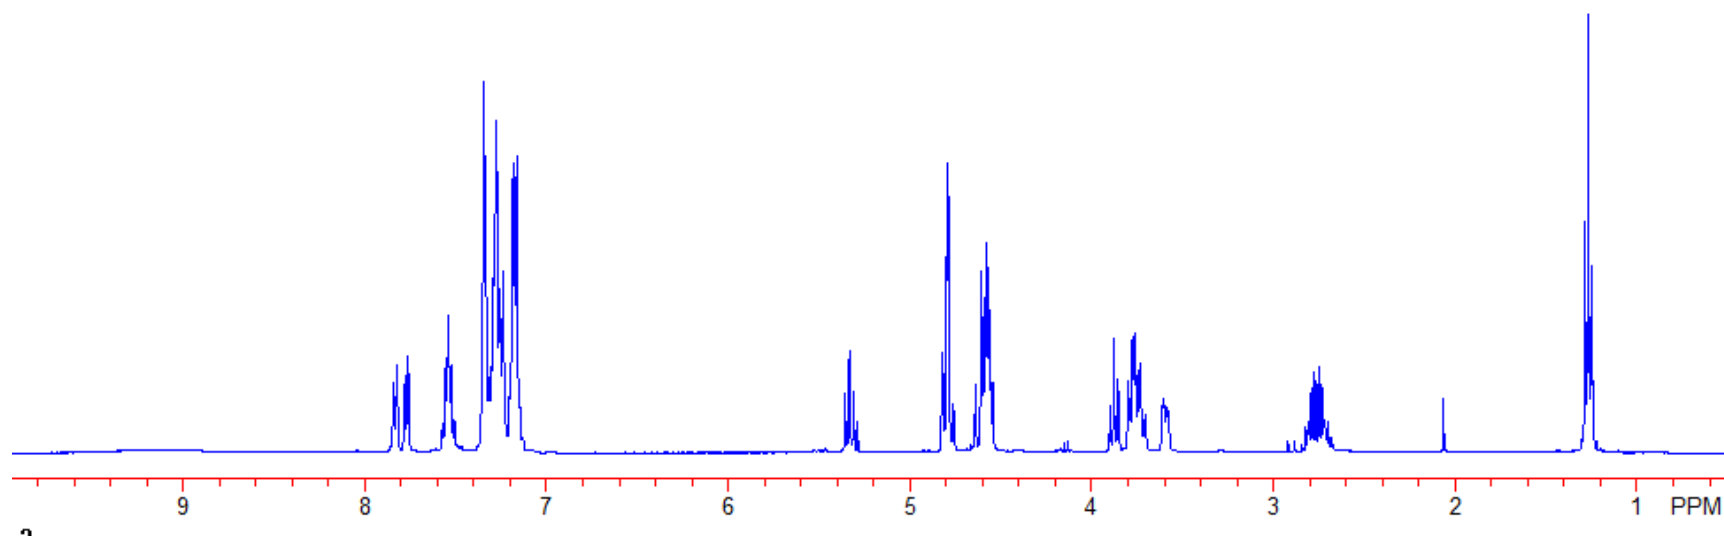

Ethyl 3,4,6-tri-*O*-benzyl-2-*O*-(2-carboxybenzoyl)-1-thio- $\beta$ -D-glucopyranoside (**36**).

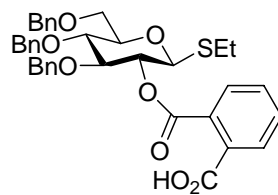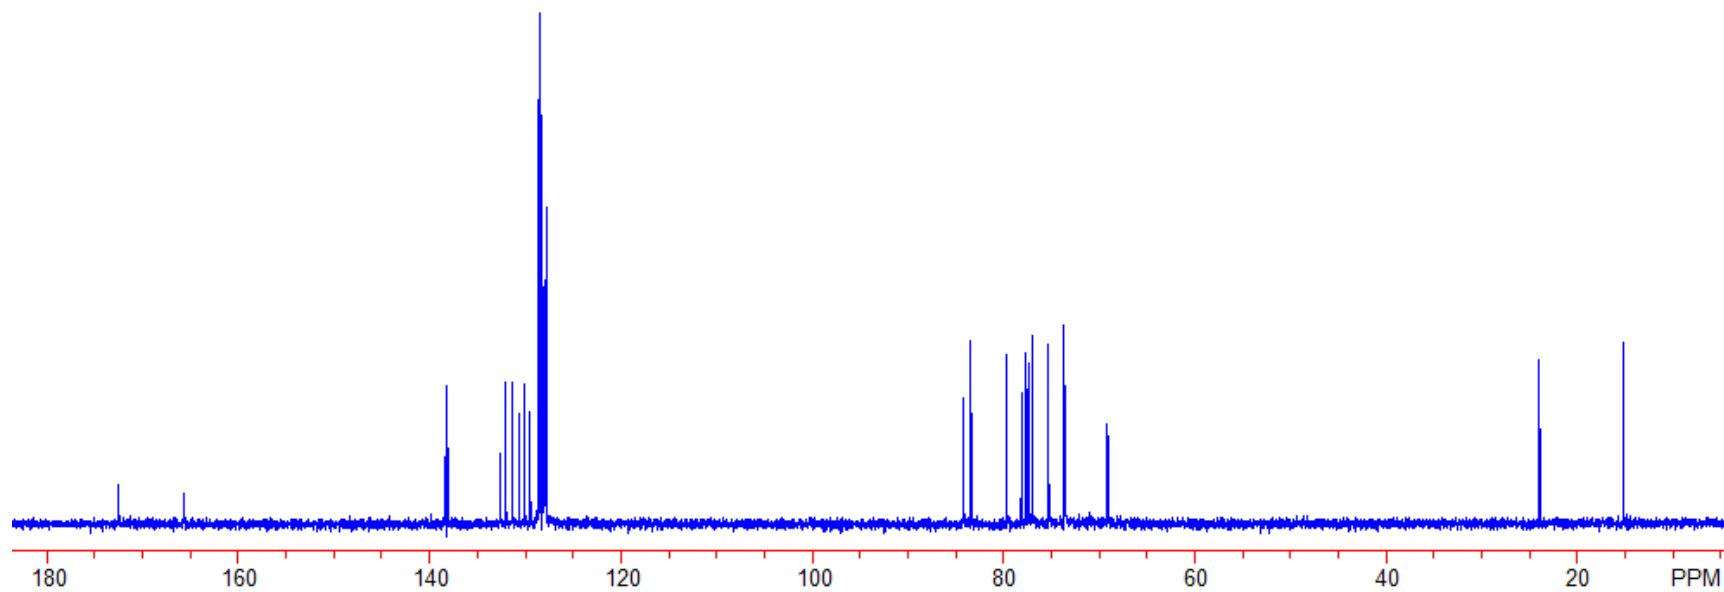

3,4,6-Tri-O-benzyl-1,2-O-phthalidylidene- $\alpha$ -D-glucopyranose (**37**).

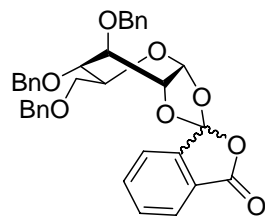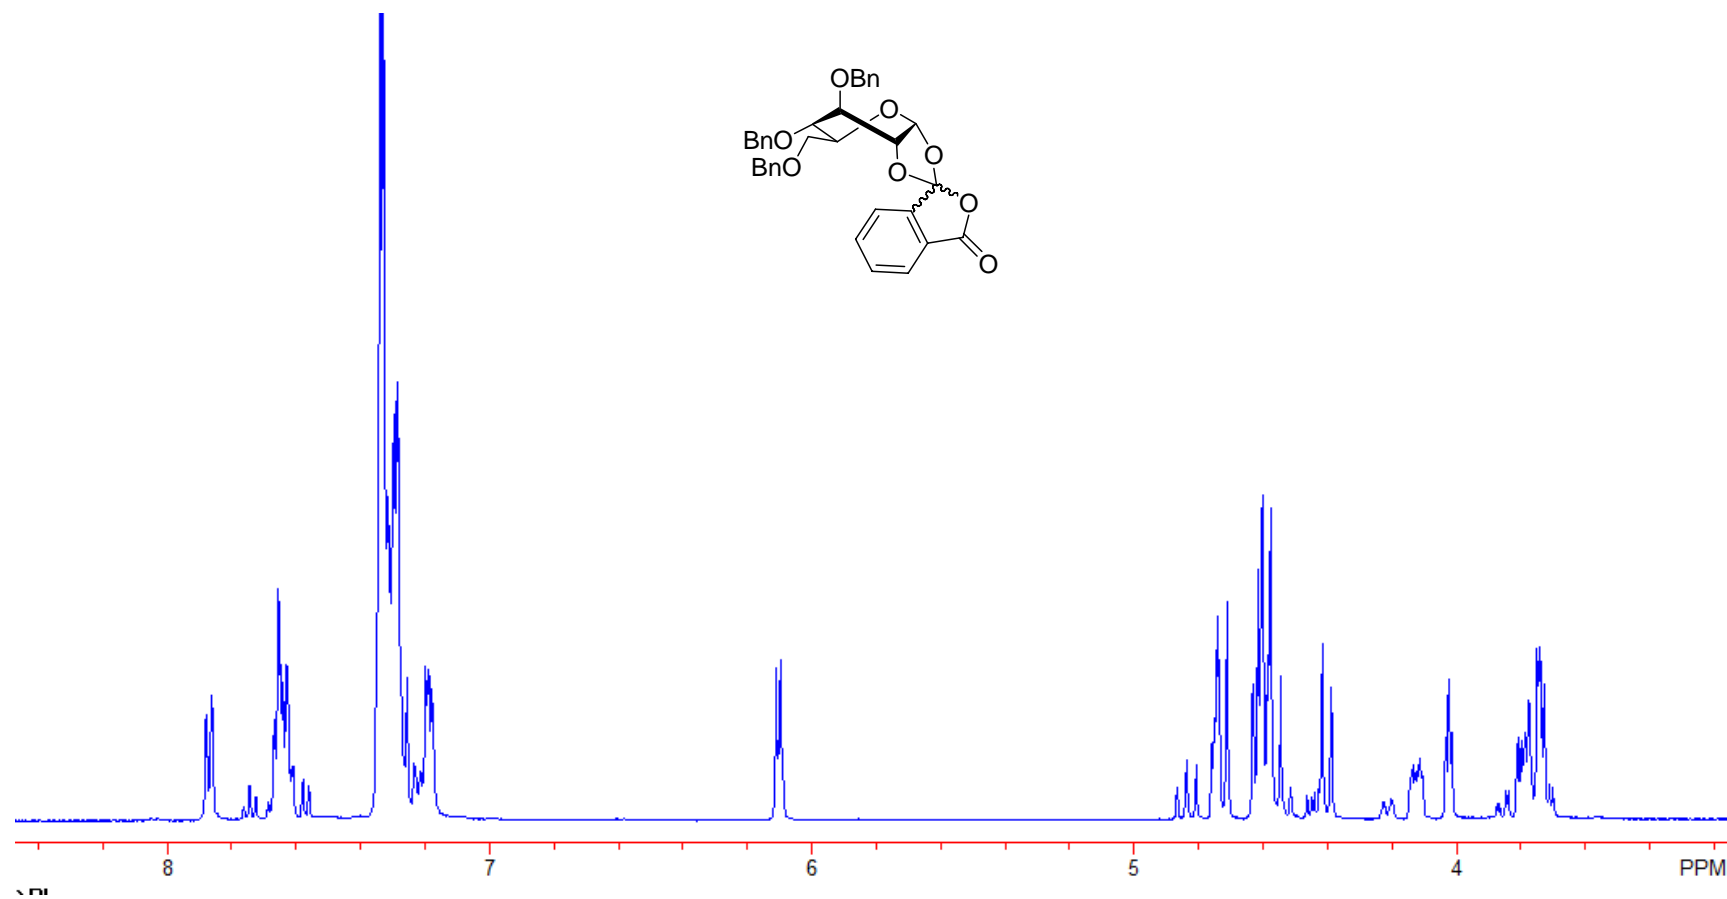



3,4,6-*Tri*-O-benzyl-1,2-O-phthalidylidene- $\alpha$ -D-glucofuranose (**37**).

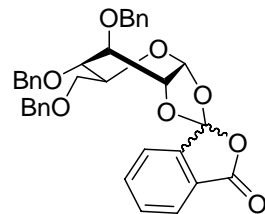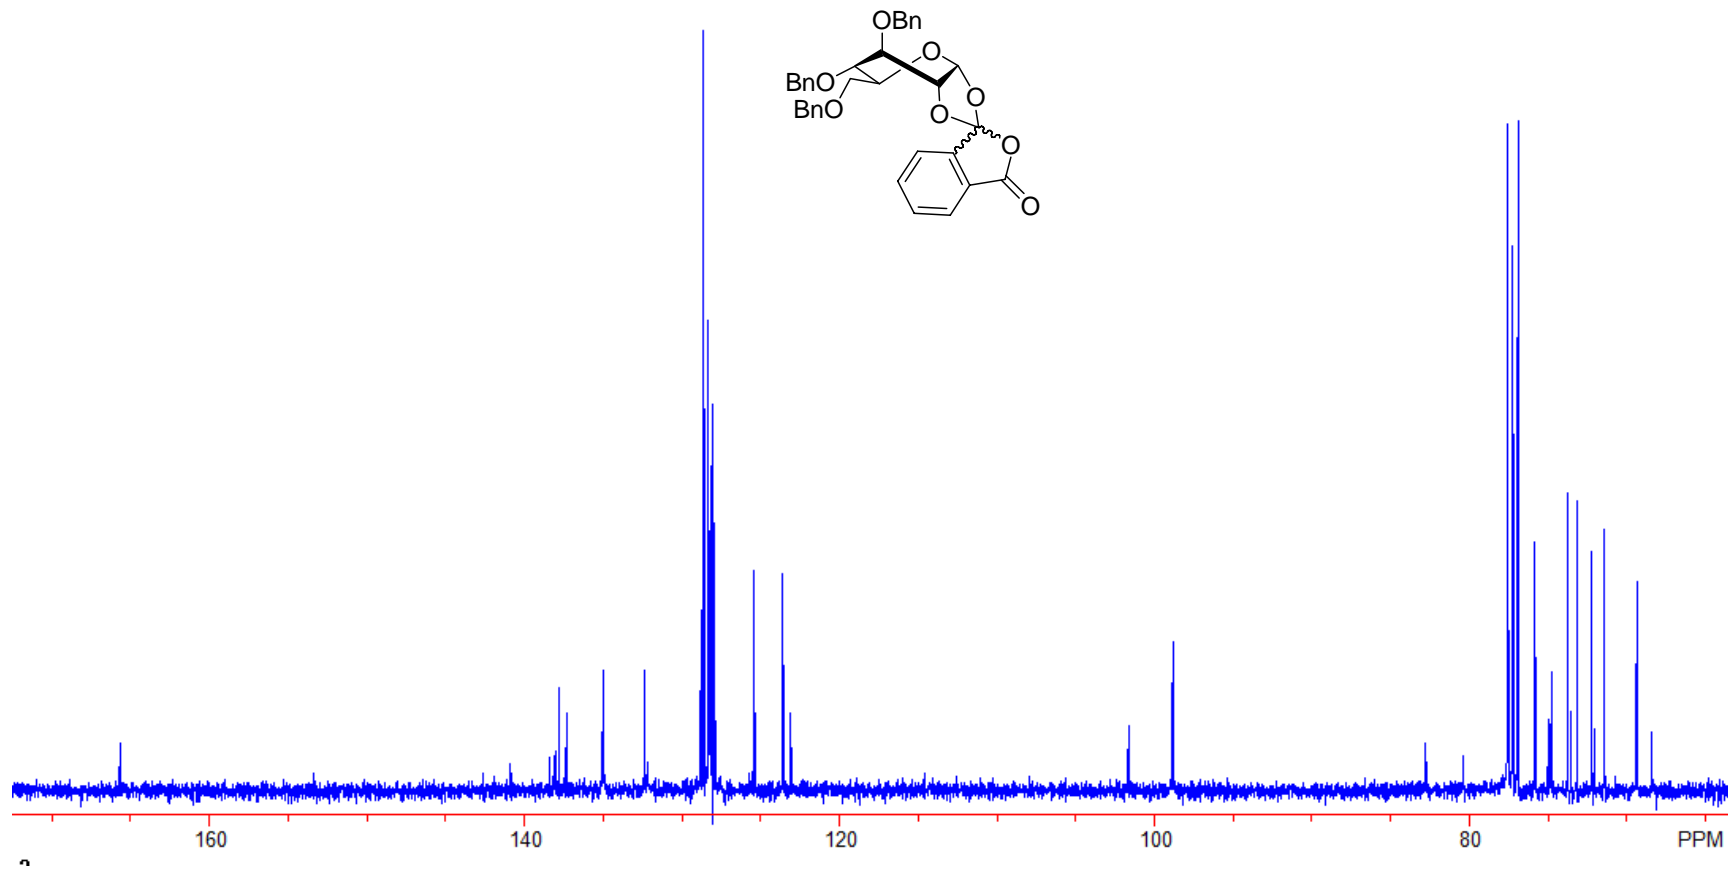

Phenyl 2,3,6-tri-*O*-benzyl-4-*O*-(2-carboxybenzoyl)-1-thio- $\beta$ -D-galactopyranoside (**38**).

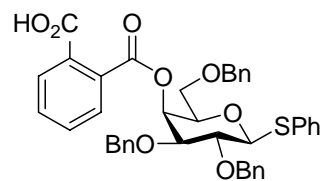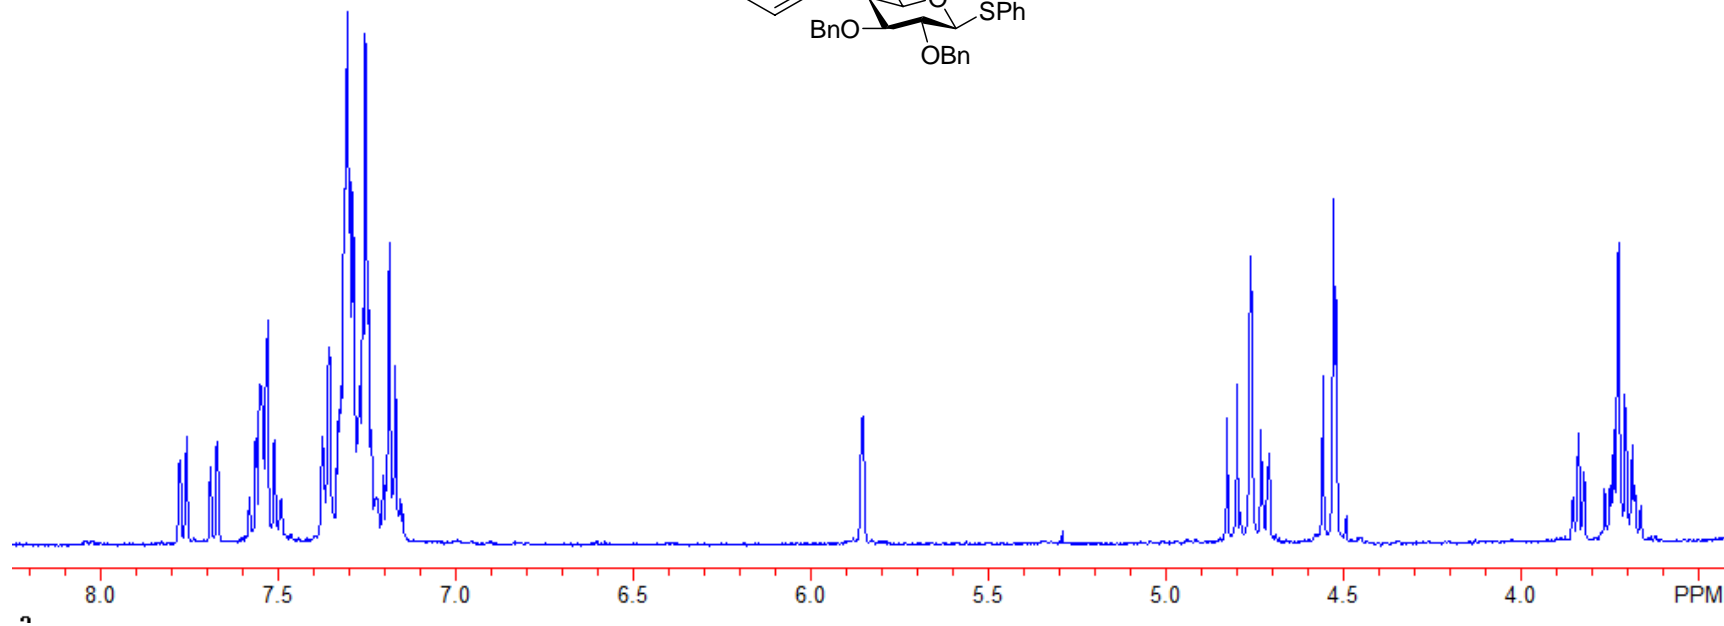

Phenyl 2,3,6-tri-*O*-benzyl-4-*O*-(2-carboxybenzoyl)-1-thio- $\beta$ -D-galactopyranoside (**38**).

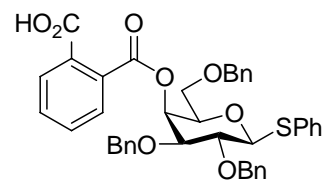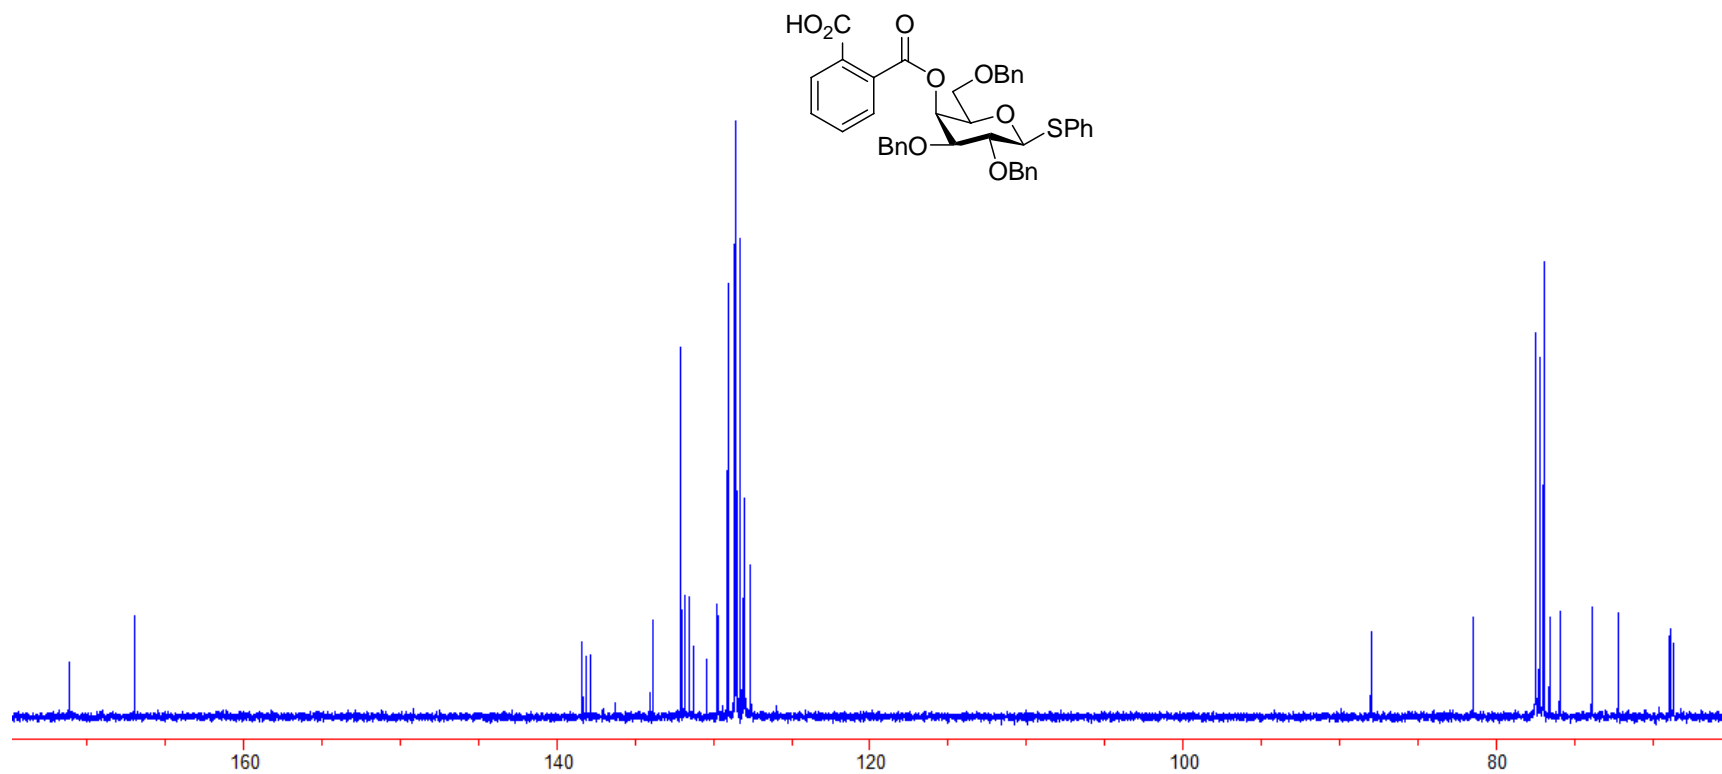

3,4,6-Tri-*O*-benzyl-1,2-*O*-phthaloyl- $\beta$ -D-galactopyranoside (**40**).

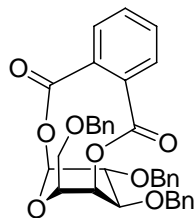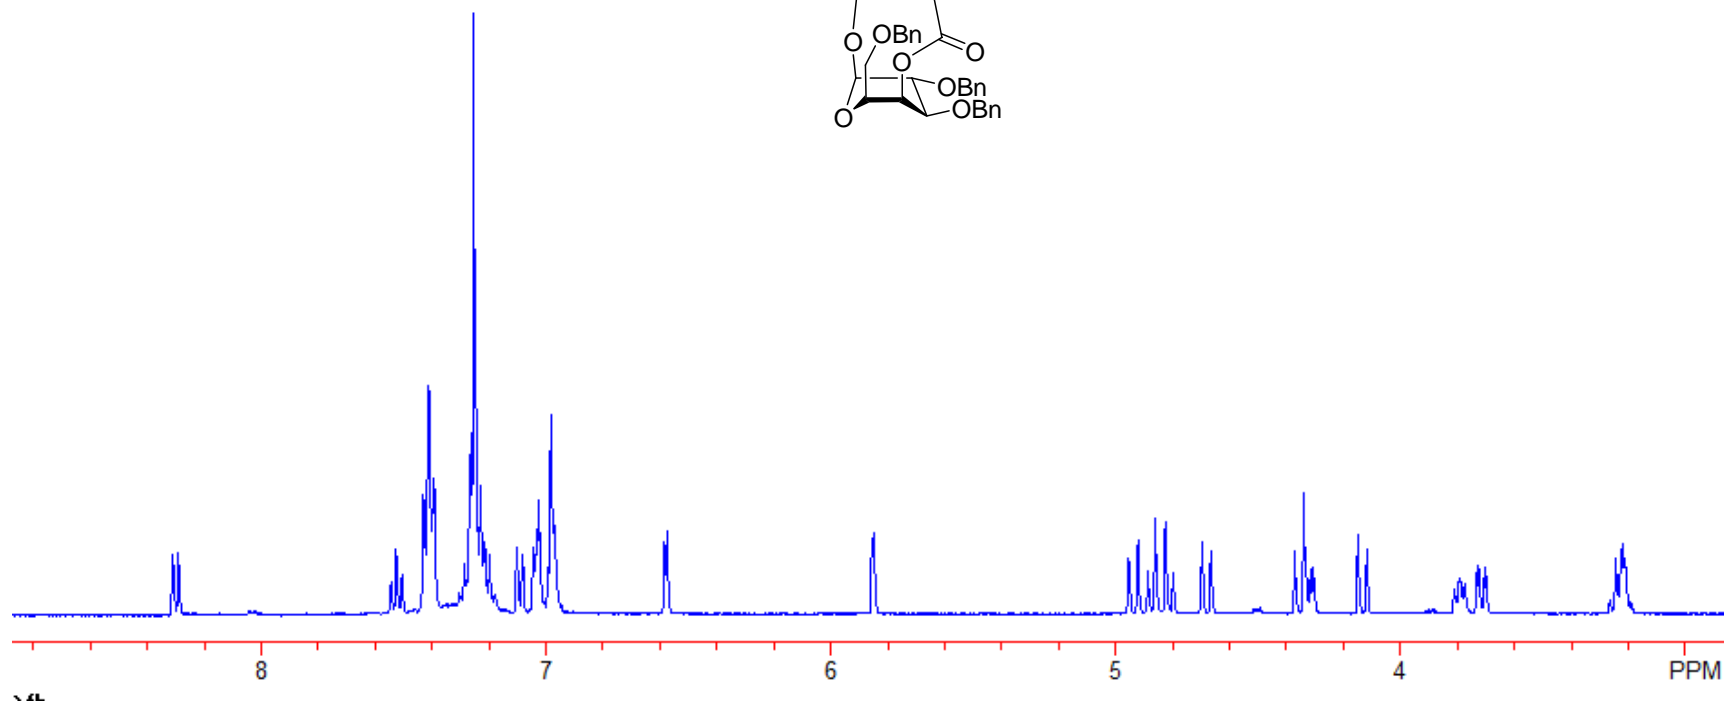

3,4,6-Tri-*O*-benzyl-1,2-*O*-phthaloyl- $\beta$ -D-galactopyranoside (**40**).

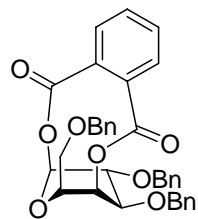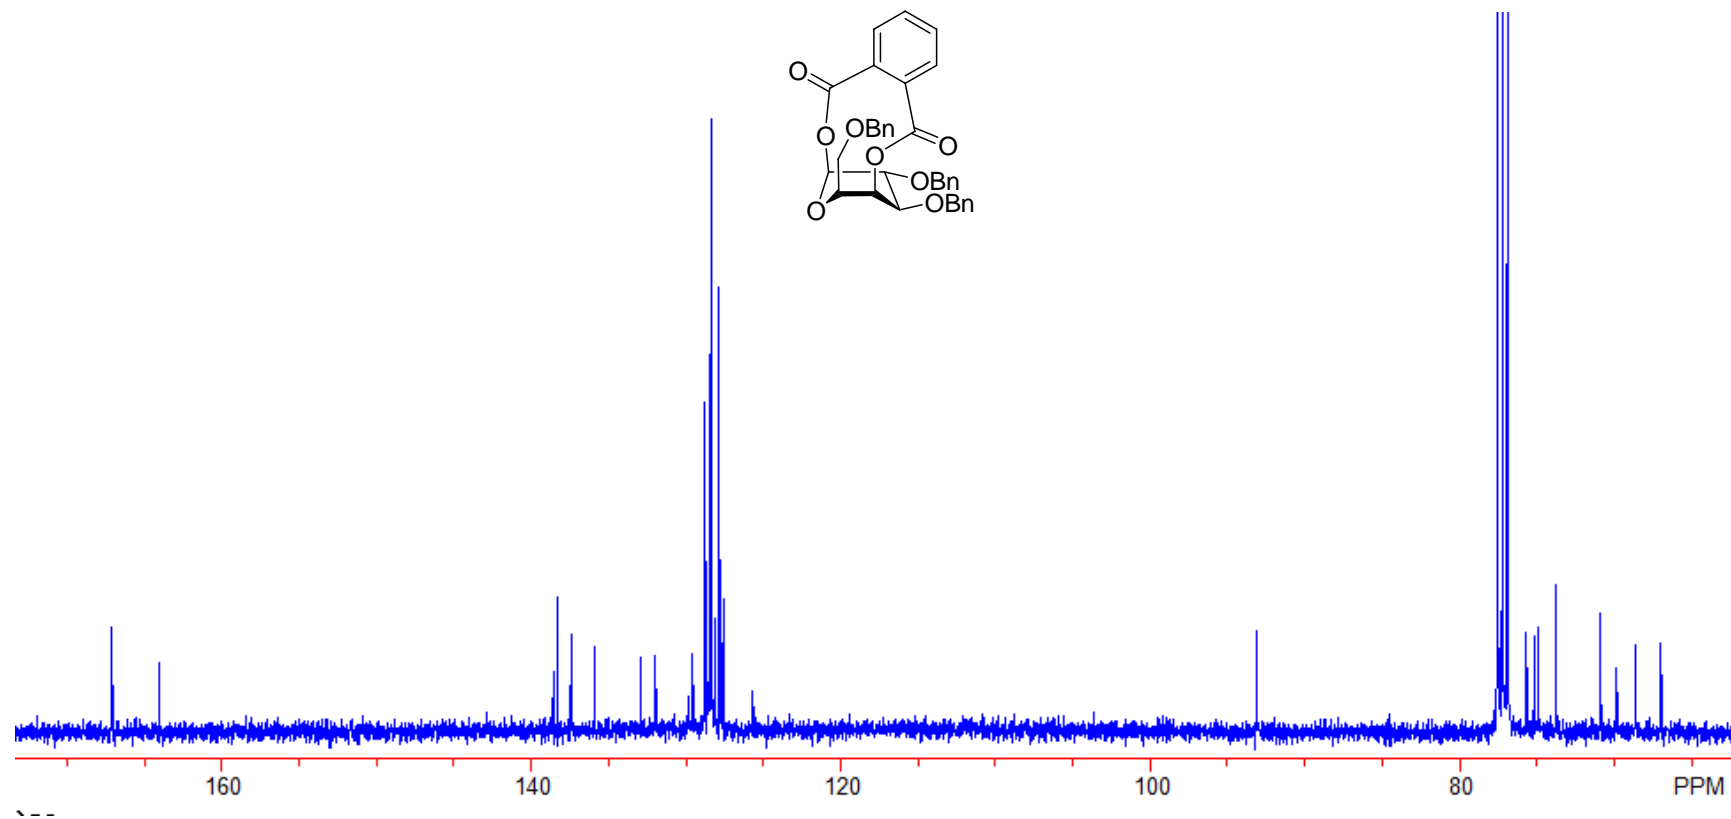

Phenyl 2,3,6-tri-*O*-benzyl-4-*O*-(4-methoxybenzoyl)-1-thio- $\beta$ -D-galactopyranoside (**41**).

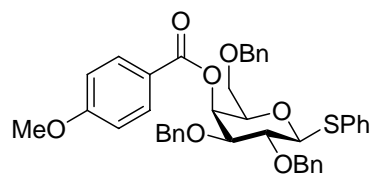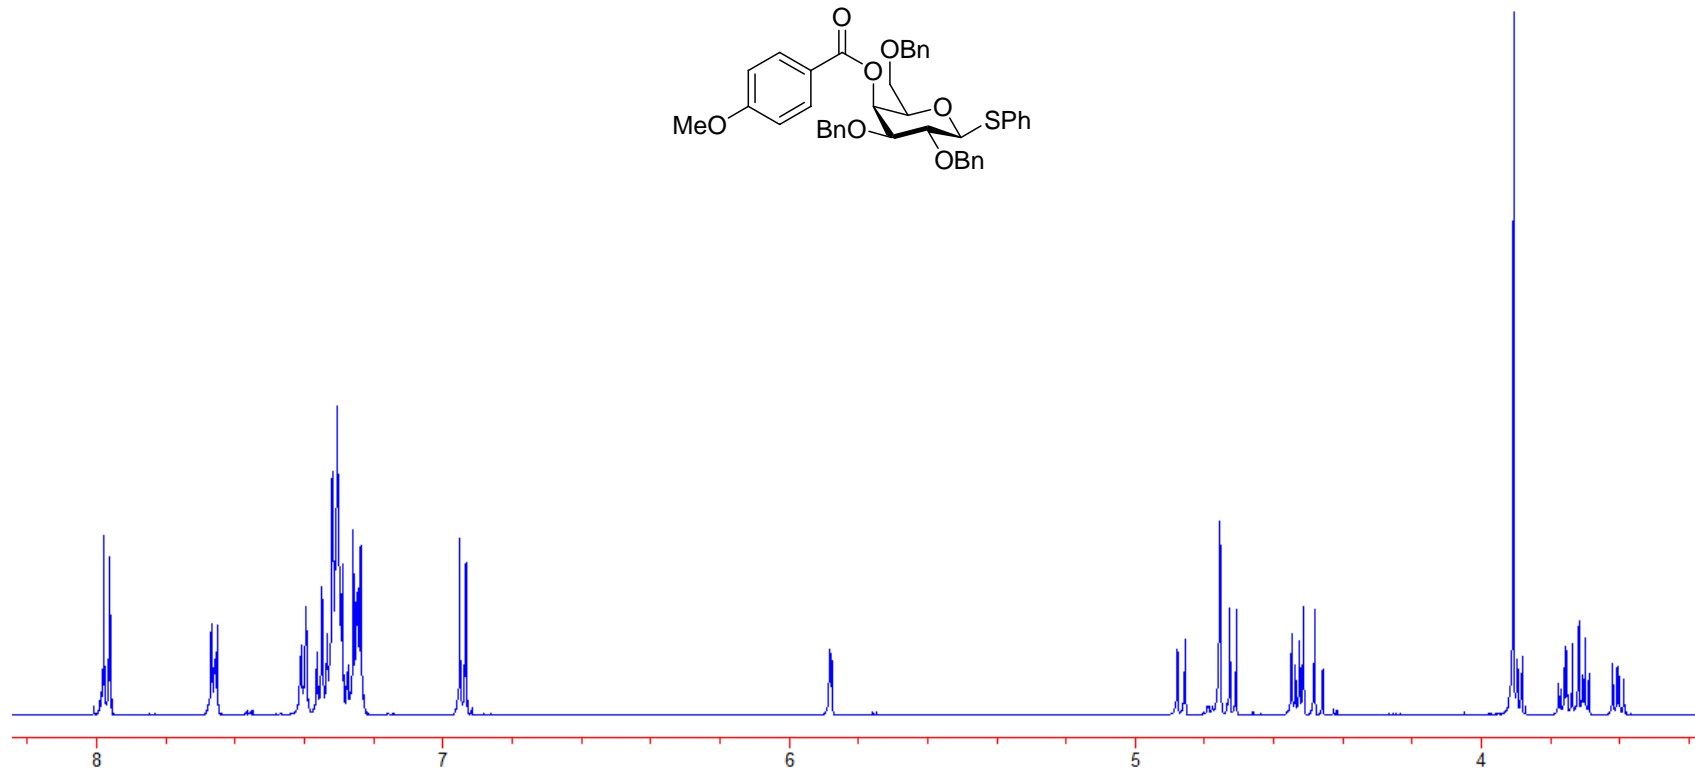

Phenyl 2,3,6-tri-*O*-benzyl-4-*O*-(4-methoxybenzoyl)-1-thio- $\beta$ -D-galactopyranoside (**41**).

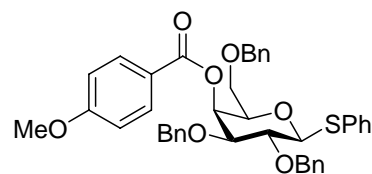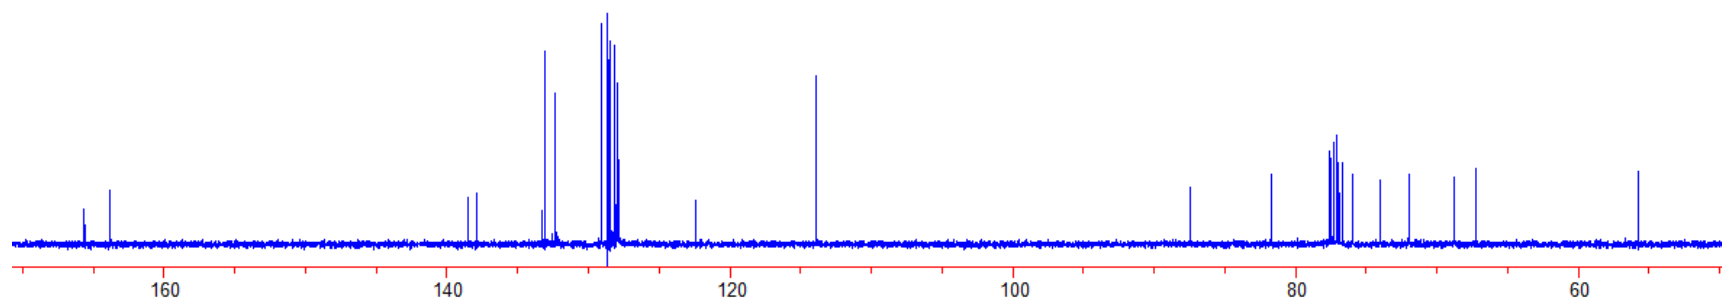

2,3,6-Tri-*O*-benzyl-4-*O*-(4-methoxybenzoyl)- $\alpha$ -D-[1-<sup>16/18</sup>O]-galactopyranoside (**43**).

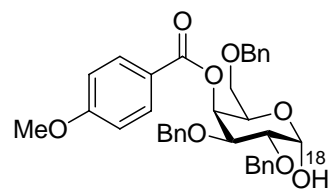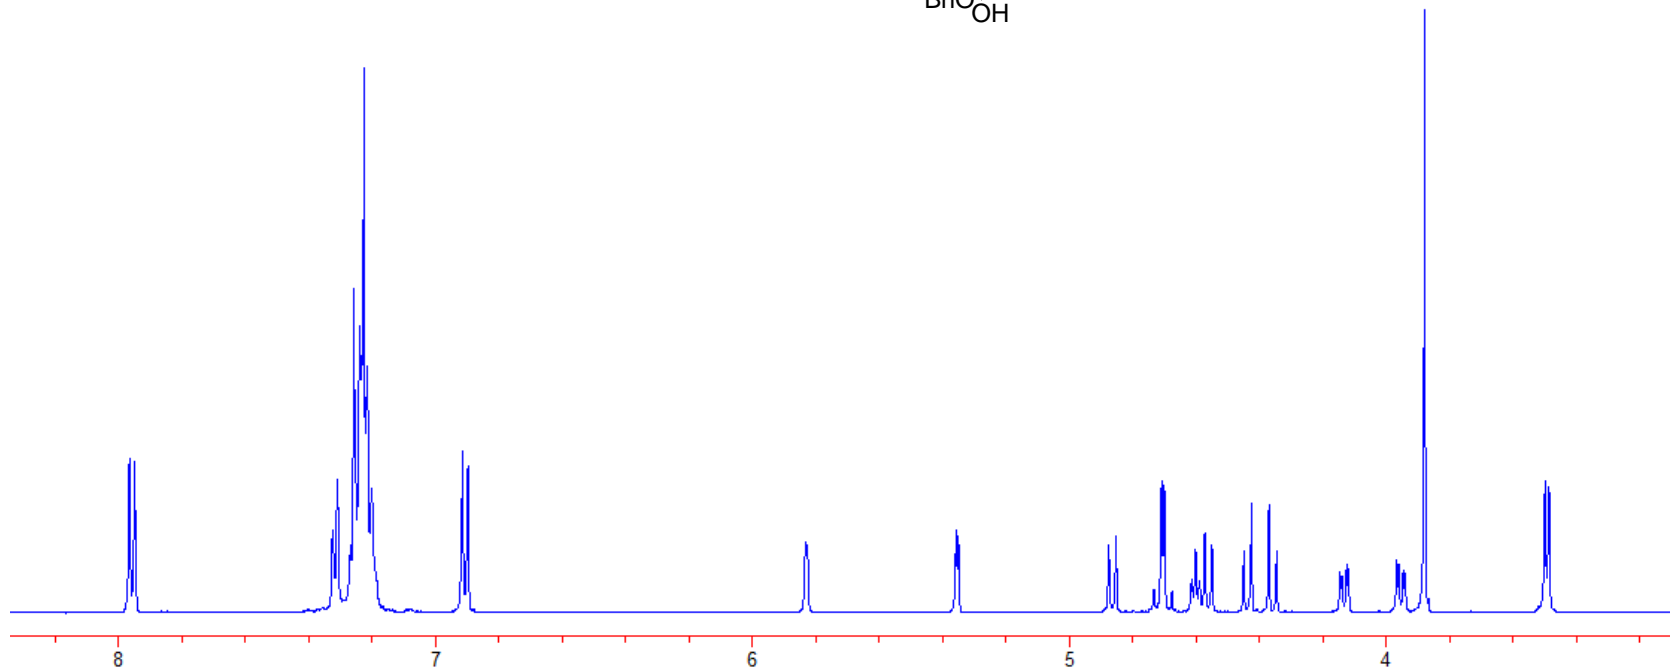



2,3,6-Tri-*O*-benzyl-4-*O*-(4-methoxybenzoyl)- $\alpha$ -D-[1-<sup>16/18</sup>O]-galactopyranoside (**43**).

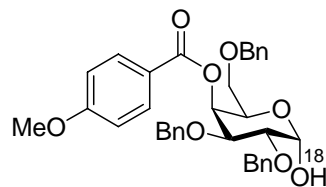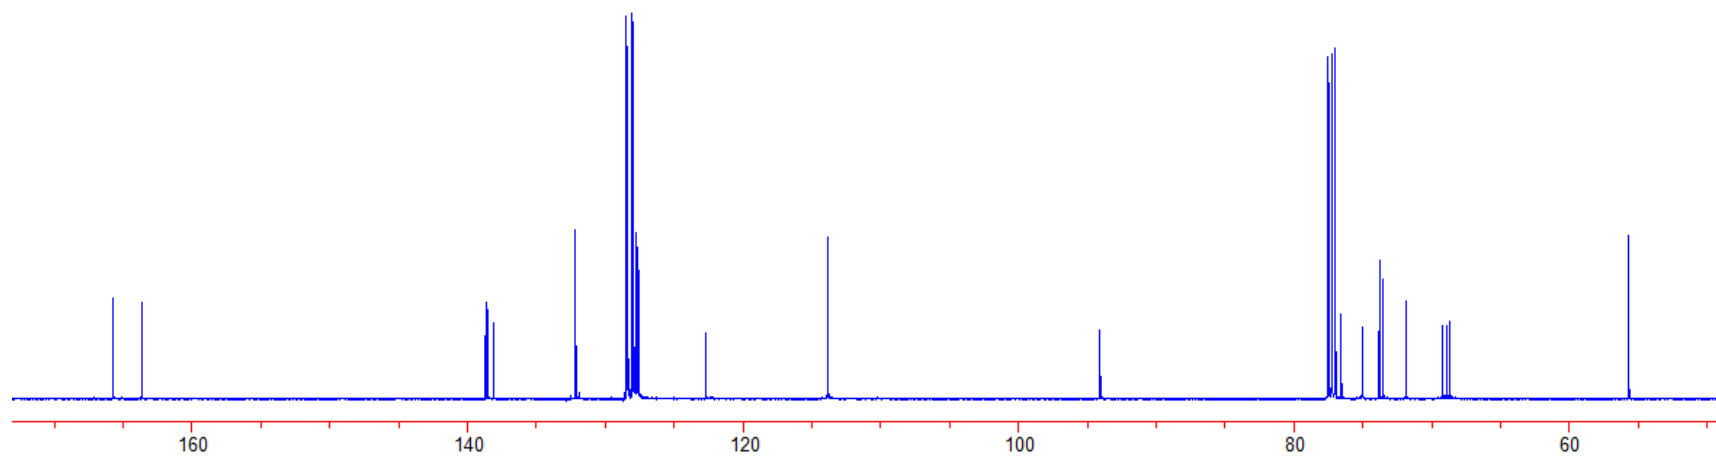

2,3,6-Tri-*O*-benzyl-4-*O*-(4-methoxybenzoyl)- $\alpha$ -D-[1-<sup>16/18</sup>O]-galactopyranoside (**43**, expansion).

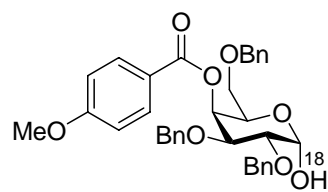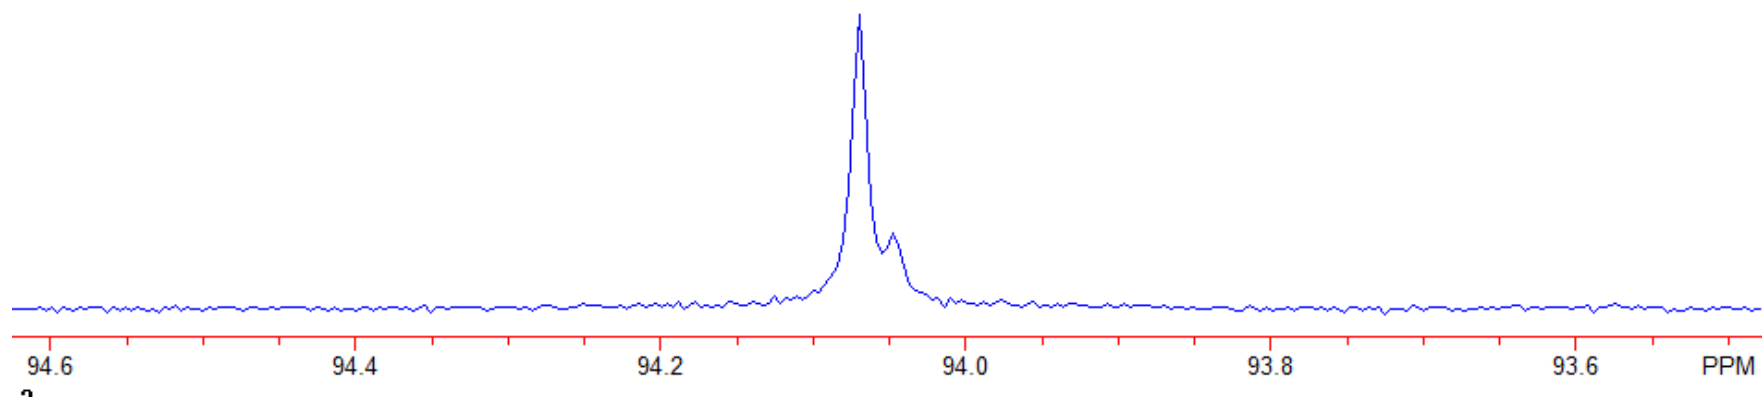

2,3,6-Tri-*O*-benzyl-4-*O*-(4-methoxybenzoyl)- $\alpha$ -D-[1-<sup>16/18</sup>O]-galactopyranoside (**43**, expansion).

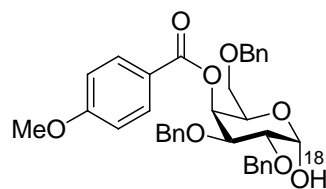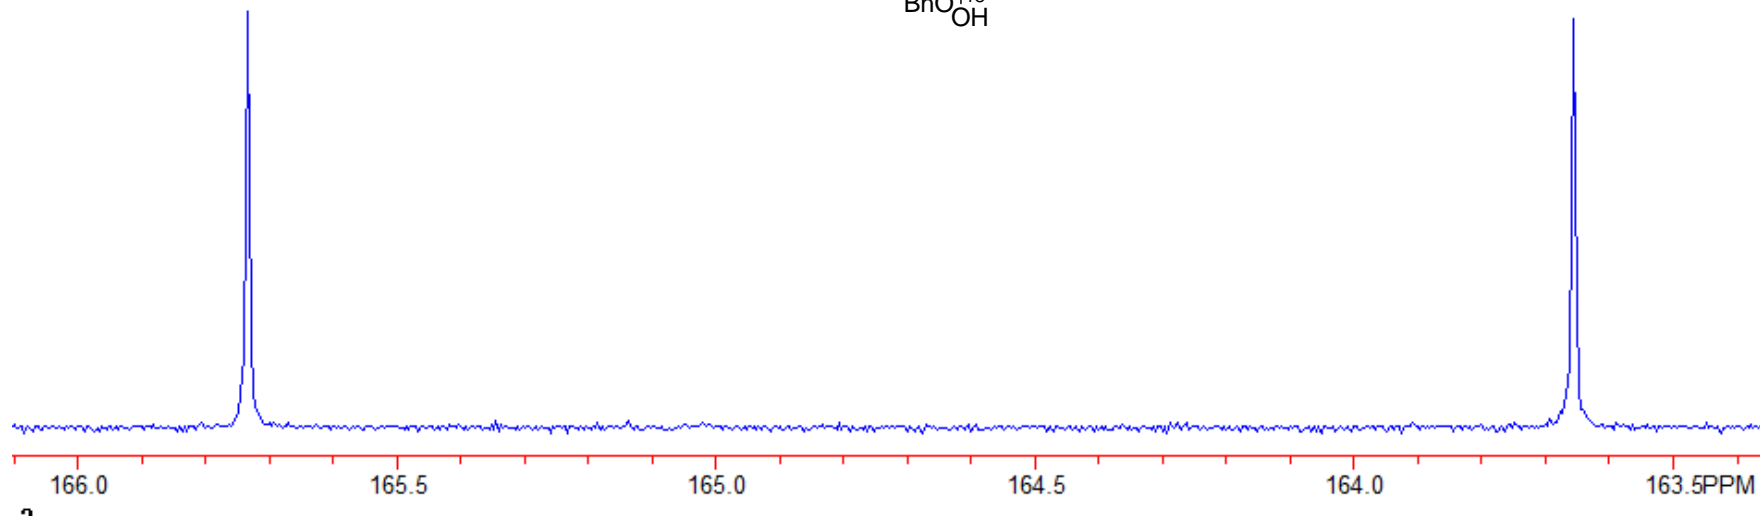

2,3,6-Tri-*O*-benzyl-4-*O*-(4-methoxybenzoyl)-D-[1-<sup>16/18</sup>O]-galactopyranosyl acetate (47).

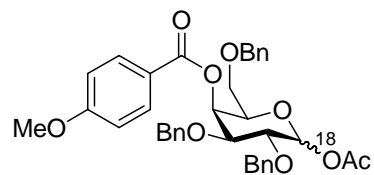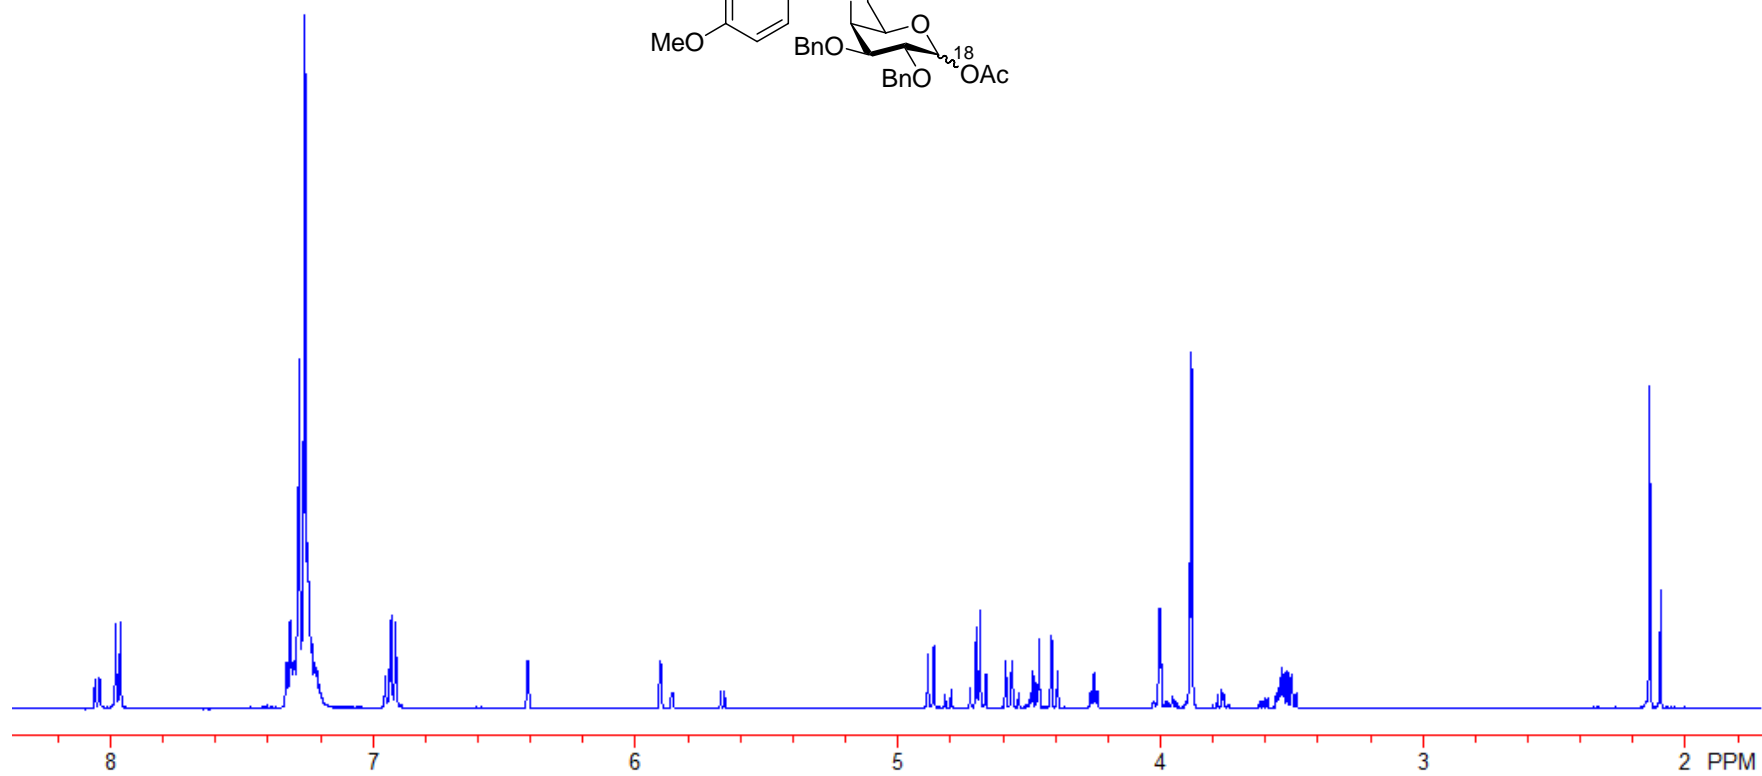

2,3,6-Tri-*O*-benzyl-4-*O*-(4-methoxybenzoyl)-D-[1-<sup>16/18</sup>O]-galactopyranosyl acetate (47).

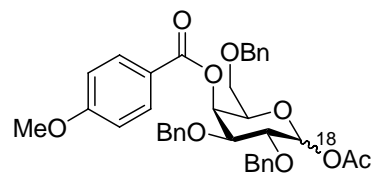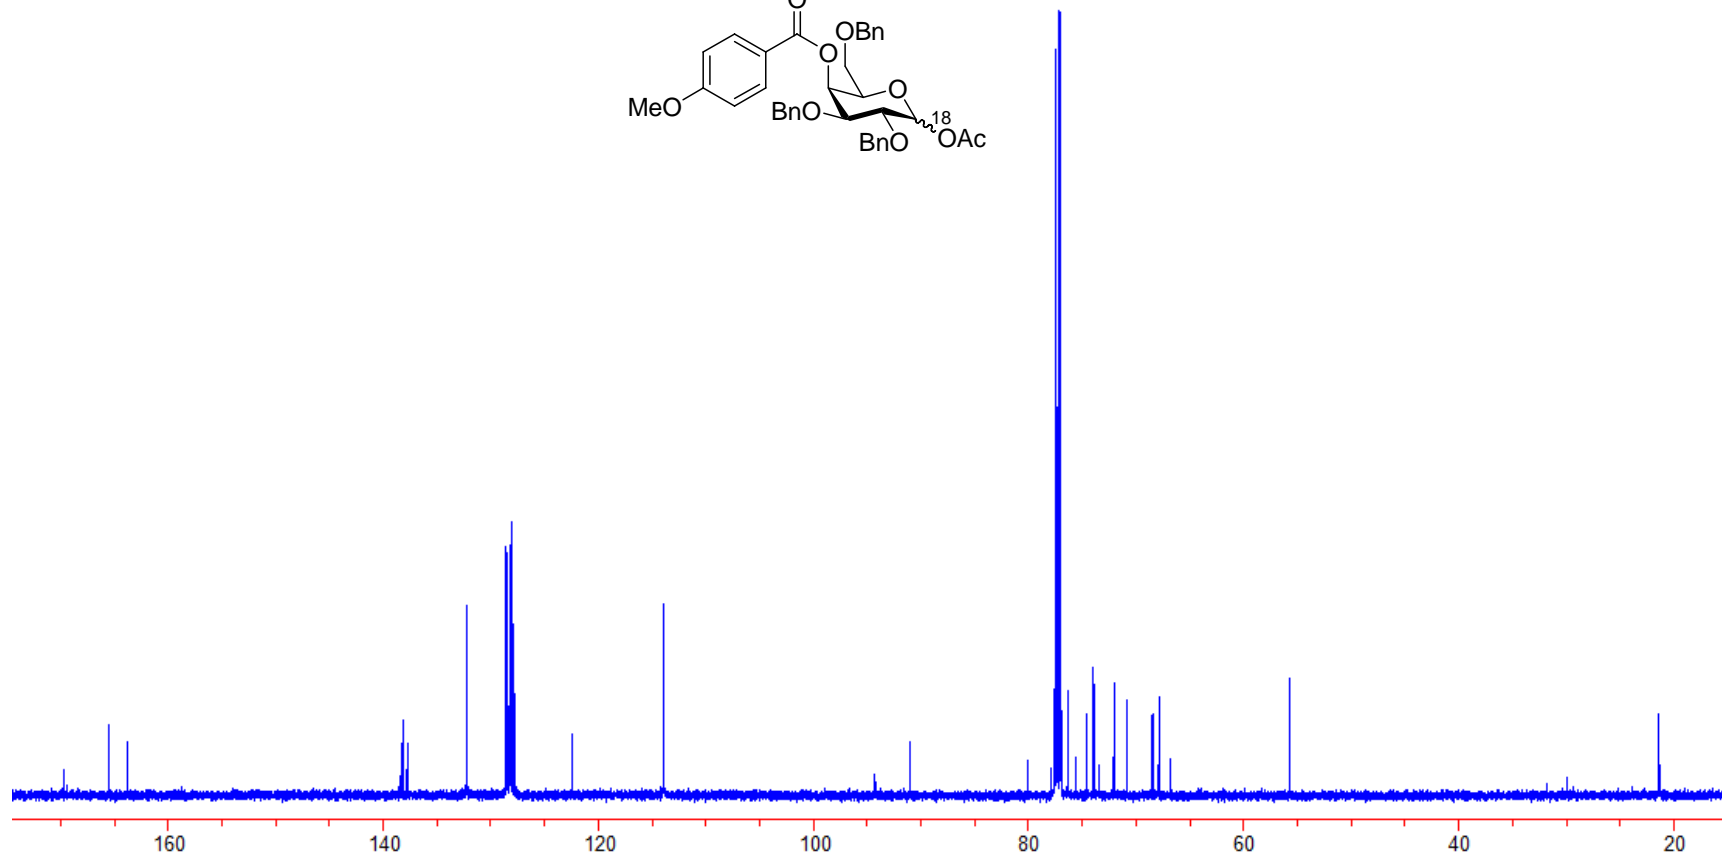

2,3,6-Tri-*O*-benzyl-4-*O*-(4-methoxybenzoyl)-D-[1-<sup>16/18</sup>O]-galactopyranosyl acetate (**47**, expansion).

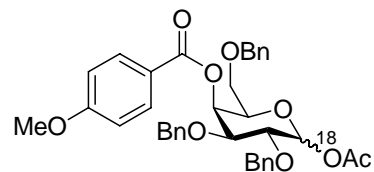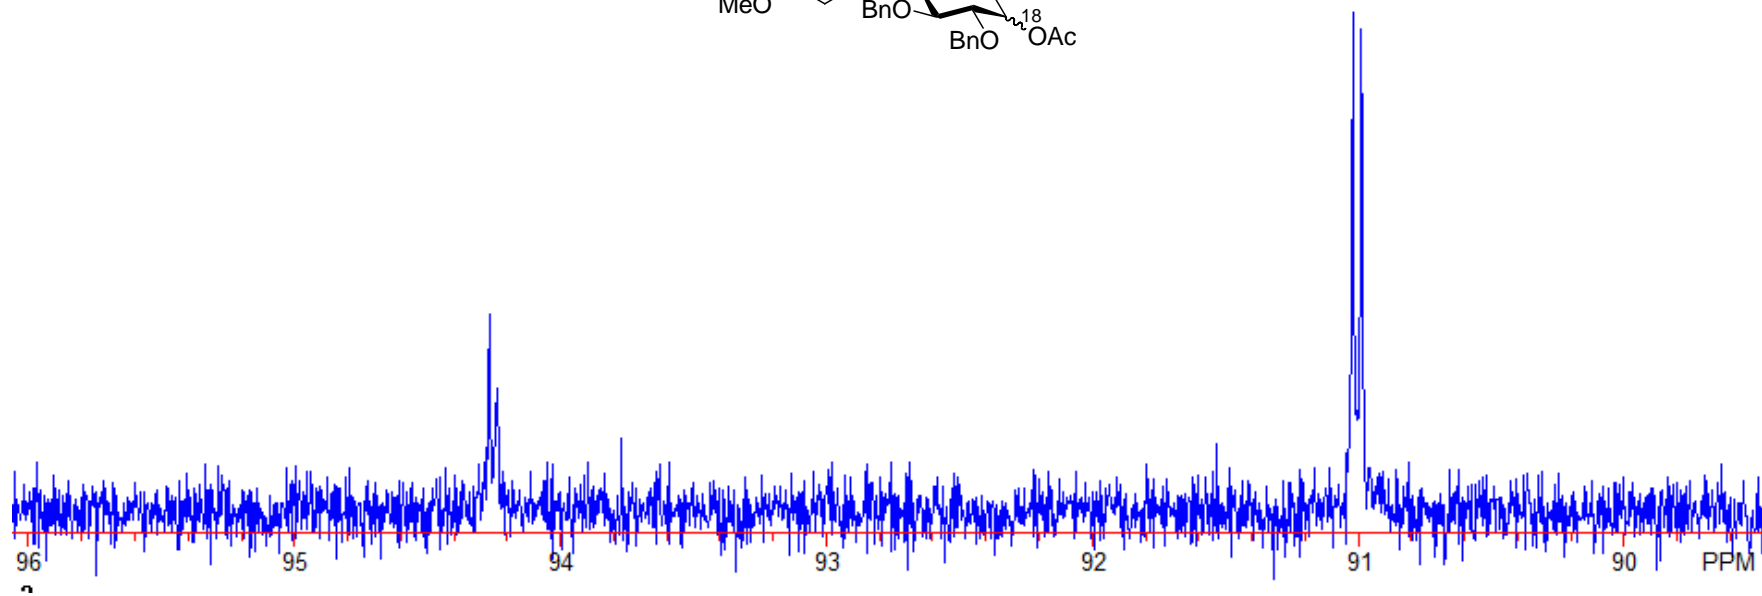

2,3,6-Tri-*O*-benzyl-4-*O*-(4-methoxybenzoyl)-D-[1-<sup>16/18</sup>O]-galactopyranosyl acetate (**47**, expansion).

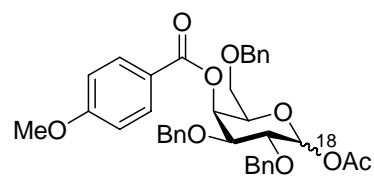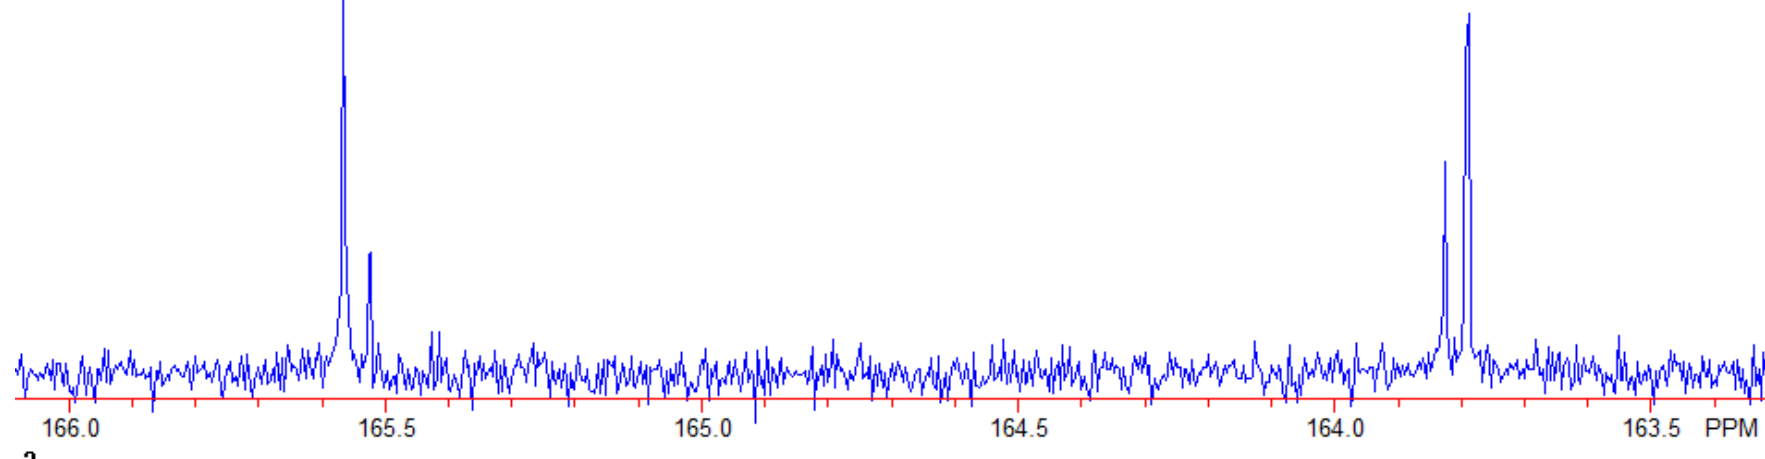

2,3,6-Tri-*O*-benzyl-4-*O*-(4-methoxybenzoyl)-D-[1-<sup>16/18</sup>O]-galactopyranosyl acetate (**47**, expansion).

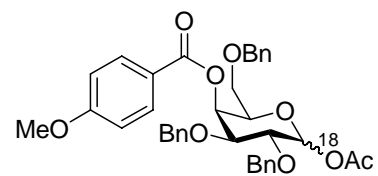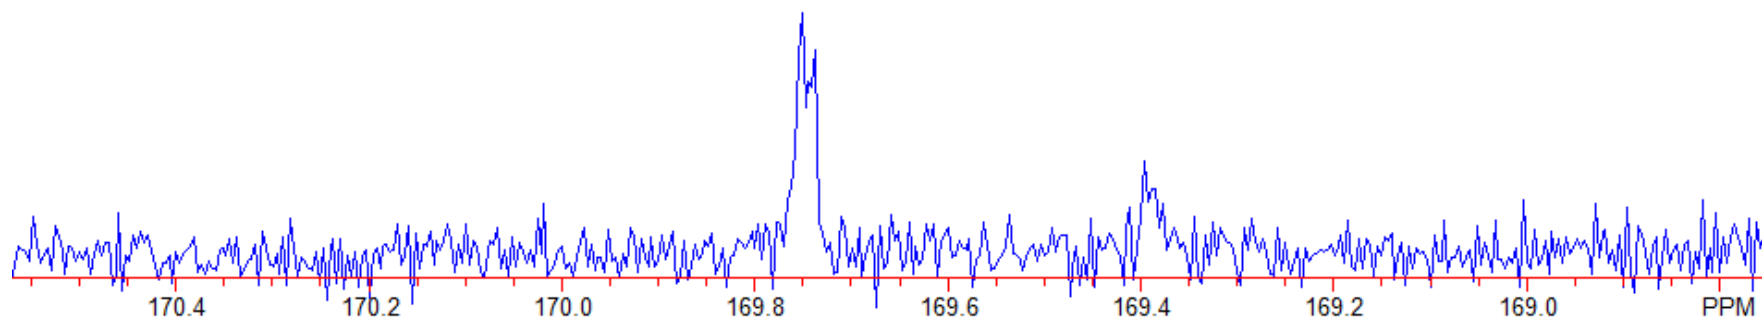



Phenyl 2,3,6-tri-*O*-benzyl-4-*O*-(4-methoxybenzoyl)-D-galactopyranoside (**41 $\alpha$**  and **41 $\beta$** ).

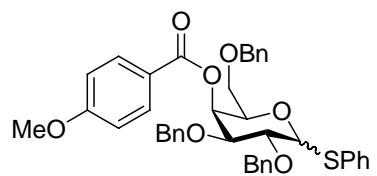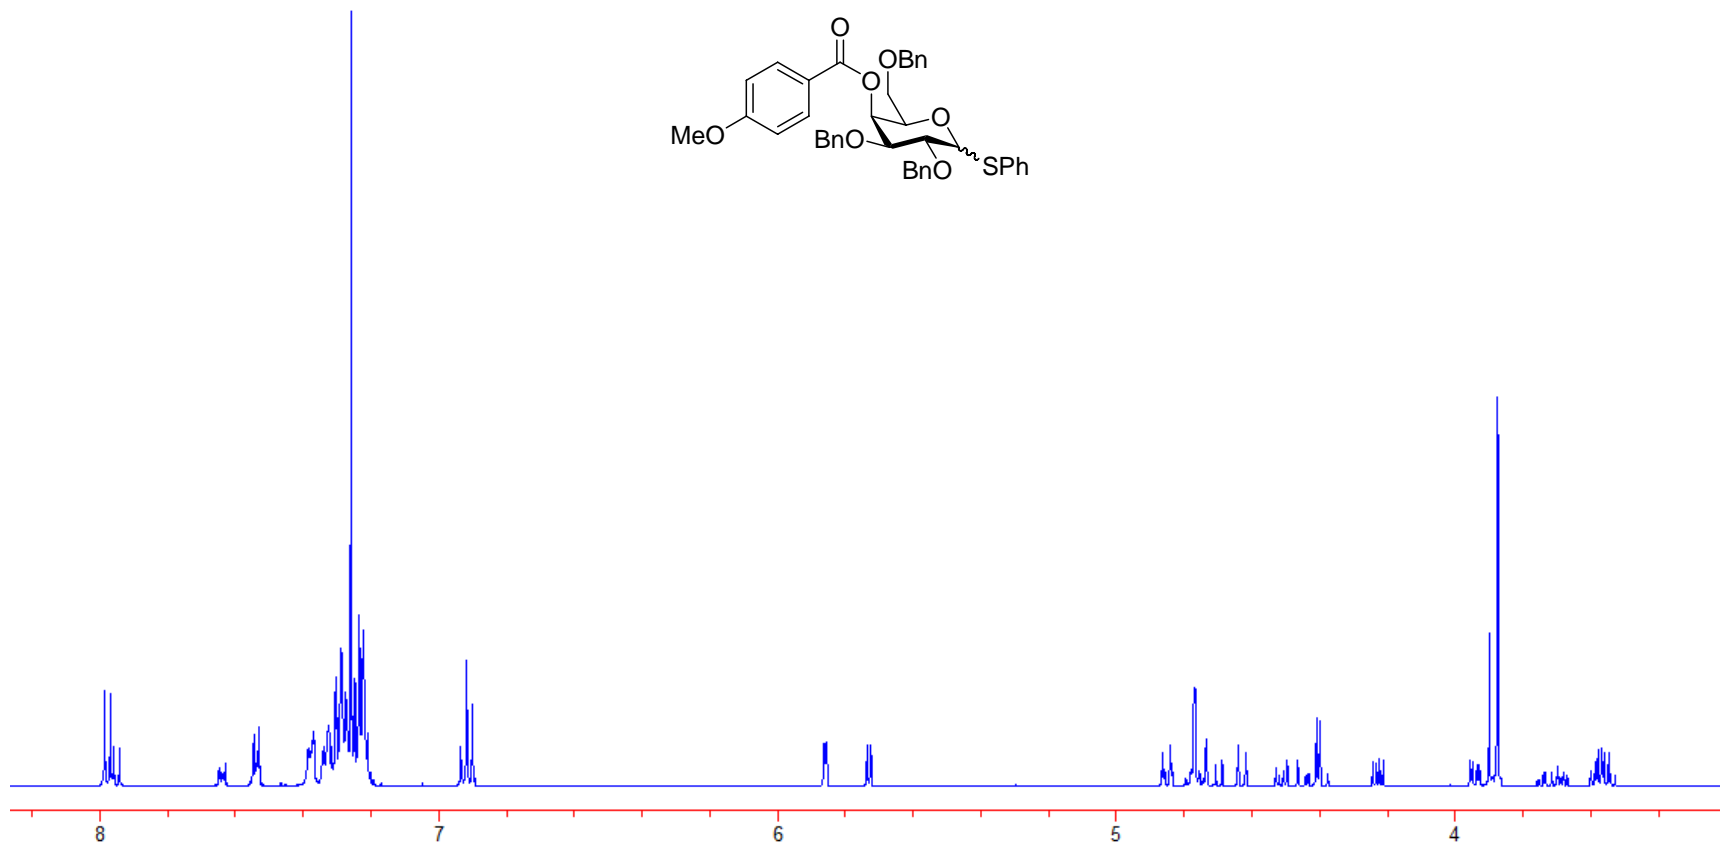

Phenyl 2,3,6-tri-*O*-benzyl-4-*O*-(4-methoxybenzoyl)-D-galactopyranoside (**41 $\alpha$**  and **41 $\beta$** ).

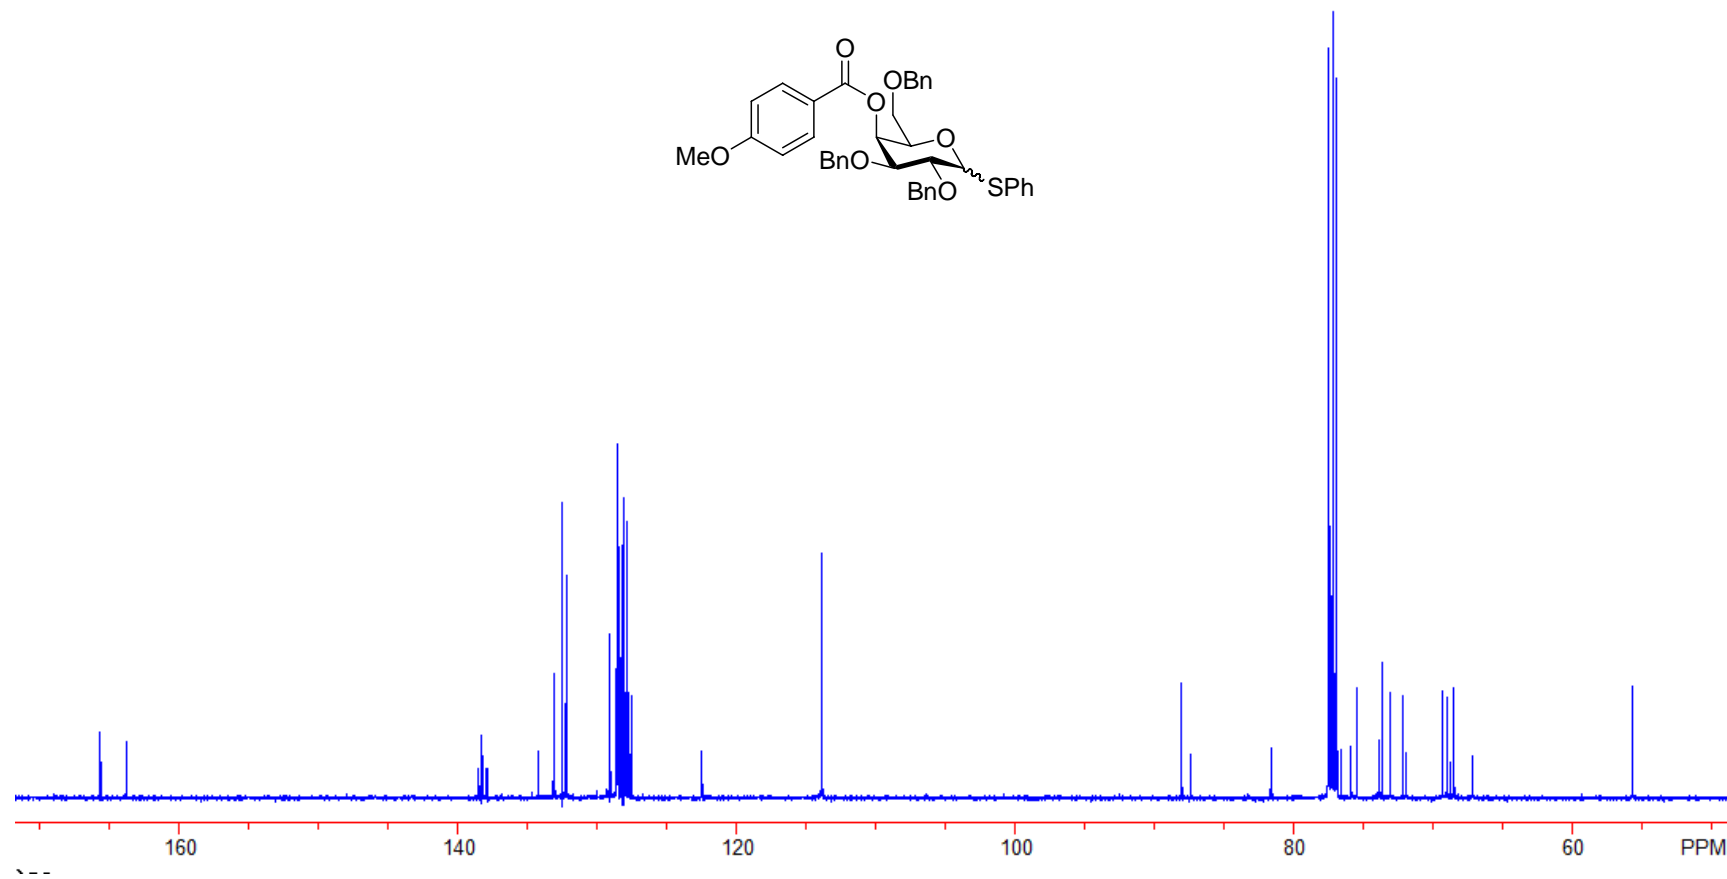

Supplement: NIHMS86436-supplement-1_si_001.pdf [file NIHMS86436-supplement-1_si_001.pdf]
